# Supplementary material for: Sesquiterpene Lactones Containing an α-Methylene-γ-Lactone Moiety Selectively Down-Regulate the Expression of Tumor Necrosis Factor Receptor 1 by Promoting Its Ectodomain Shedding in Human Lung Adenocarcinoma A549 Cells
Source: MDPI journal article supplement (doi:10.3390/molecules29081866), 2024-04-19

Figure S1: Original blots in Figure 1B

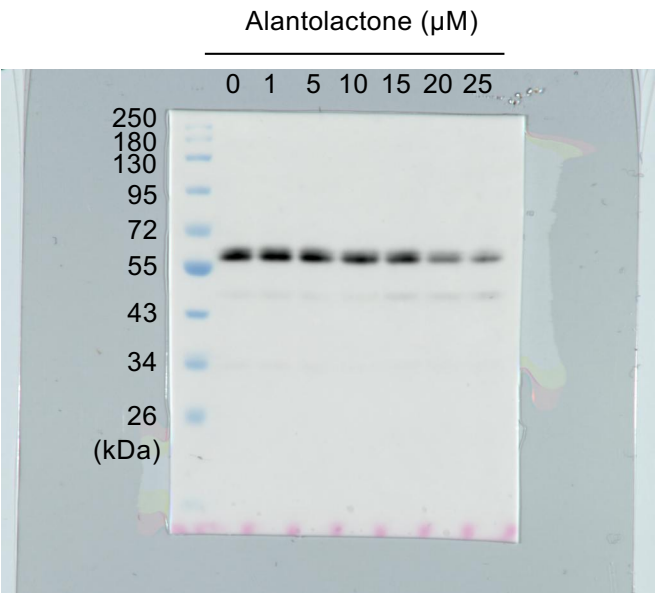

WB: TNF-R1

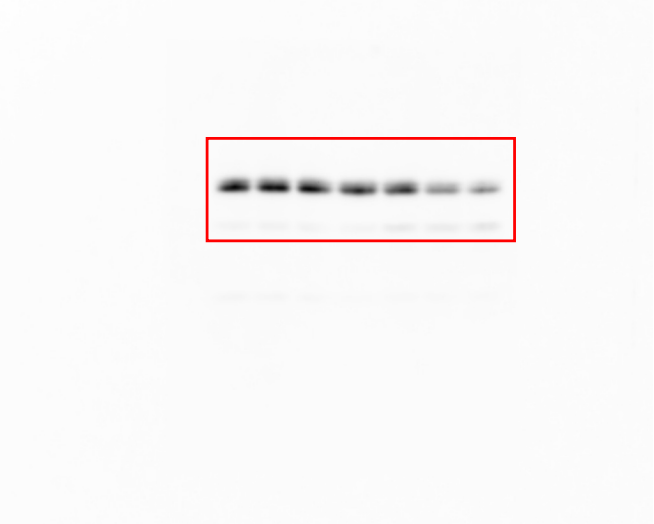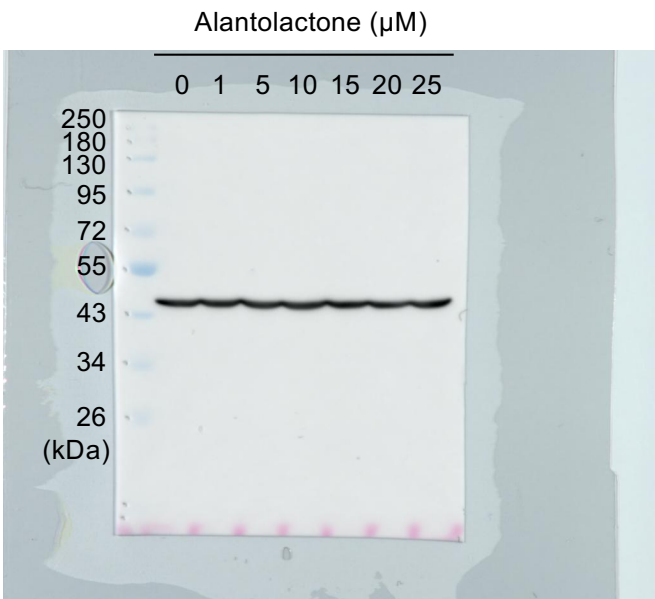

WB:  $\beta$ -Actin (reprobed)

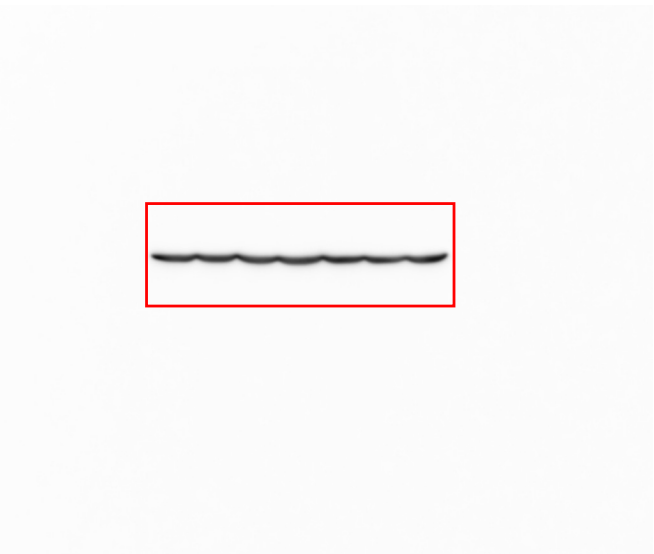

Figure S2: Original blots (1) in Figure 1C

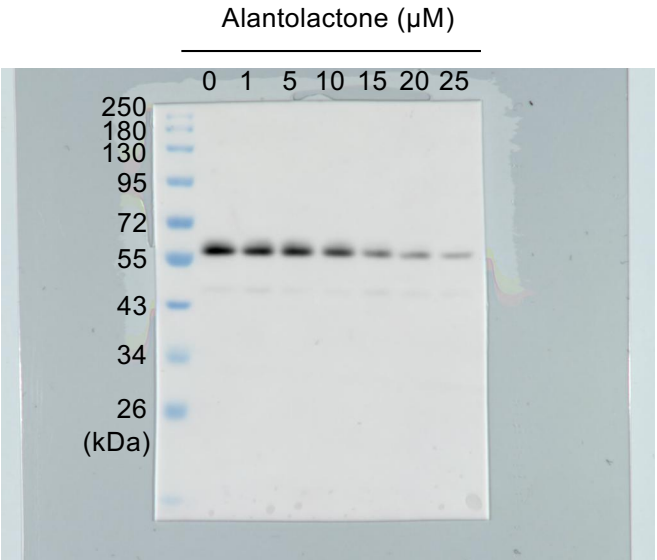

WB: TNF-R1

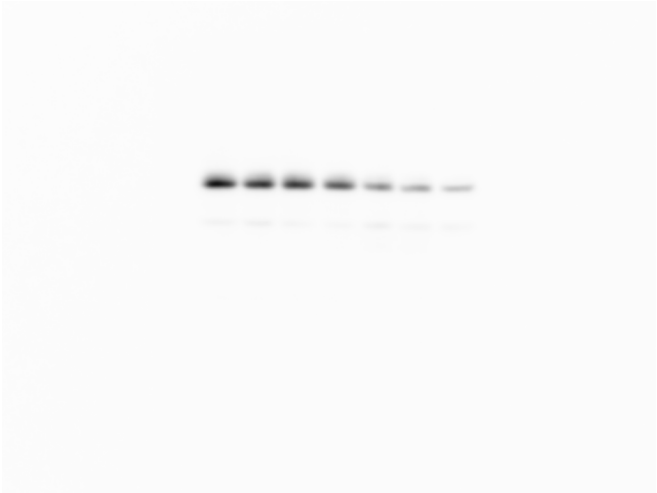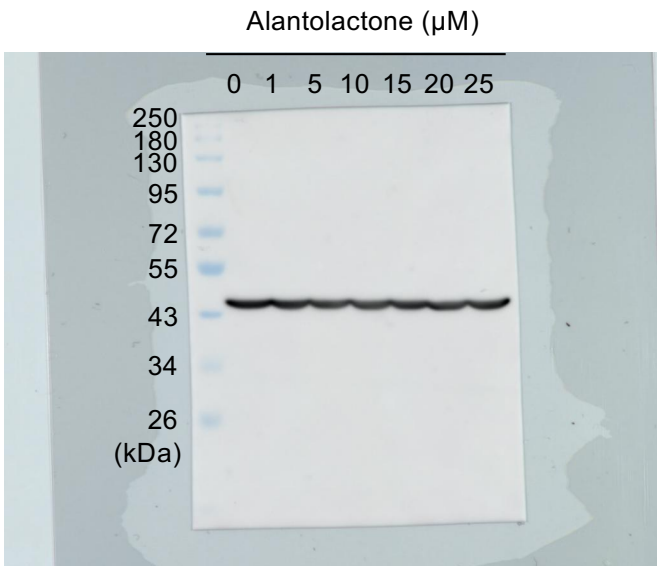

WB:  $\beta$ -Actin (reprobed)

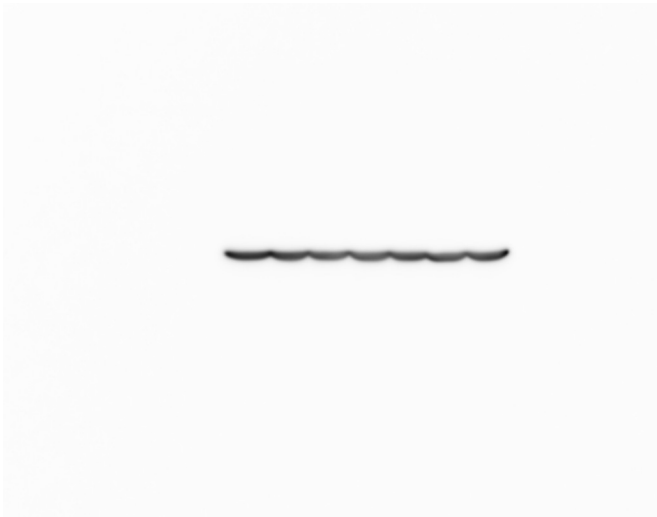

**Figure S3: Original blots (2) in Figure 1C**

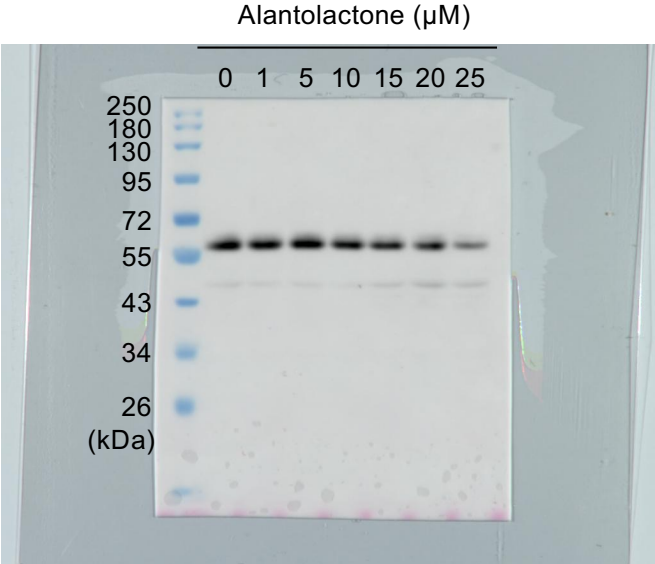

WB: TNF-R1

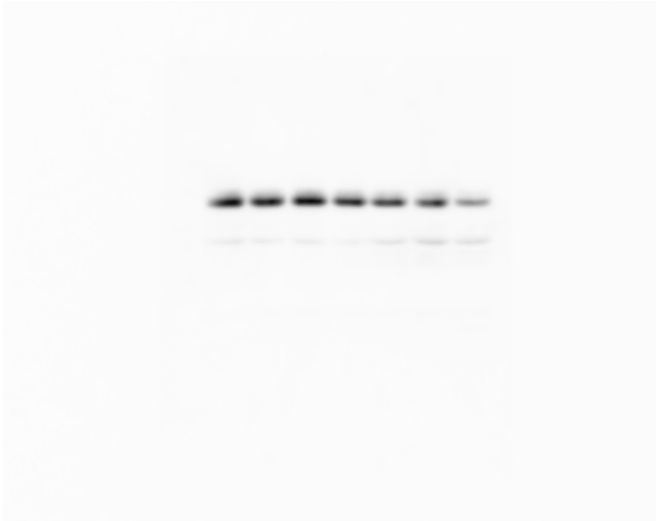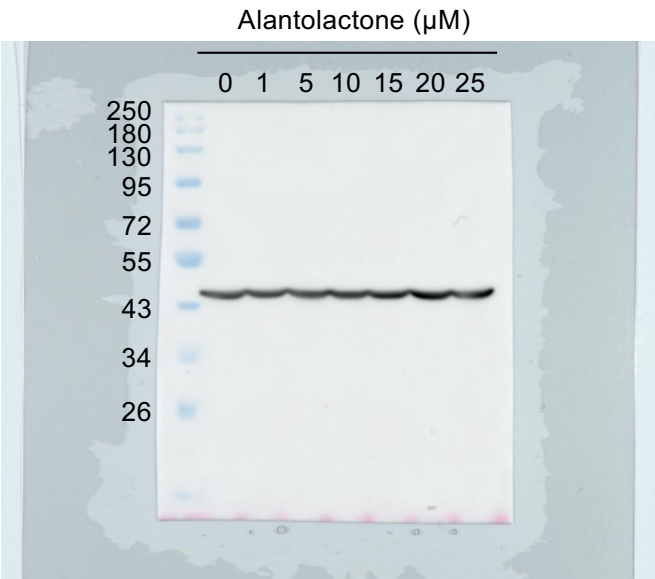

WB:  $\beta$ -Actin (reprobed)

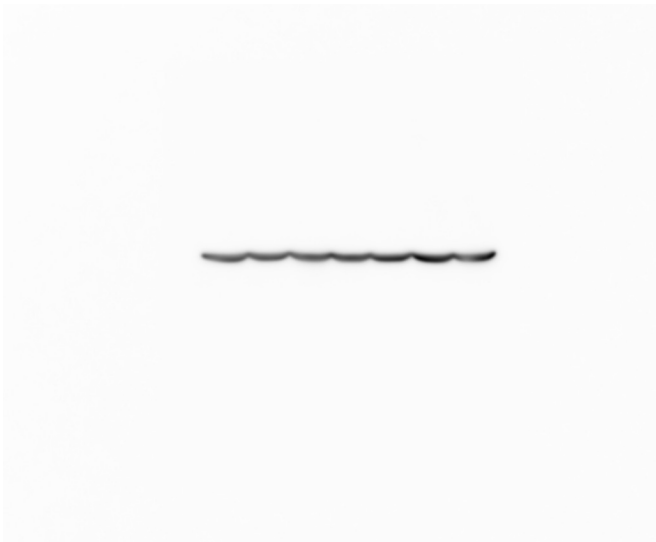

Figure S4: Original blots (3) in Figure 1C

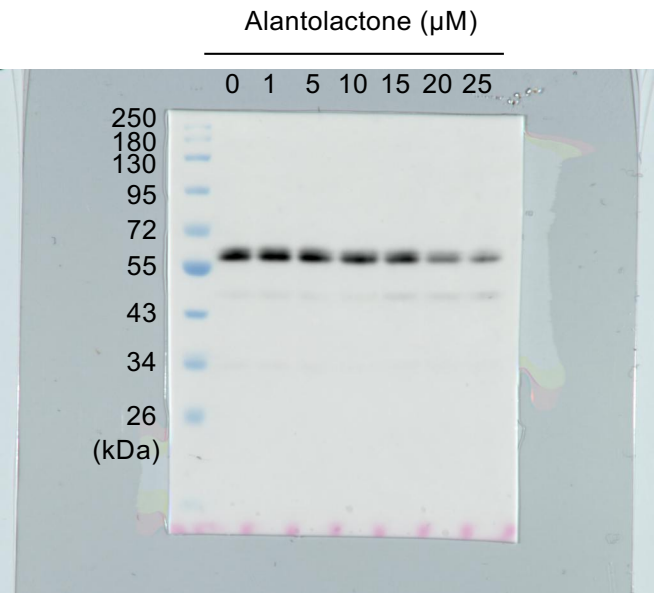

WB: TNF-R1

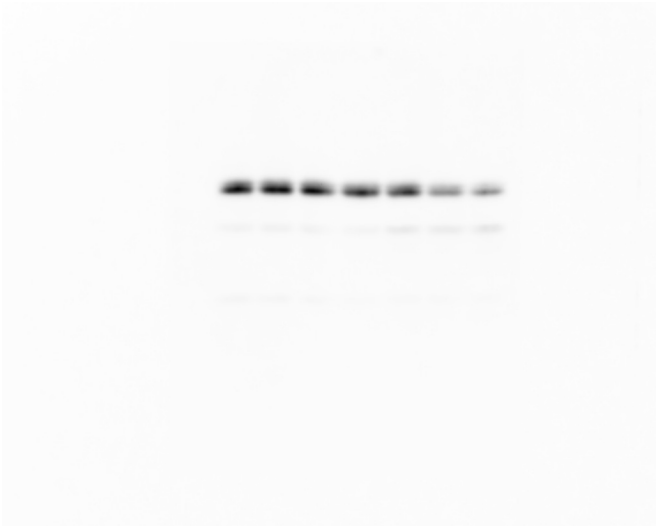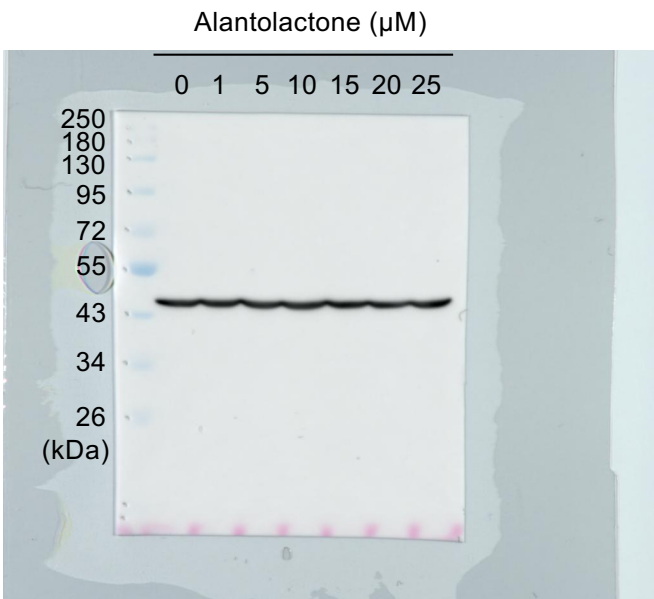

WB:  $\beta$ -Actin (reprobed)

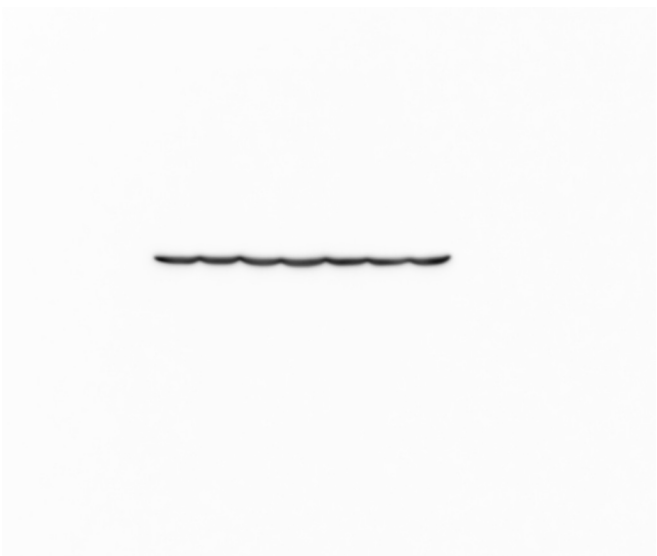



Figure S5: Original blots in Figure 2A

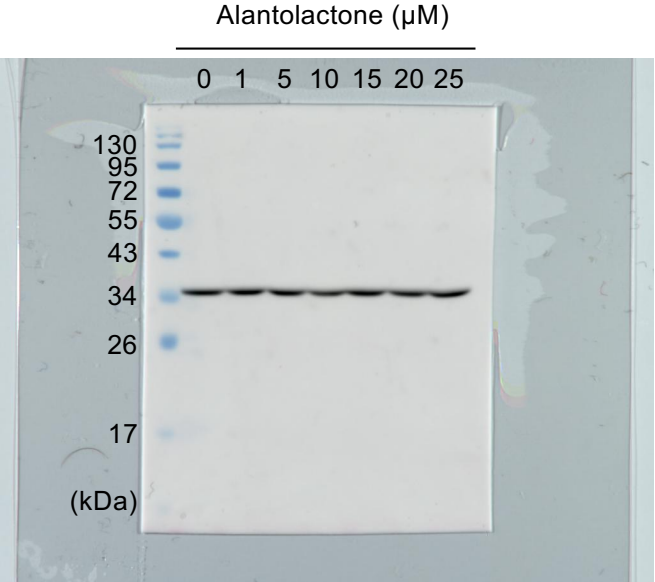

WB: TRADD

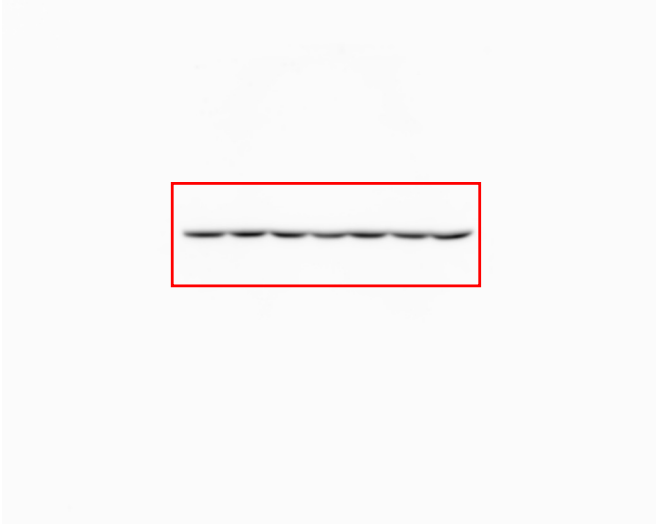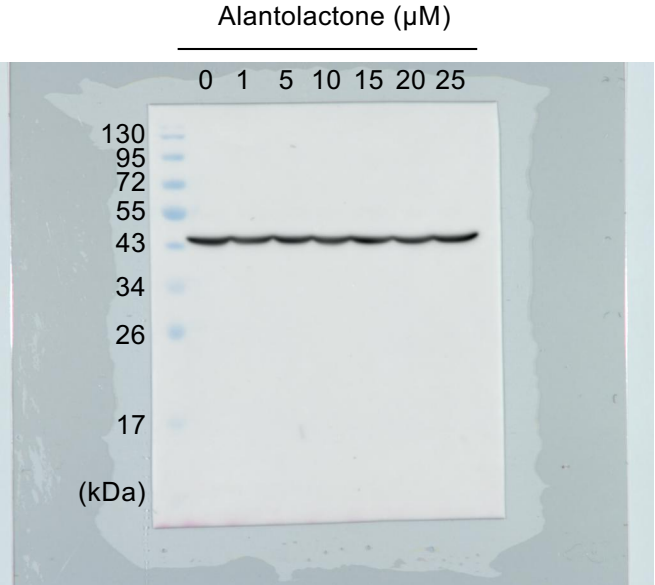

WB:  $\beta$ -Actin (reprobed)

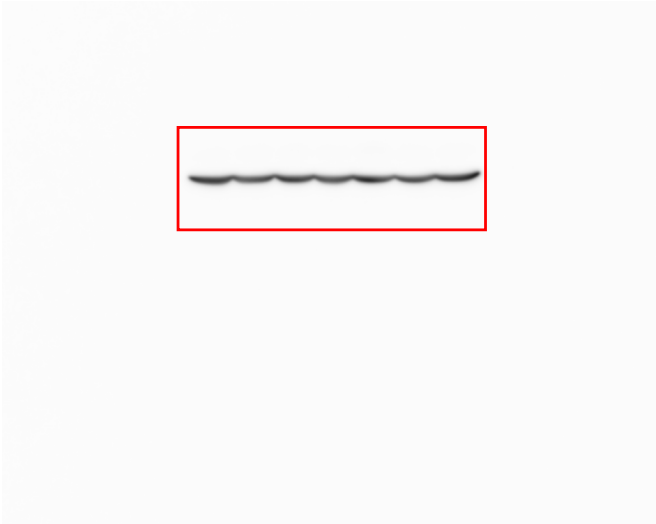

Figure S6: Original blots (1) in Figure 2B

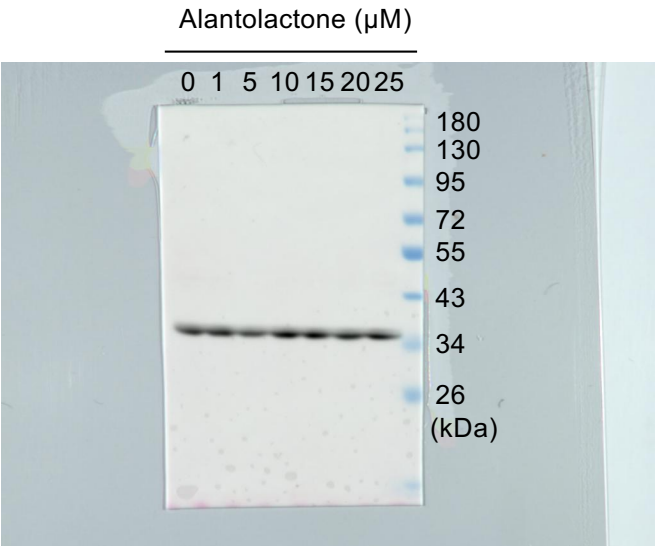

WB: TRADD

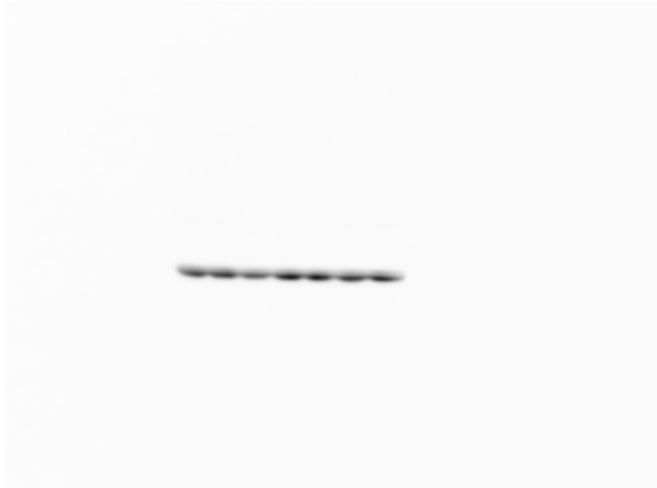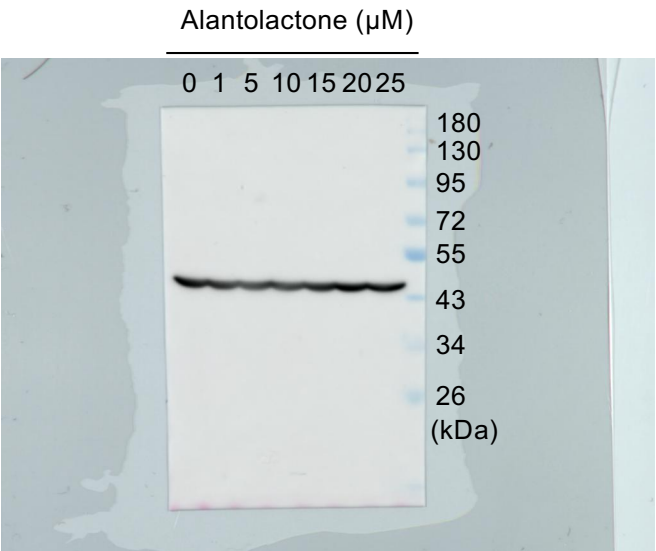

WB:  $\beta$ -Actin (reprobed)

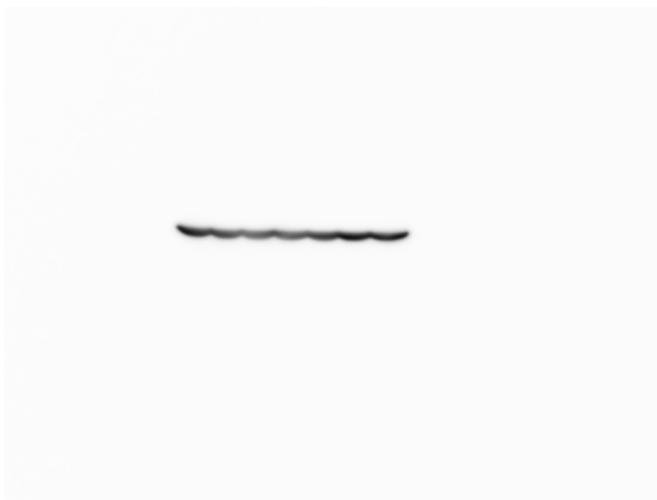

**Figure S7: Original blots (2) in Figure 2B**

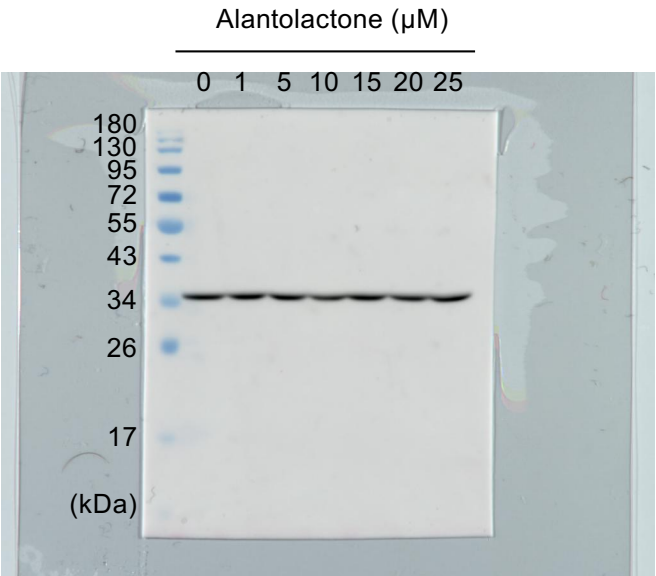

WB: TRADD

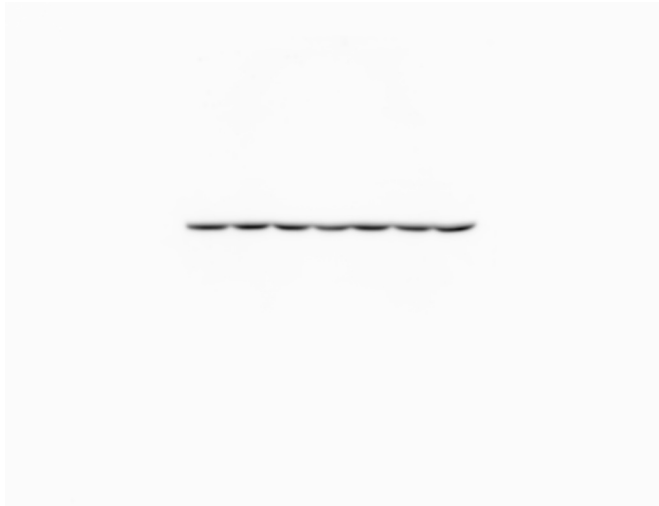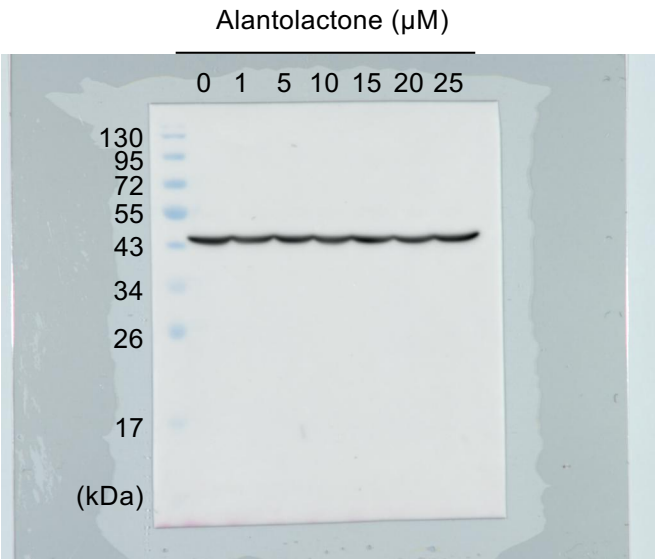

WB:  $\beta$ -Actin (reprobed)

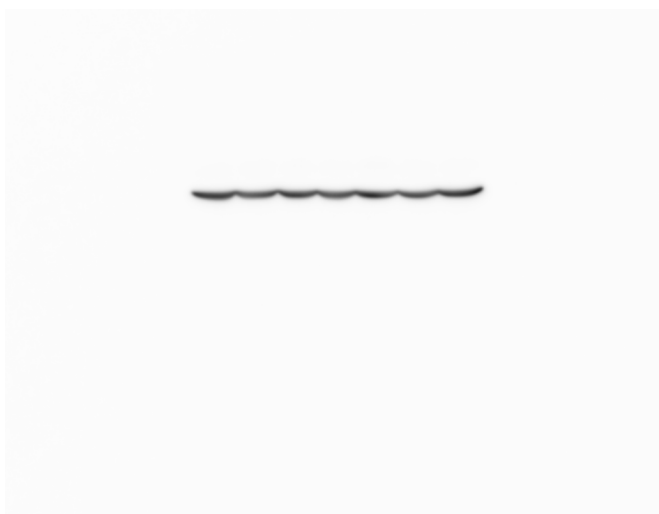

Figure S8: Original blots (3) in Figure 2B

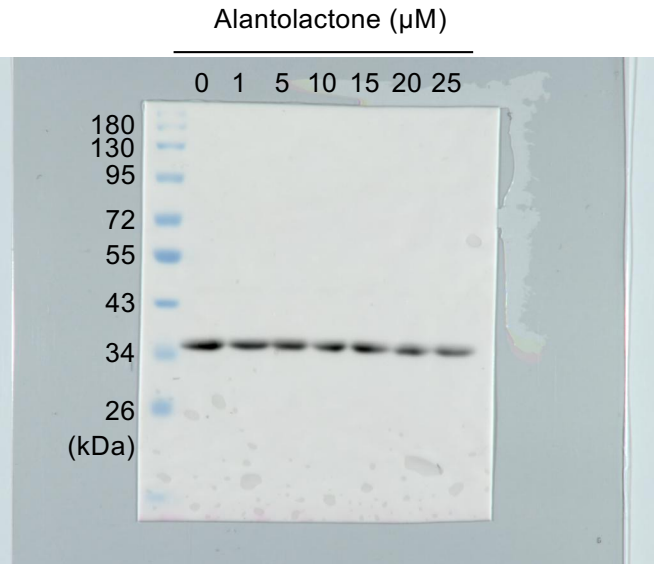

WB: TRADD

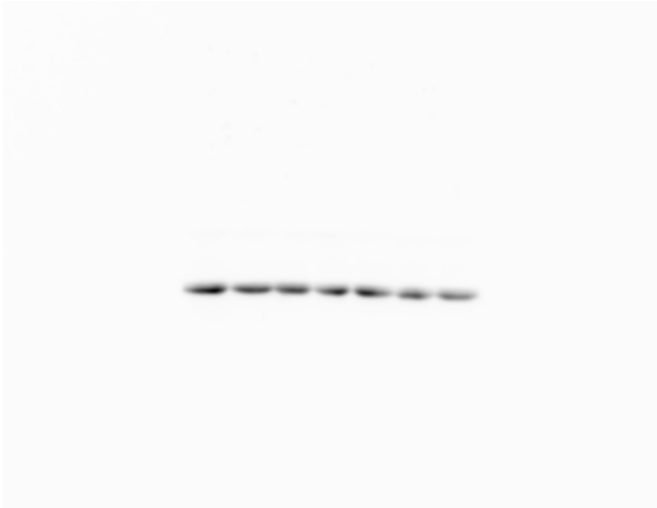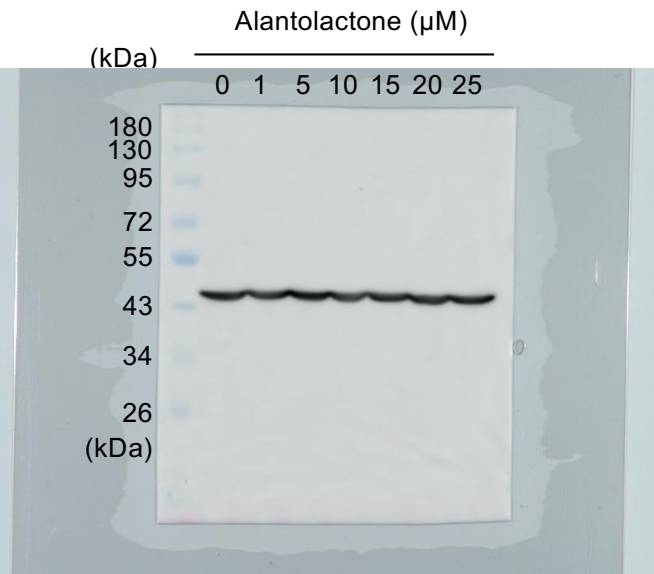

WB:  $\beta$ -Actin (reprobed)

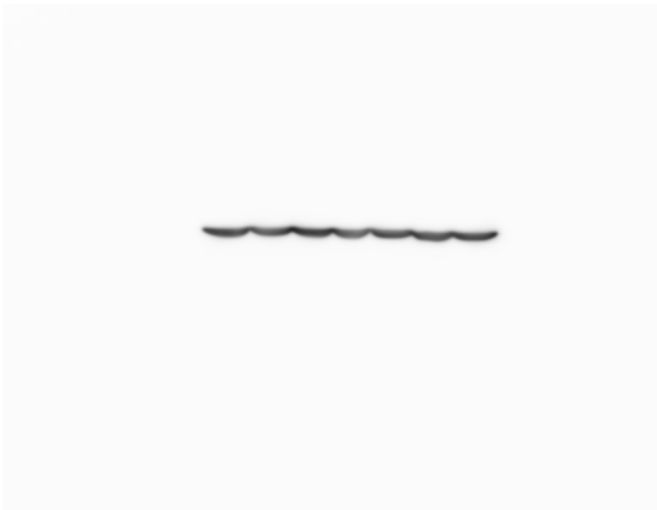

Figure S9: Original blots in Figure 2C

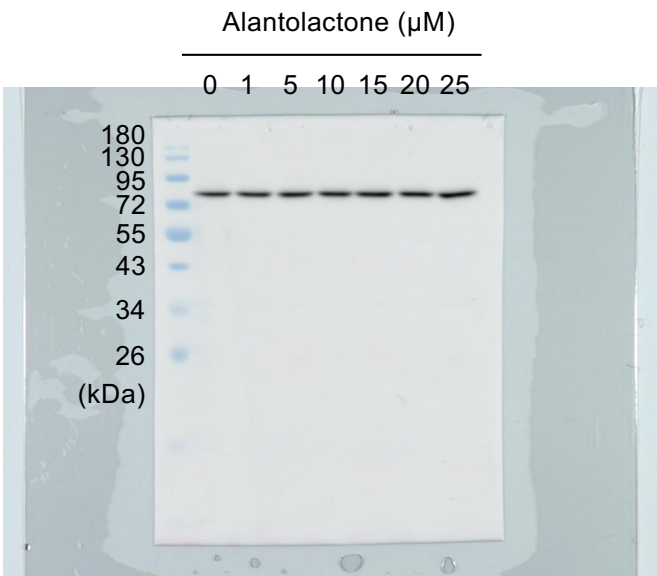

WB: RIPK1

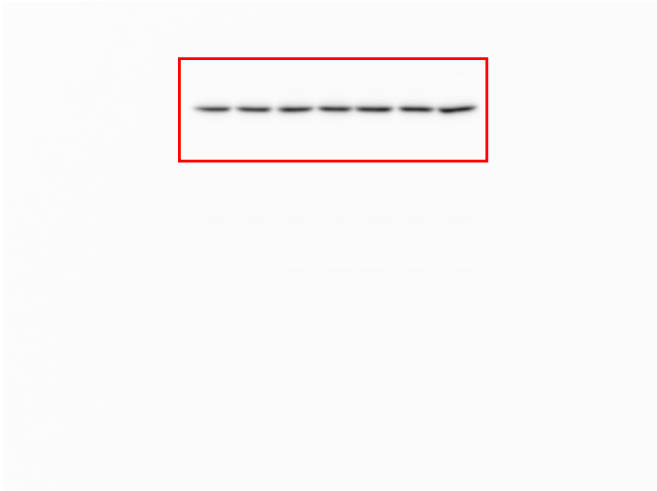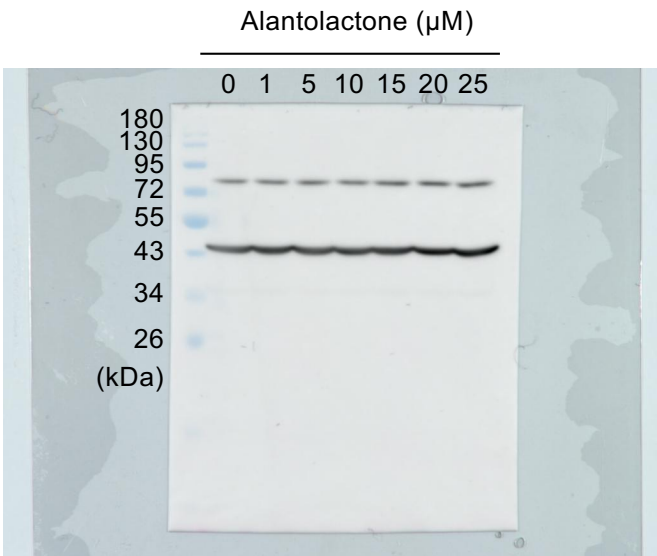

WB:  $\beta$ -Actin (reprobed)

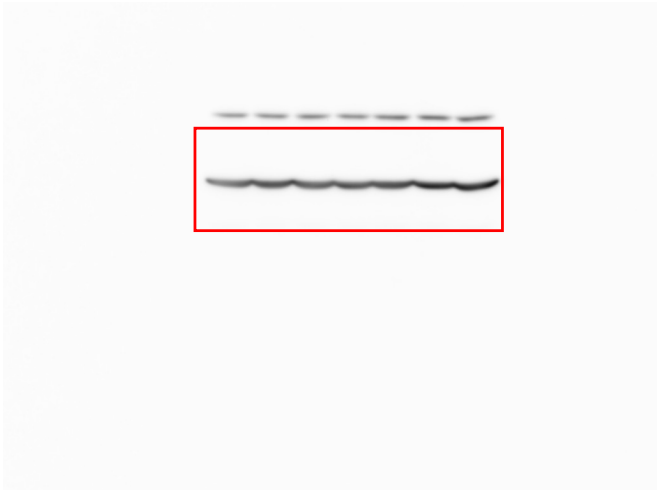

Figure S10: Original blots (1) in Figure 2D

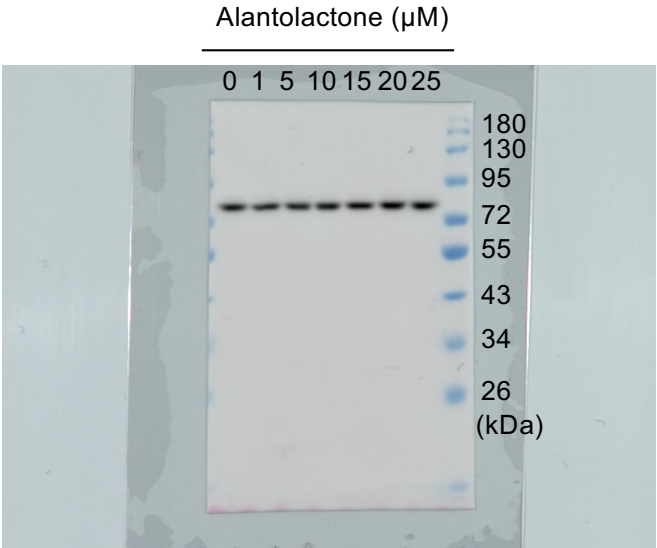

WB: RIPK1

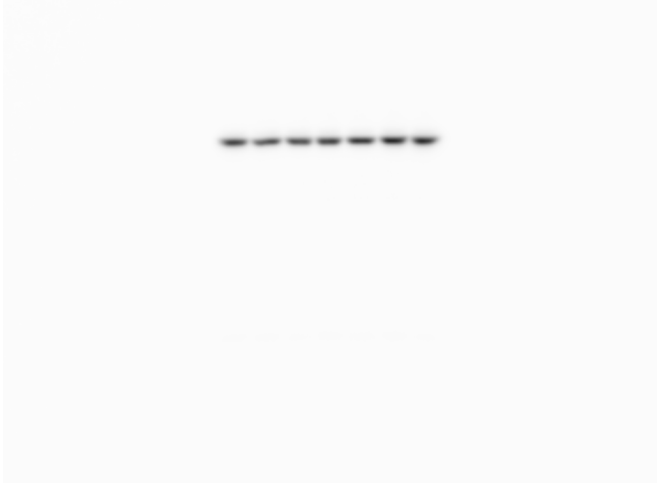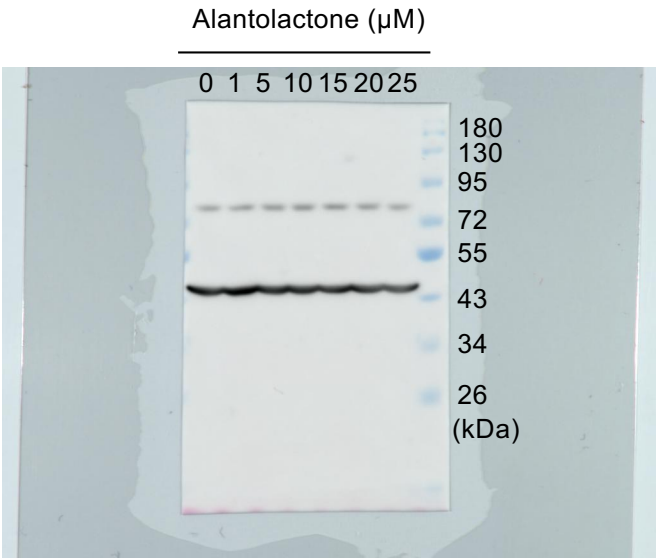

WB:  $\beta$ -Actin (reprobed)

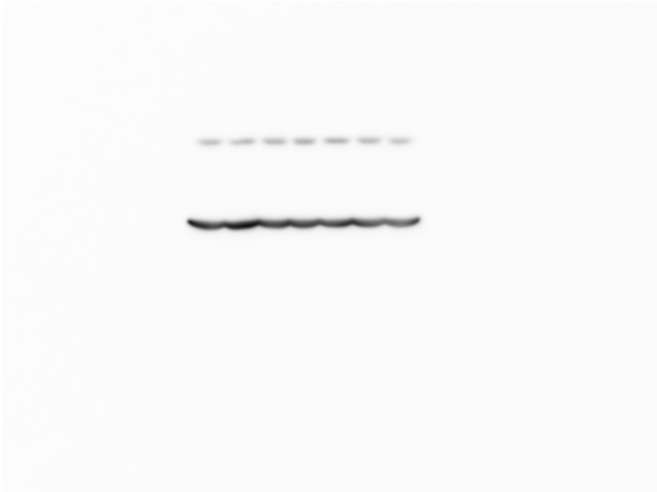

Figure S11: Original blots (2) in Figure 2D

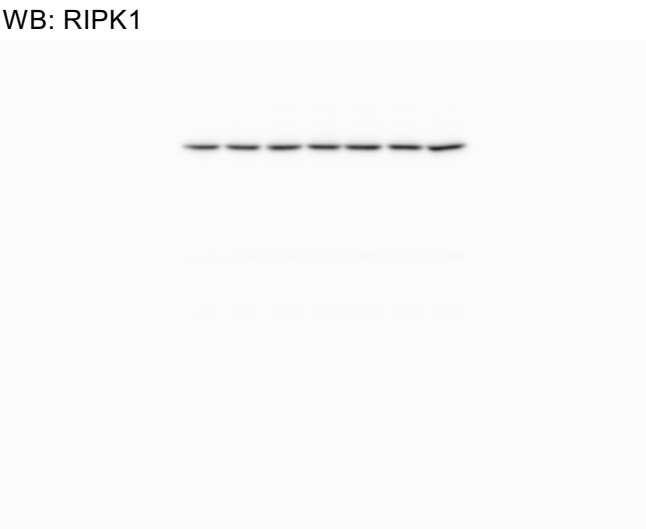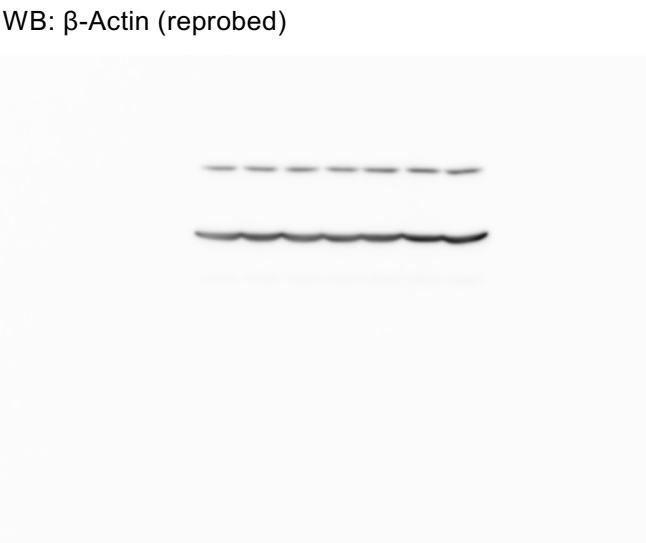

Figure S12: Original blots (3) in Figure 2D

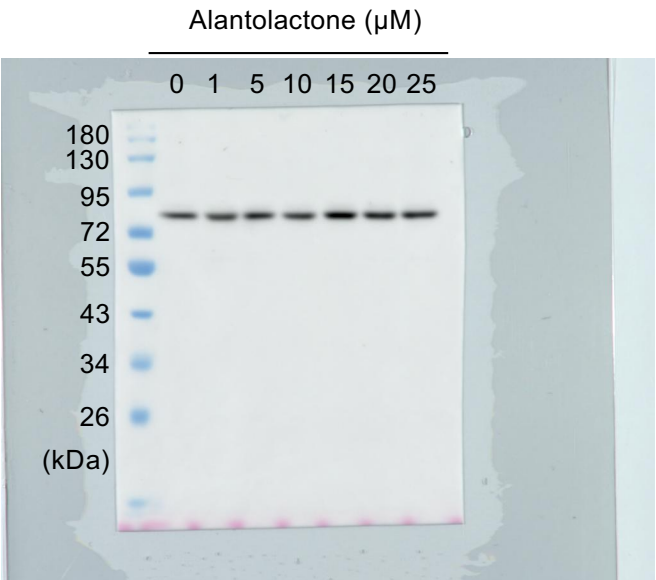

WB: RIPK1

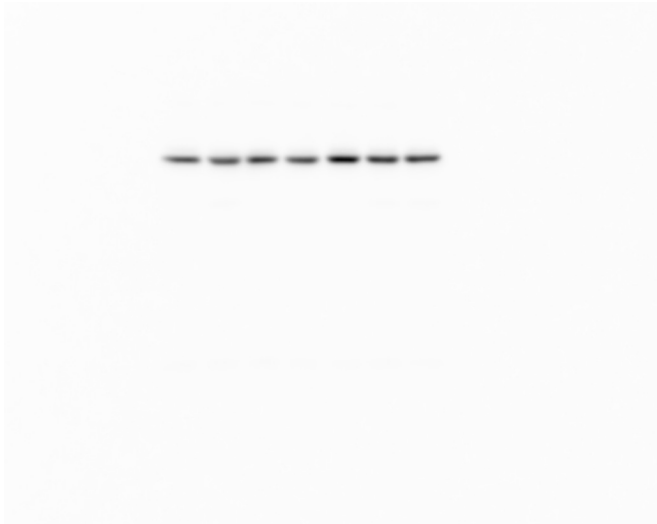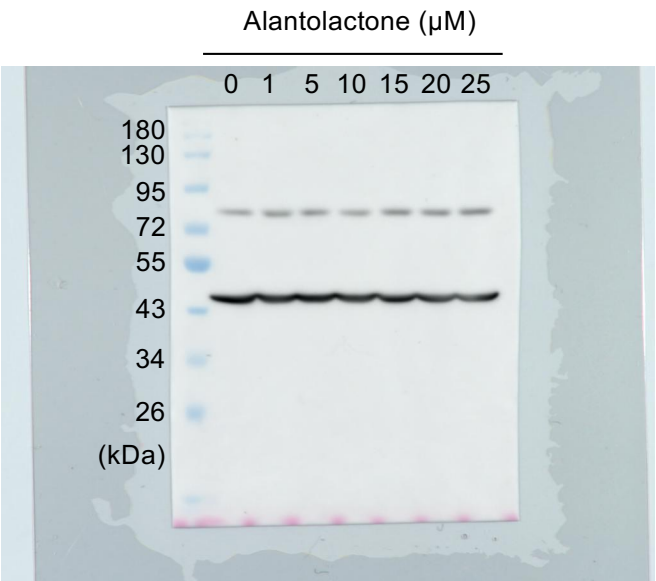

WB:  $\beta$ -Actin (reprobed)

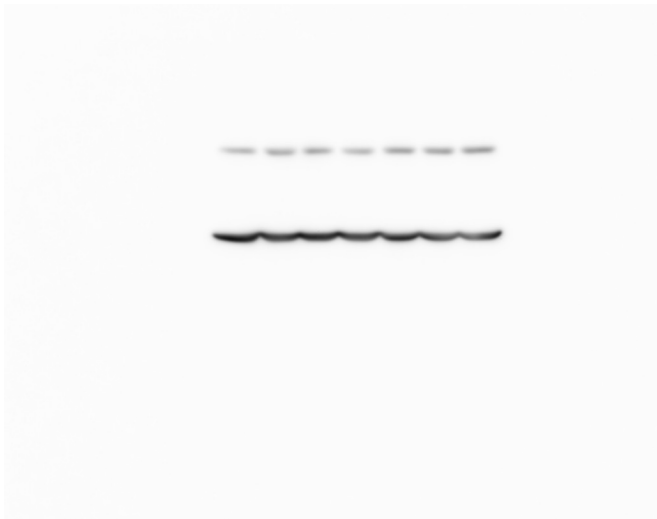



Figure S13: Original blots in Figure 2E

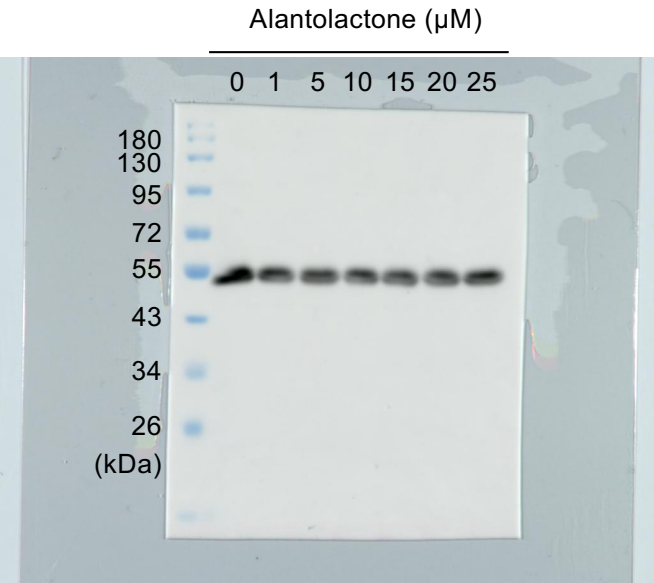

WB: TRAF2

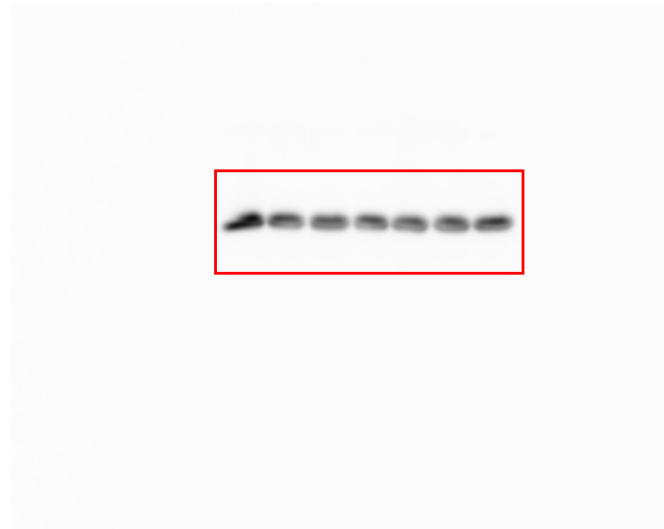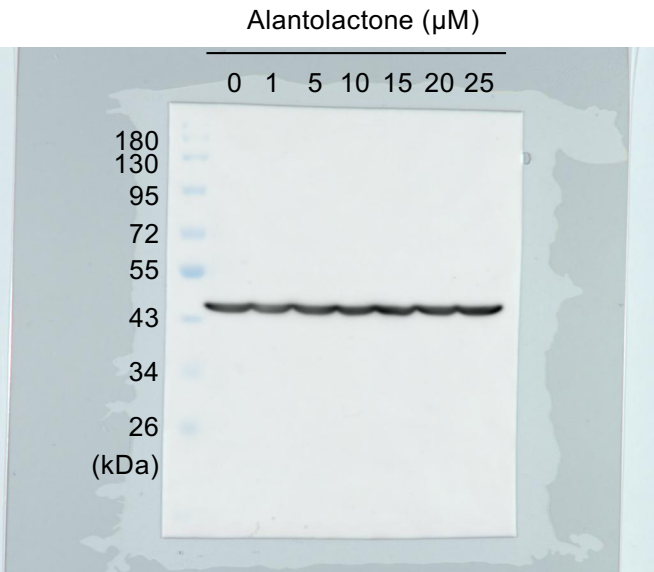

WB:  $\beta$ -Actin (reprobed)

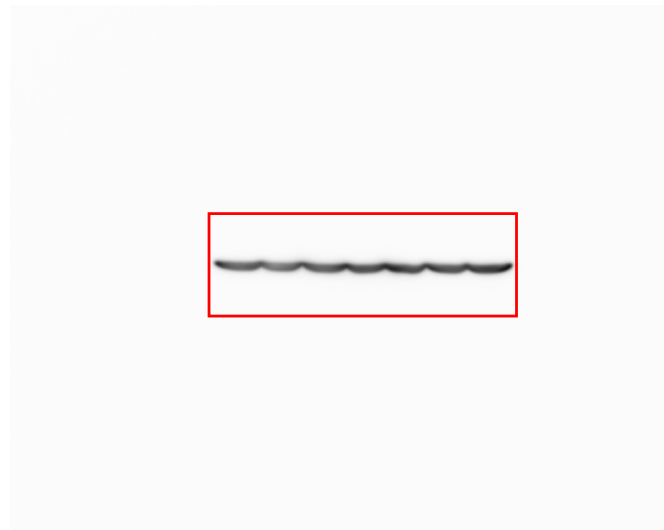

Figure S14: Original blots (1) in Figure 2F

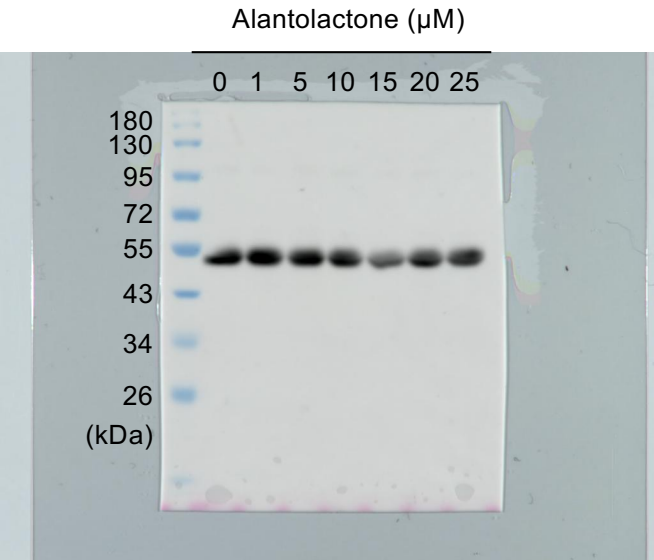

WB: TRAF2

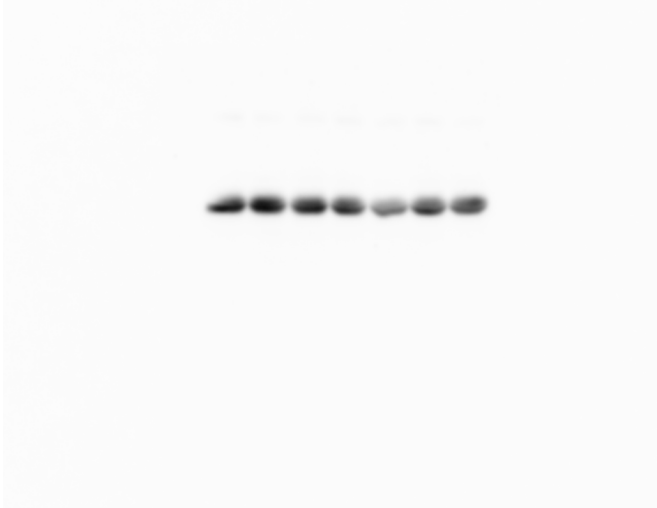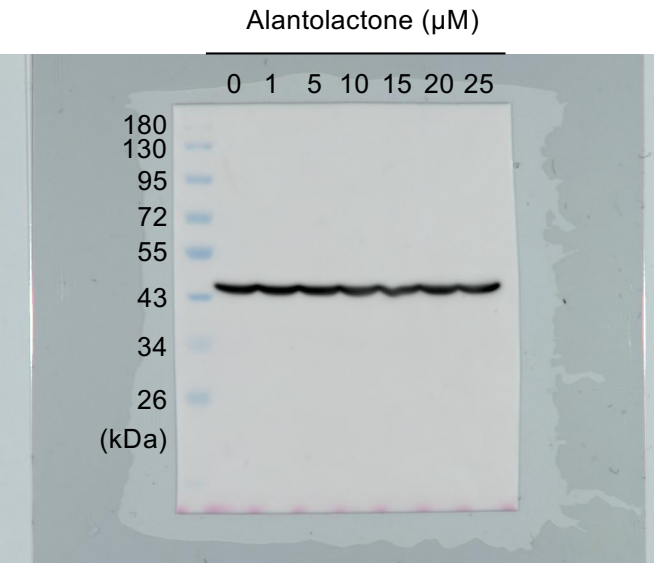

WB:  $\beta$ -Actin (reprobed)

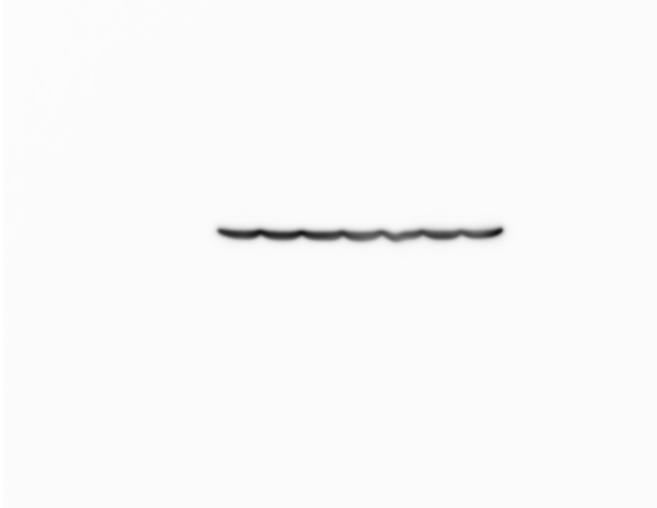

Figure S15: Original blots (2) in Figure 2F

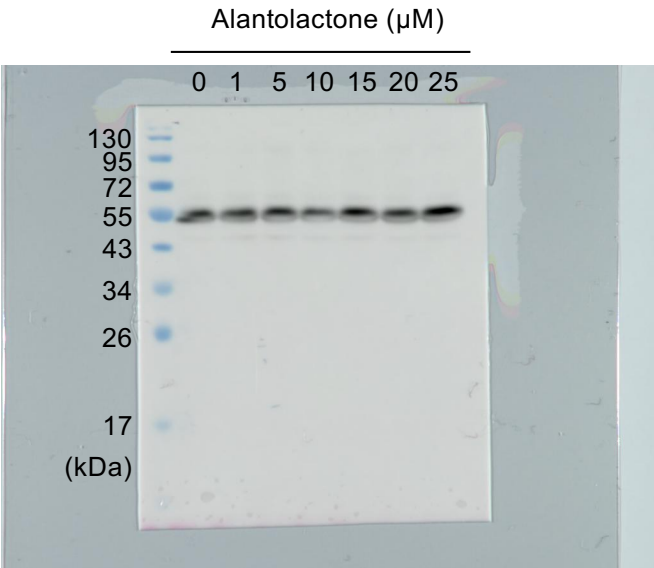

WB: TRAF2

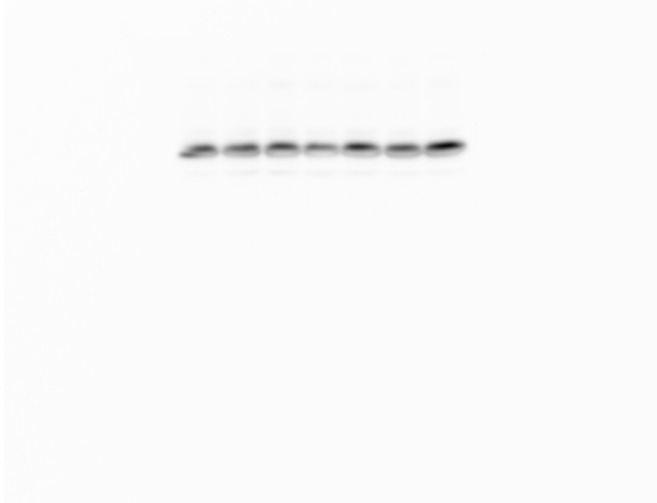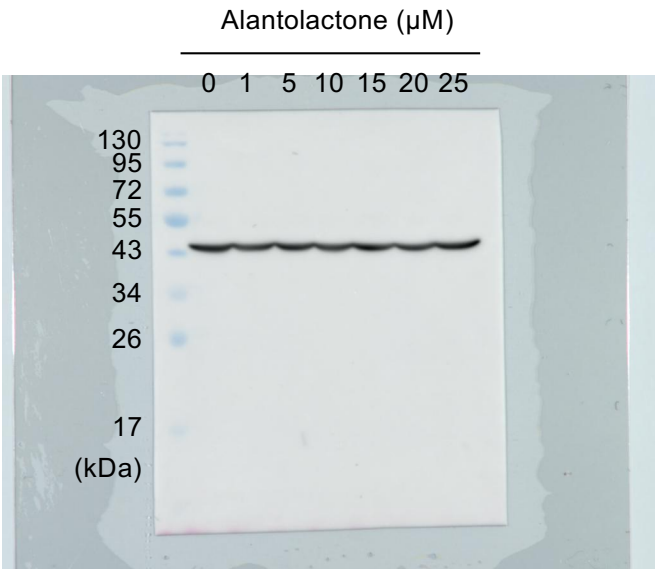

WB:  $\beta$ -Actin (reprobed)

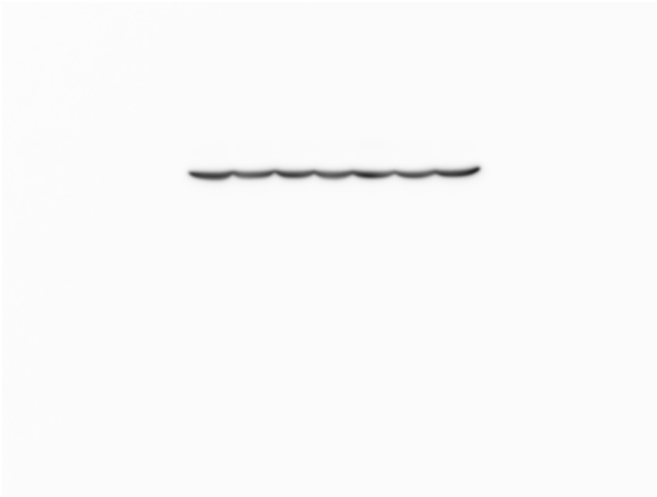

Figure S16: Original blots (3) in Figure 2F



WB: TRAF2

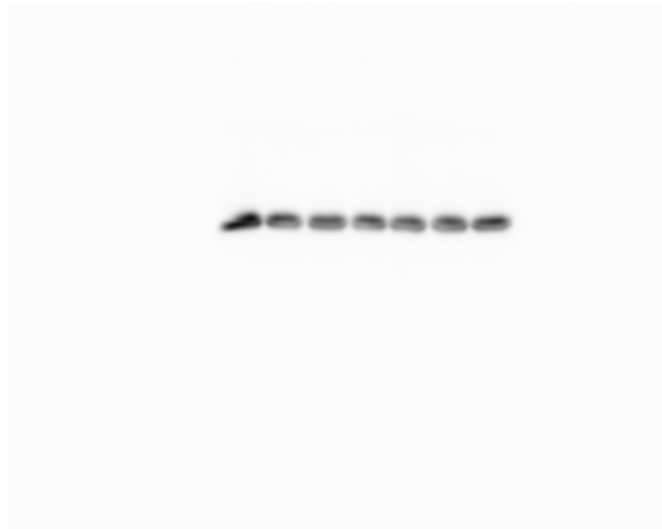

WB:  $\beta$ -Actin (reprobed)

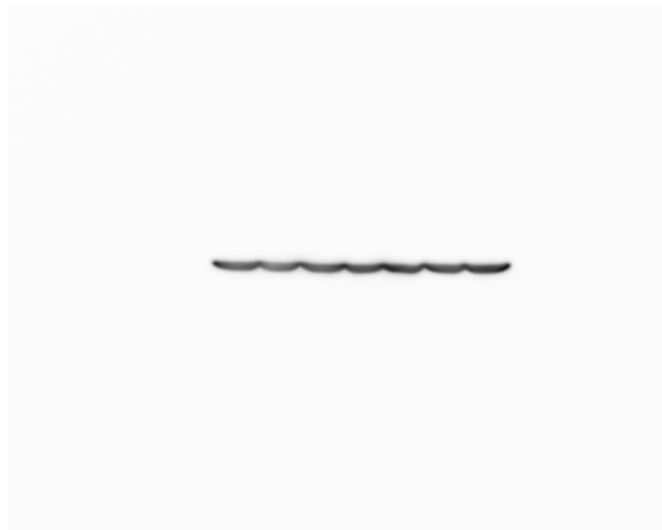

Figure S17: Original blots in Figure 3A

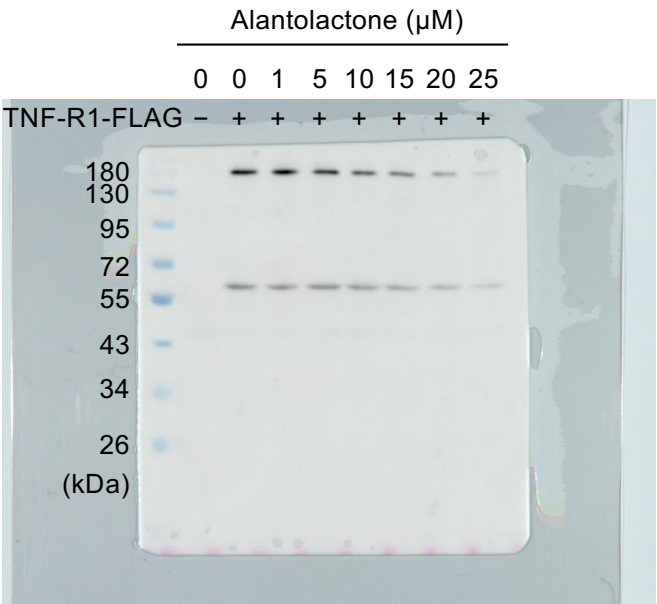

WB: TNF-R1

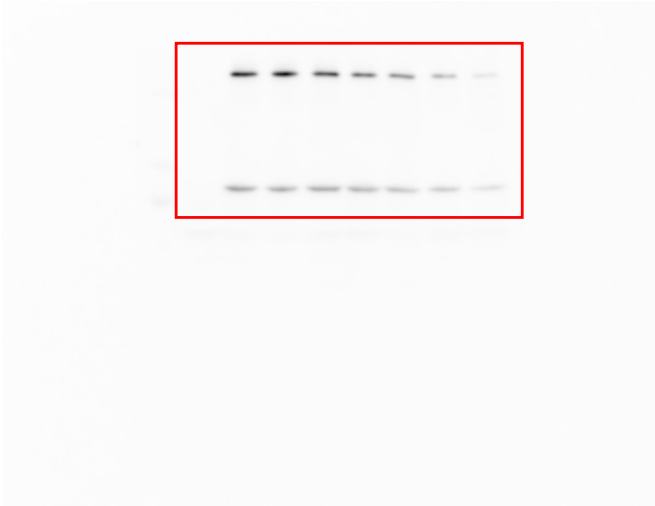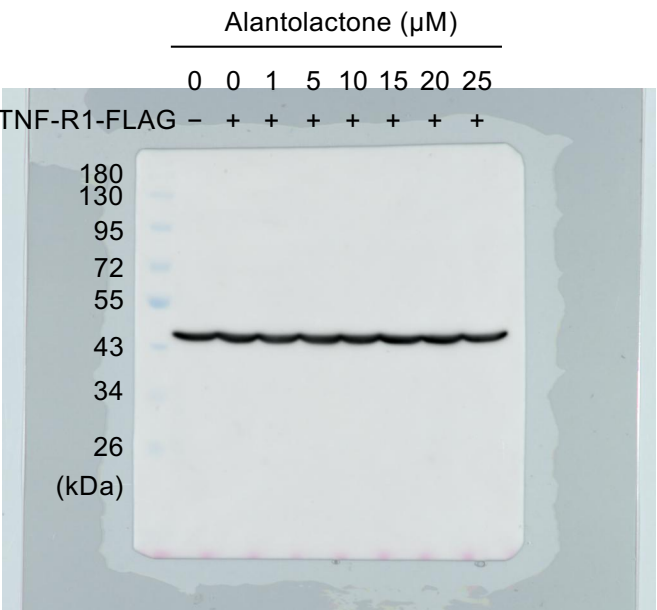

WB: β-Actin (reprobed)

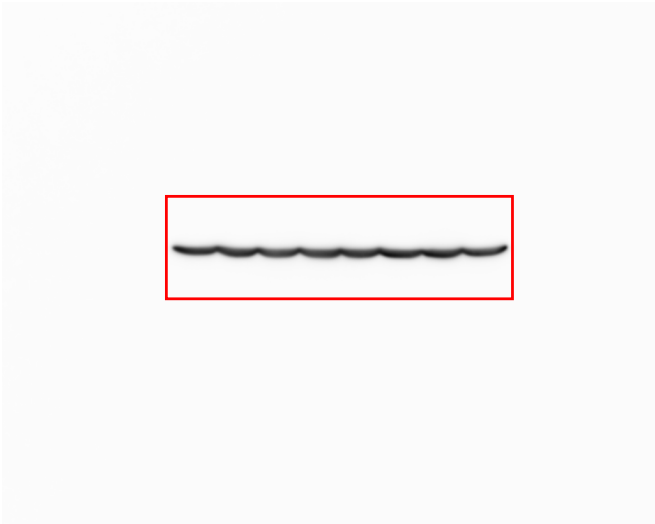

Figure S18: Original blots (1) in Figure 3B

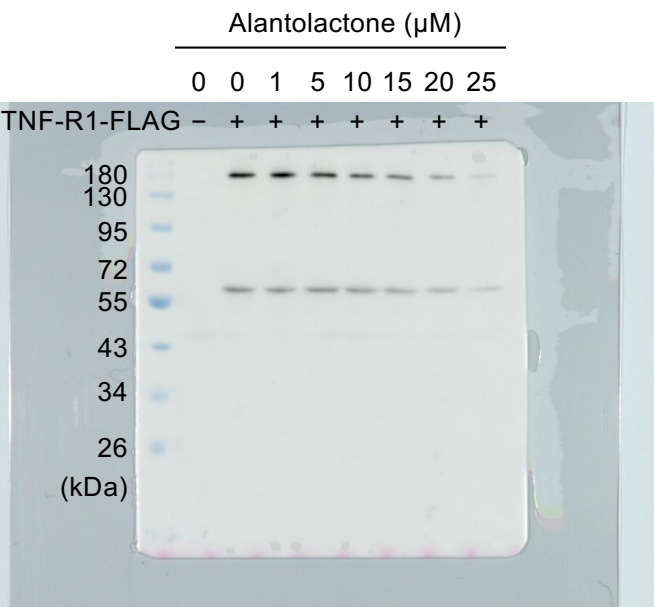

WB: TNF-R1

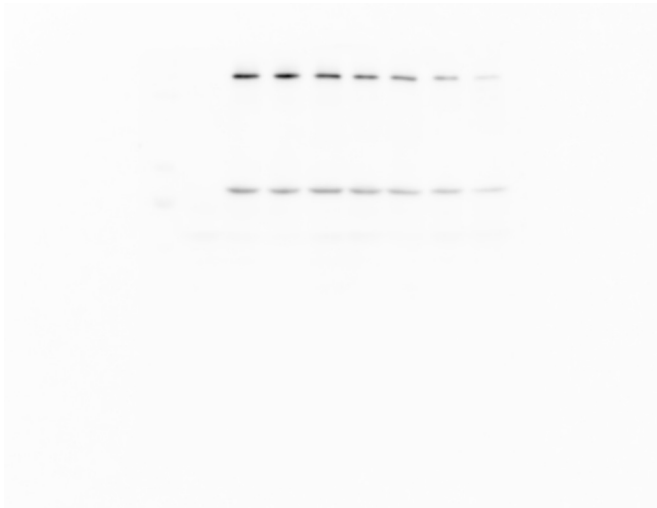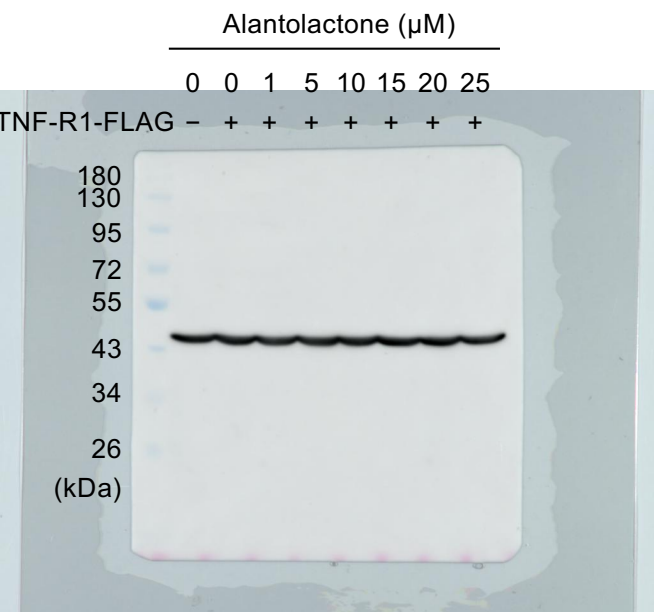

WB:  $\beta$ -Actin (reprobed)

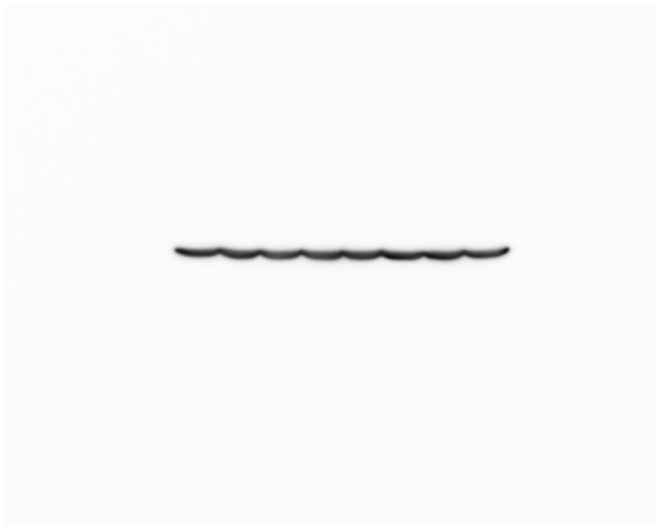

Figure S19: Original blots (2) in Figure 3B

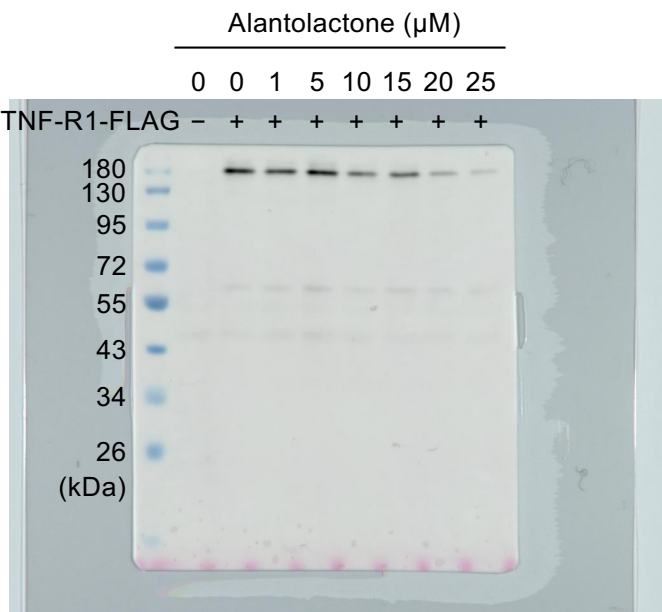

WB: TNF-R1

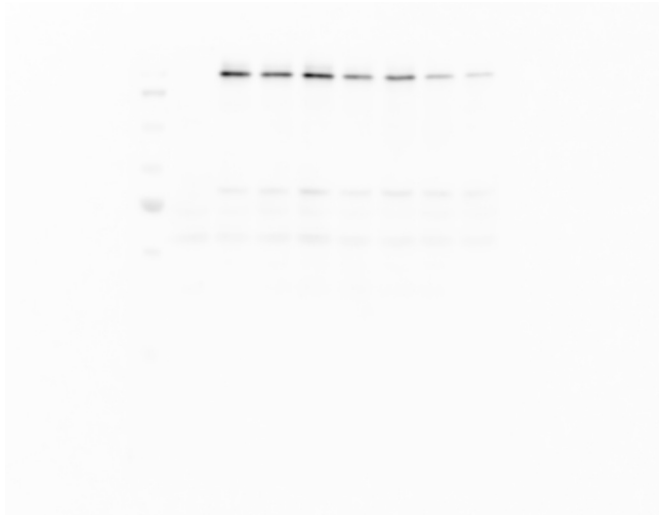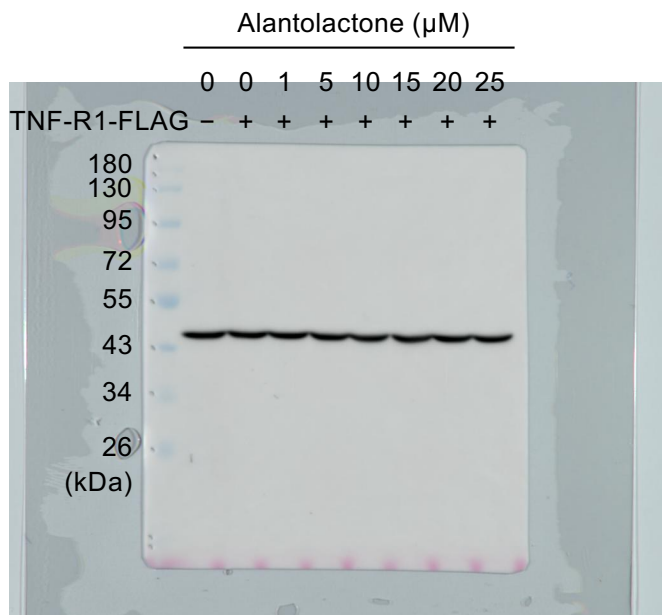

WB:  $\beta$ -Actin (reprobed)

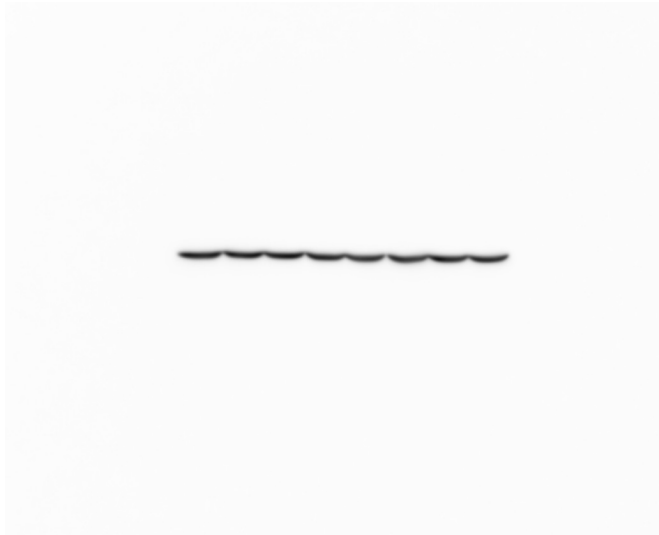

Figure S20: Original blots (3) in Figure 3B

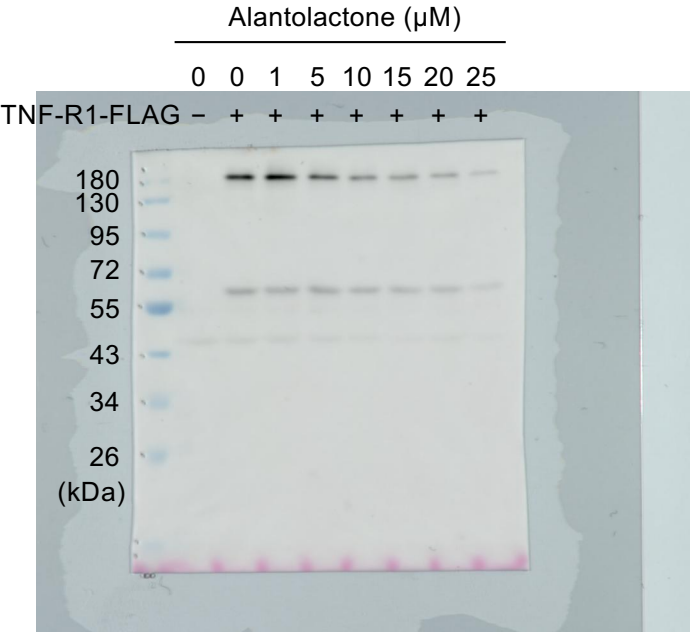

WB: TNF-R1

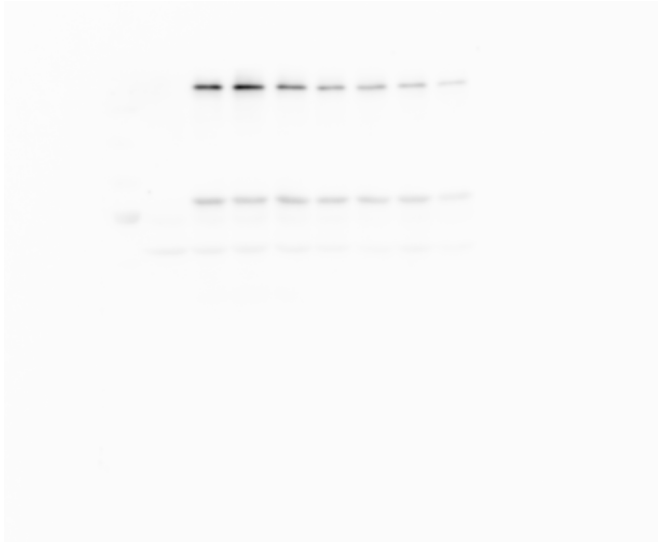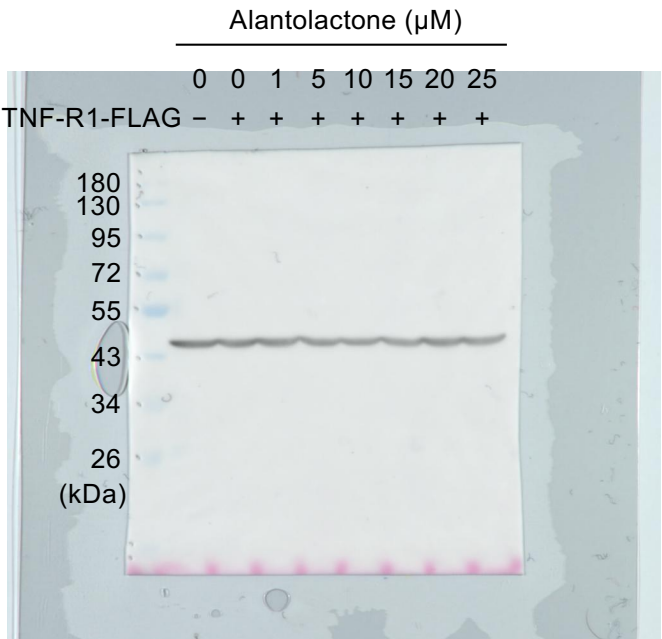

WB:  $\beta$ -Actin (reprobed)

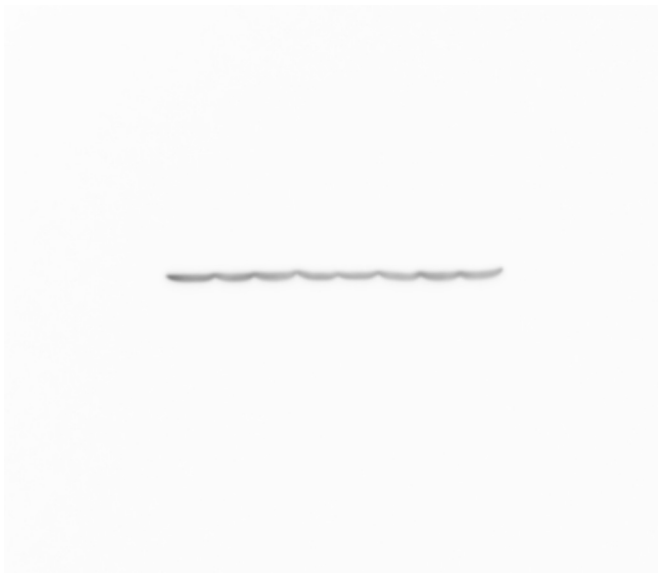



Figure S21: Original blots in Figure 4A

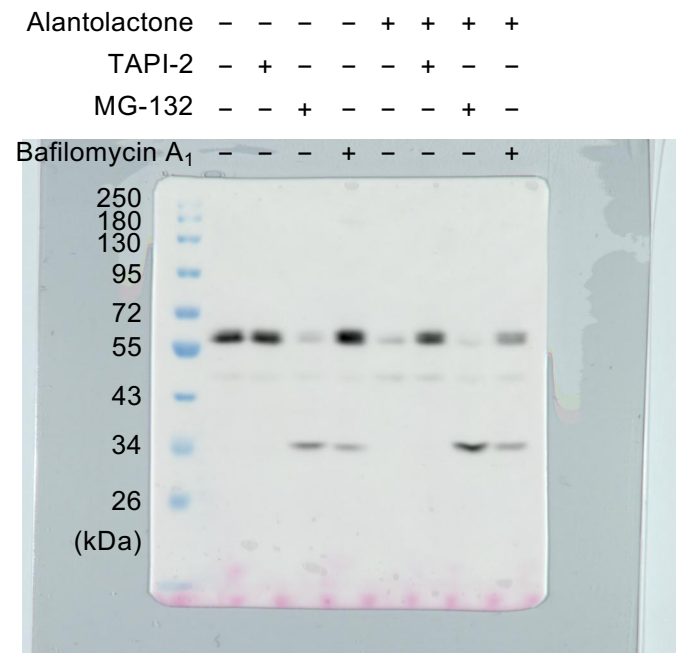

WB: TNF-R1

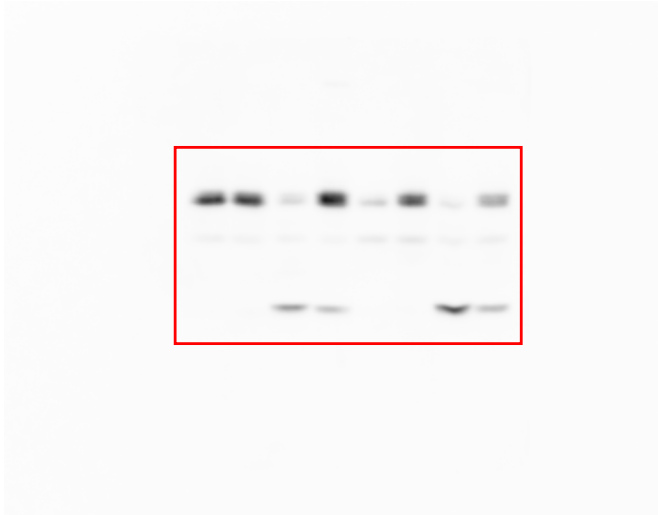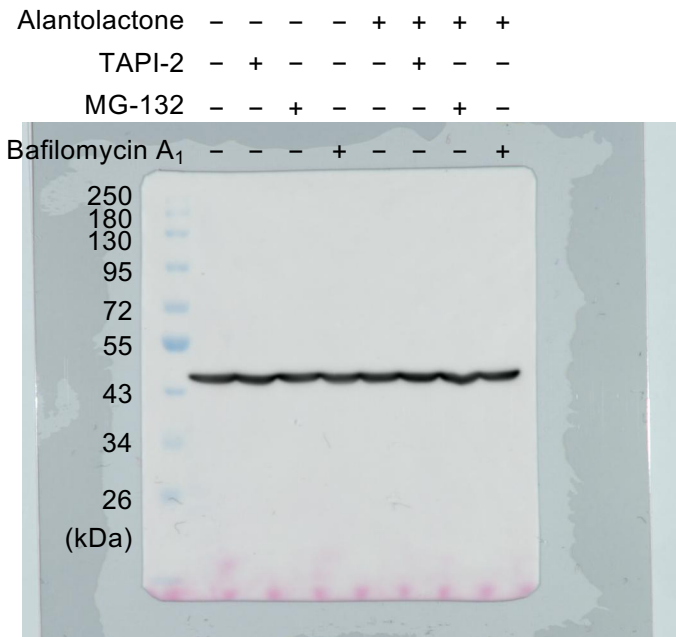

WB:  $\beta$ -Actin (reprobed)

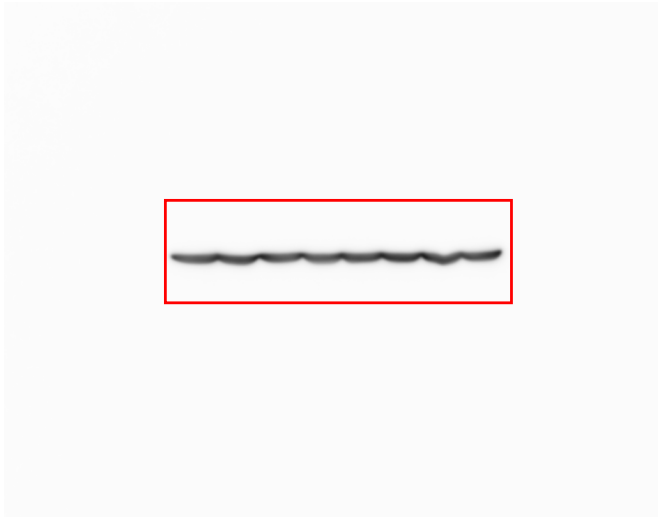

Figure S22: Original blots (1) in Figure 4B

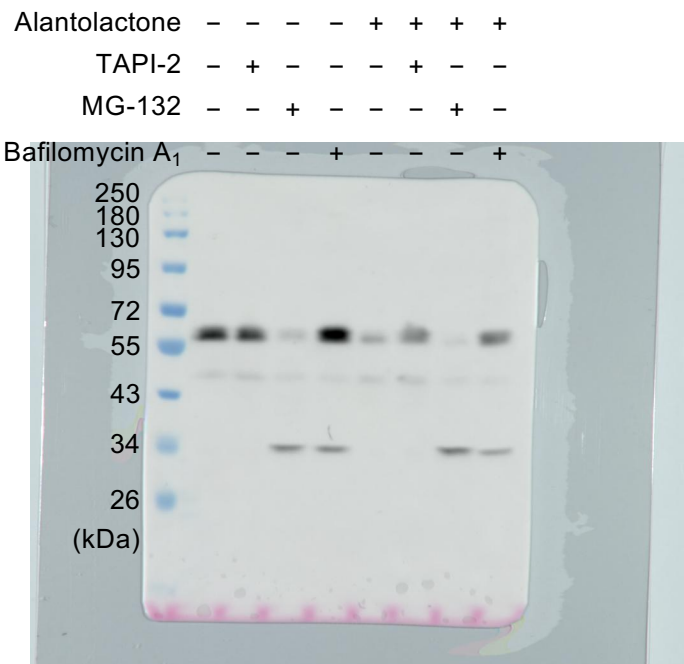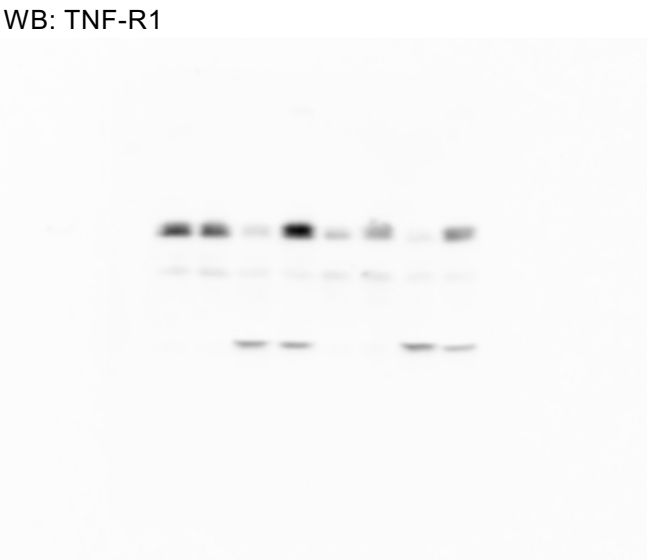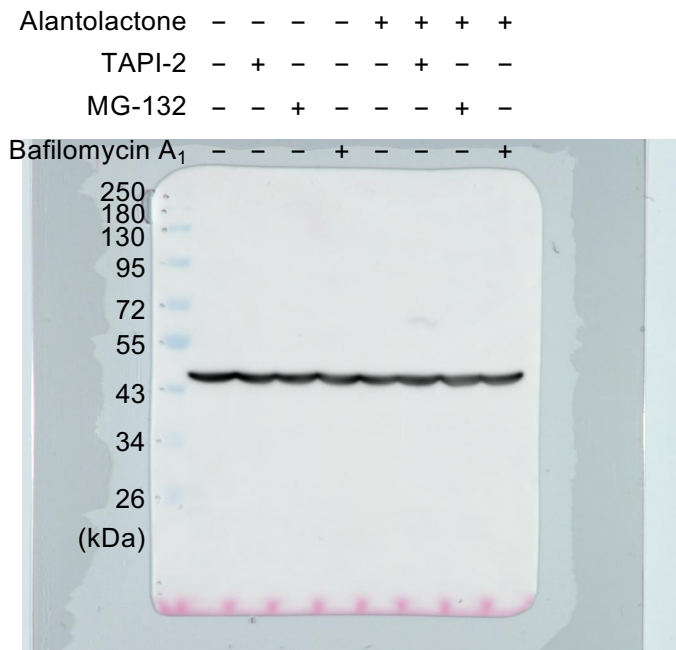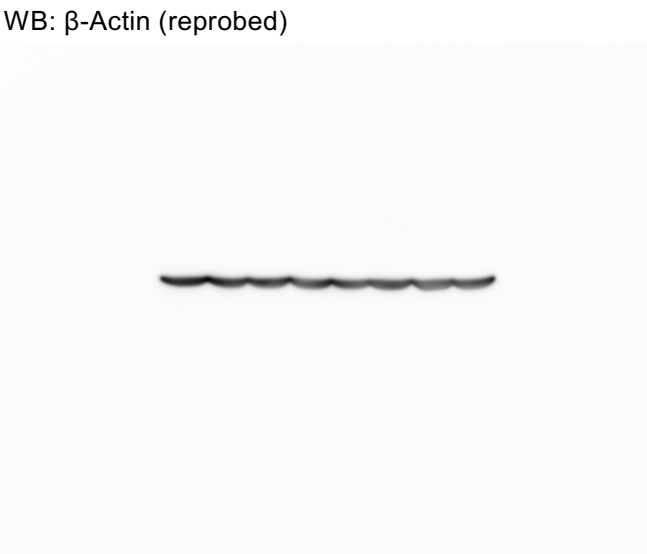

Figure S23: Original blots (2) in Figure 4B

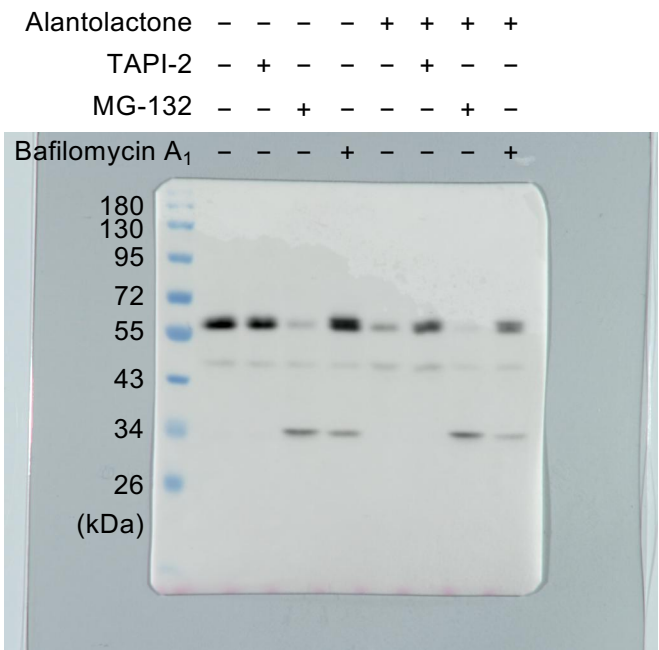

WB: TNF-R1

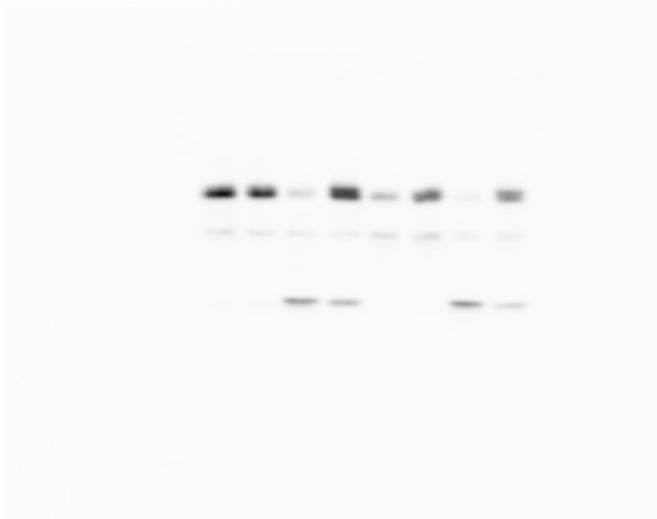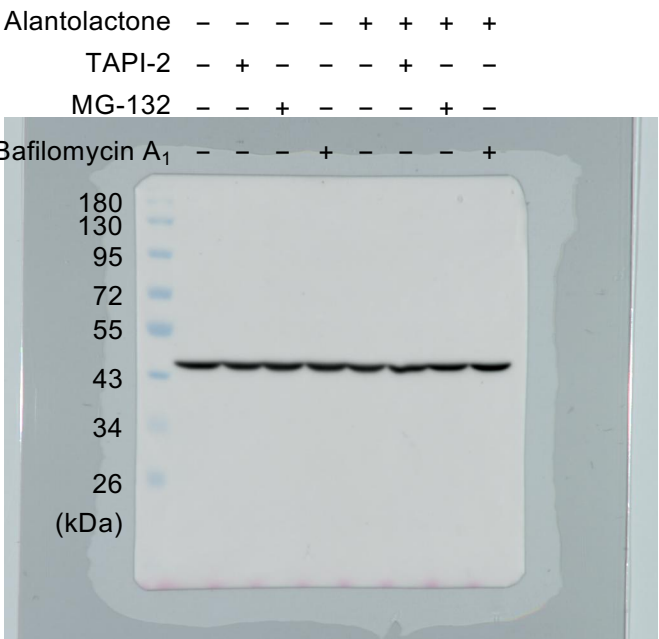

WB:  $\beta$ -Actin (reprobed)

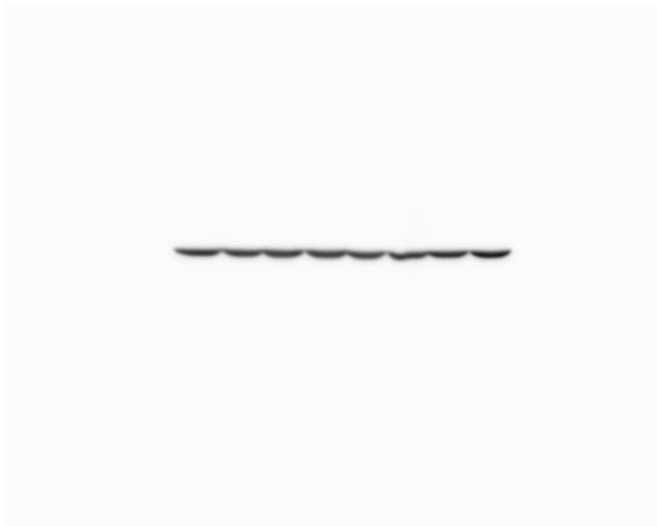

Figure S24: Original blots (3) in Figure 4B

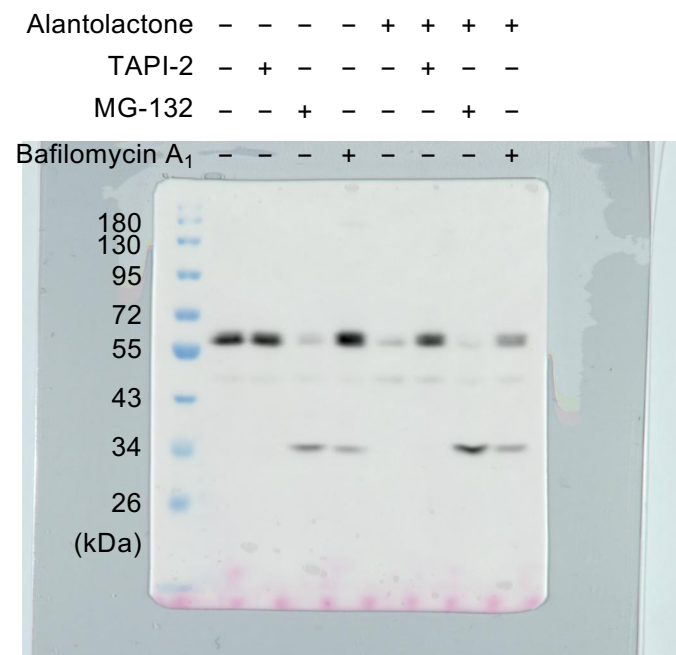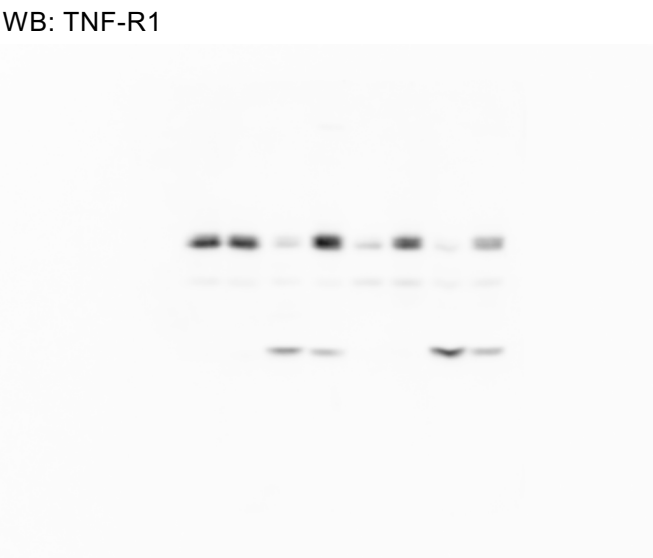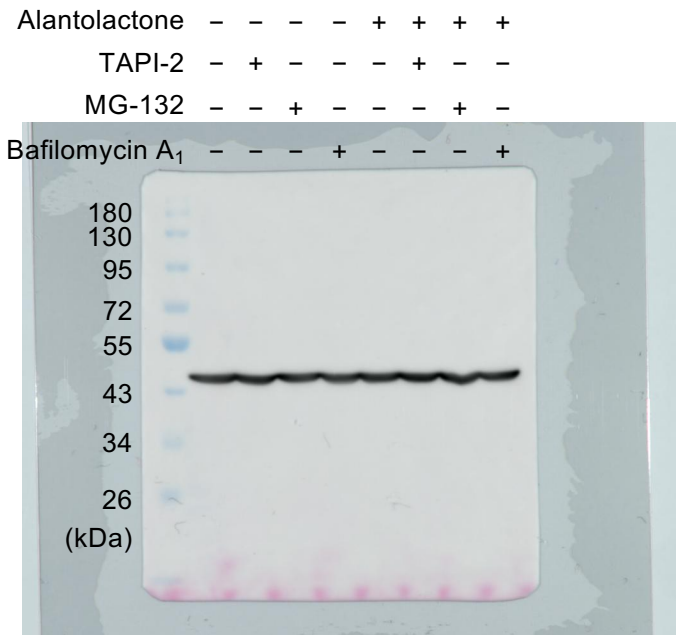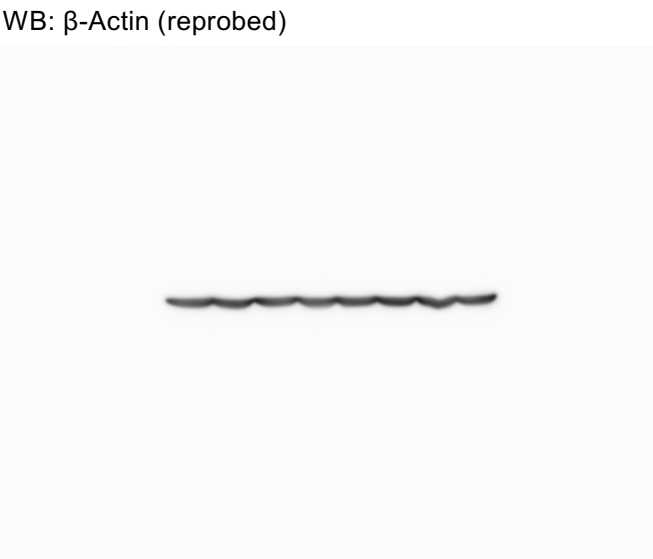

Figure S25: Original blots in Figure 5A

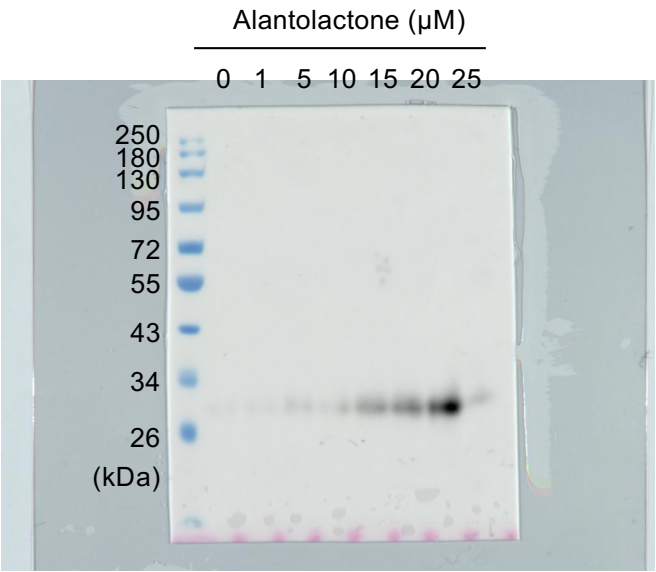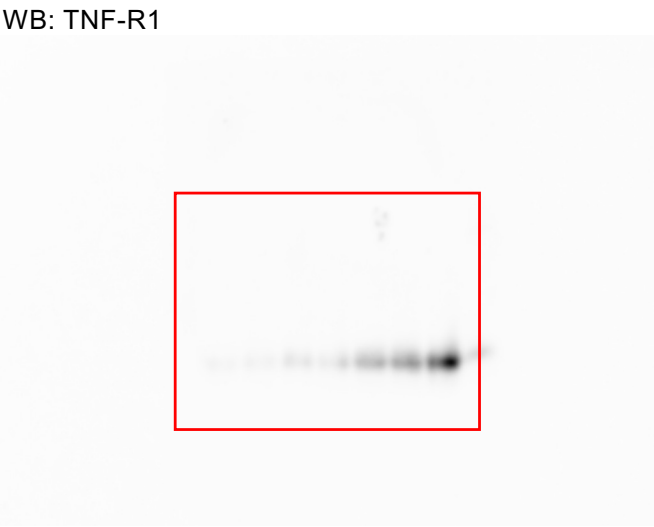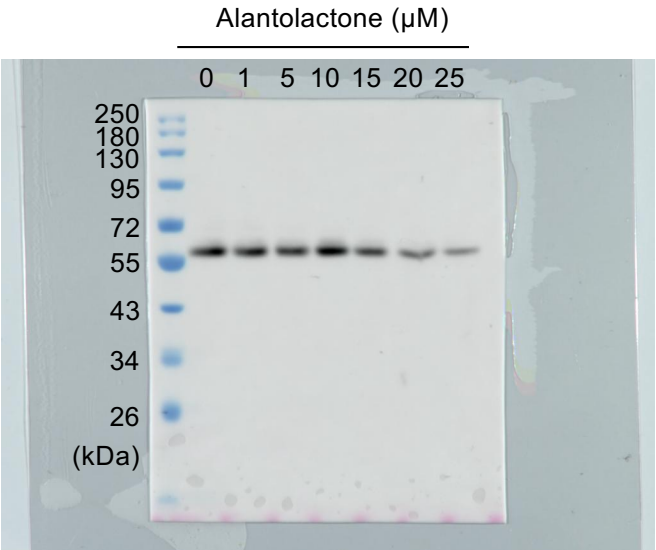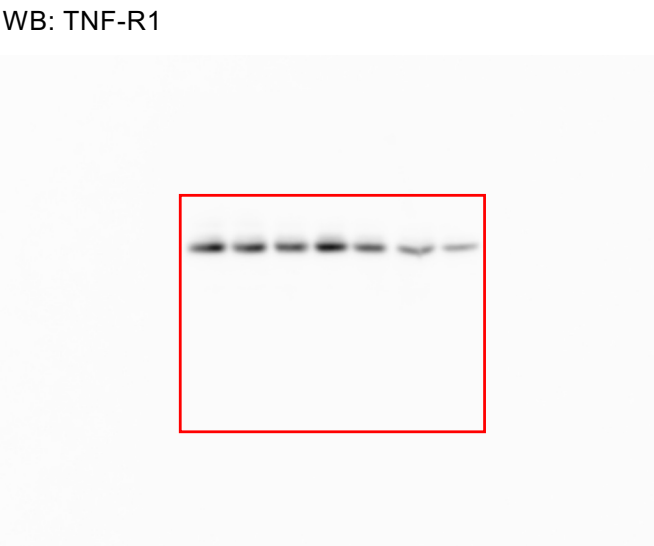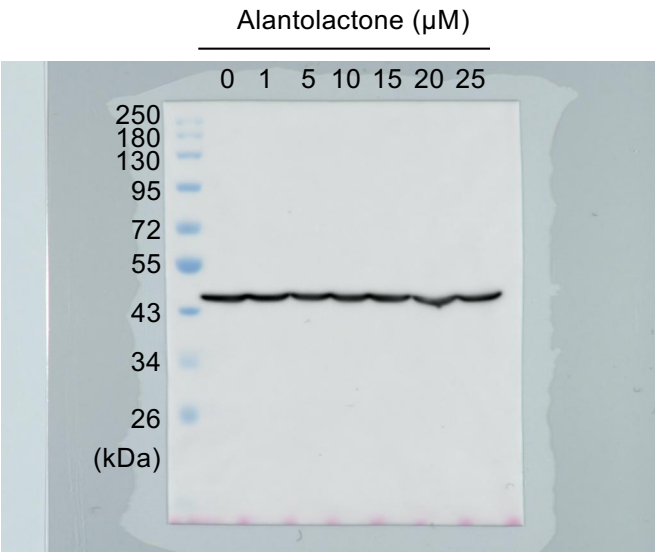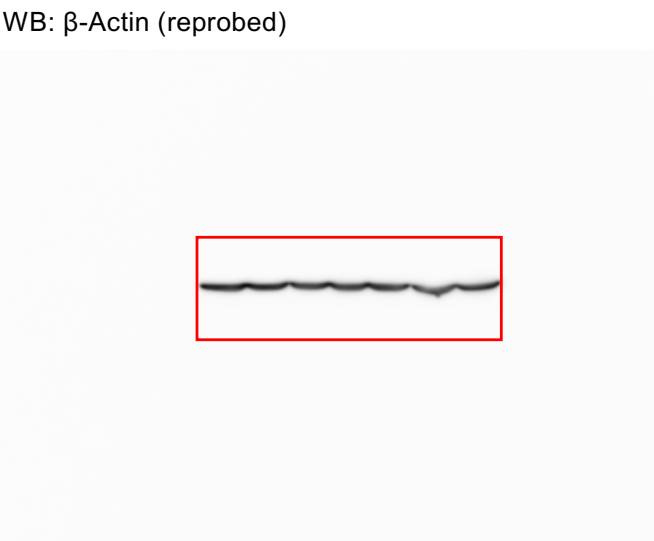

**Figure S26: Original blots (1) in Figure 5B,C**

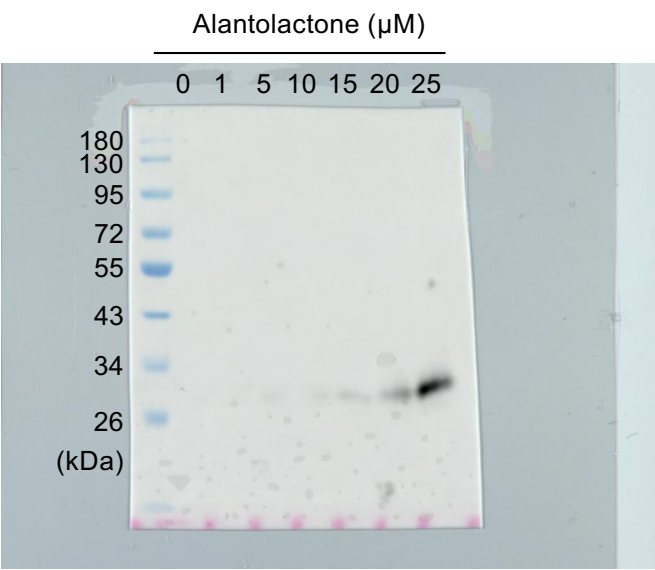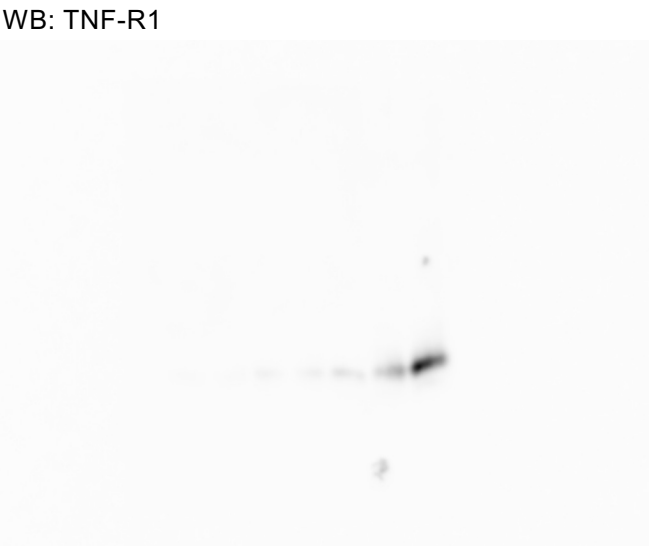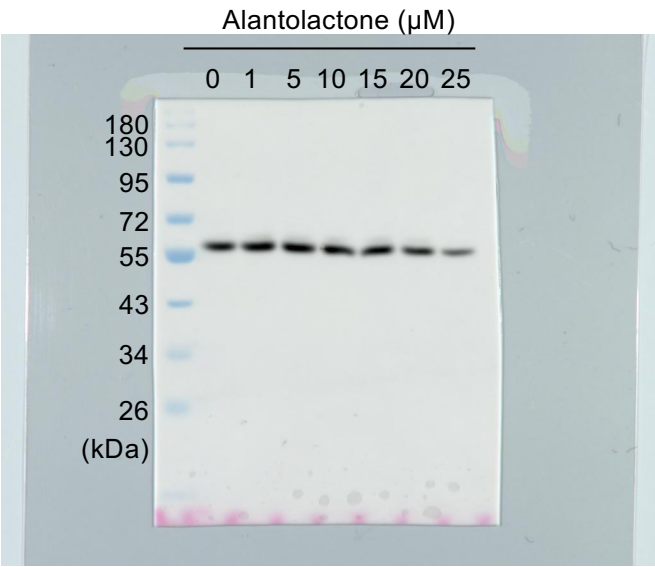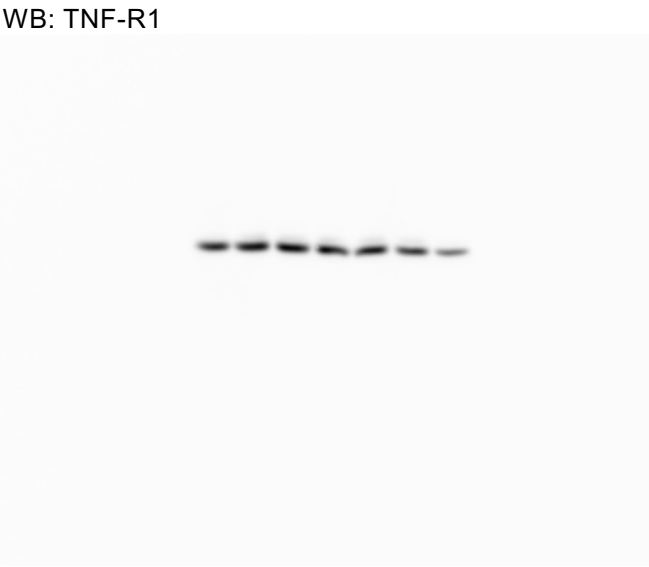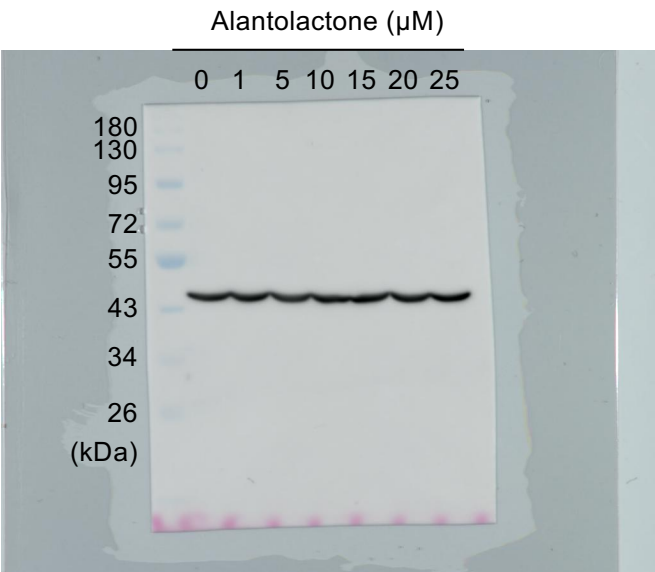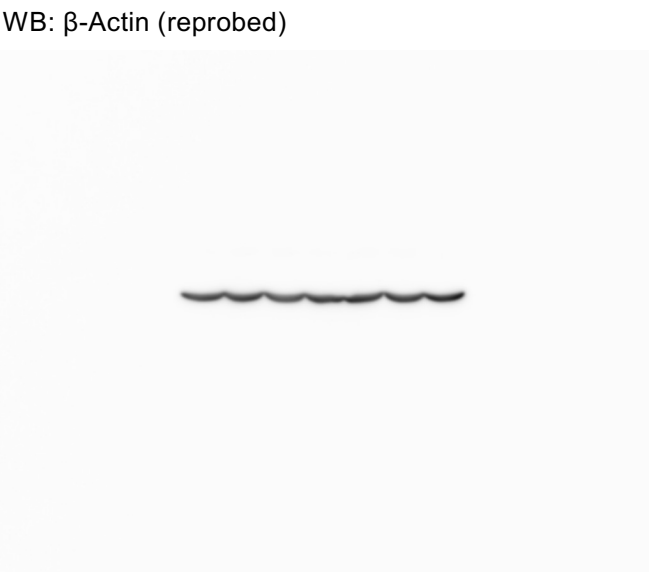

Figure S27: Original blots (2) in Figure 5B,C

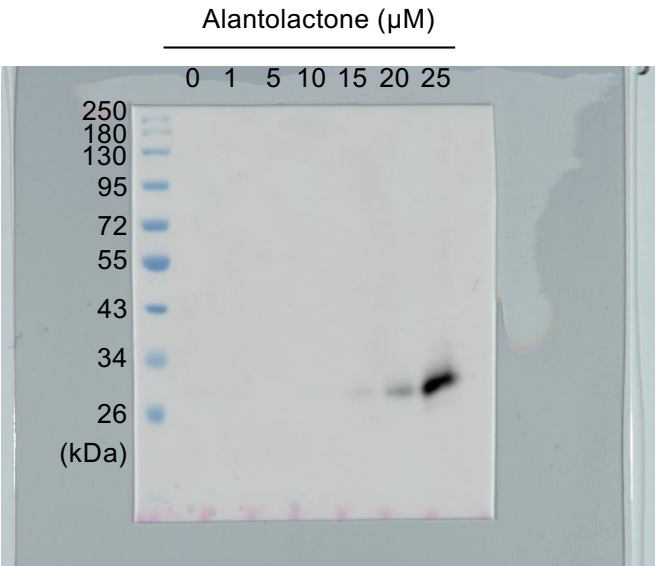

WB: TNF-R1

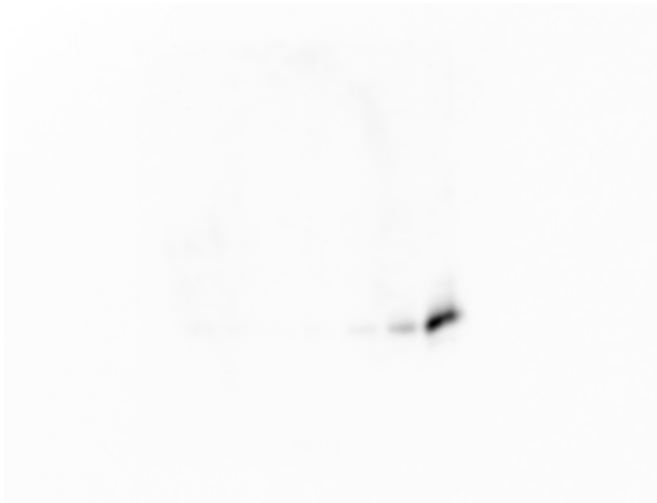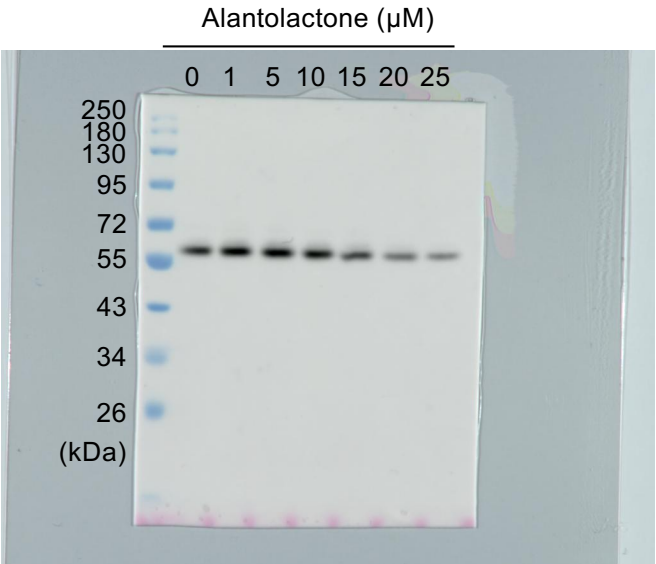

WB: TNF-R1

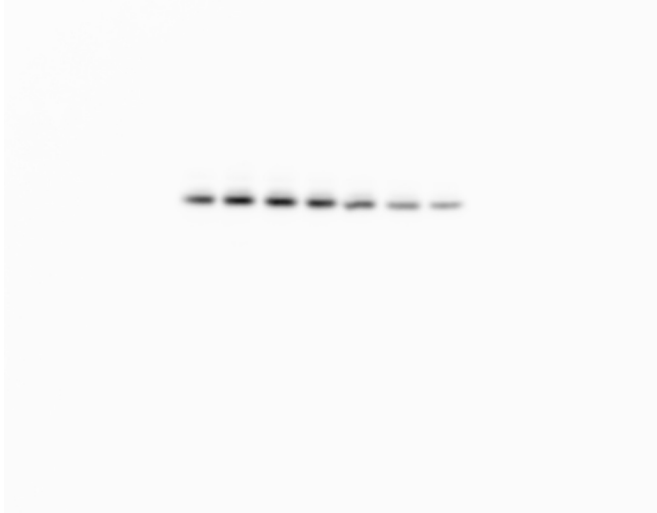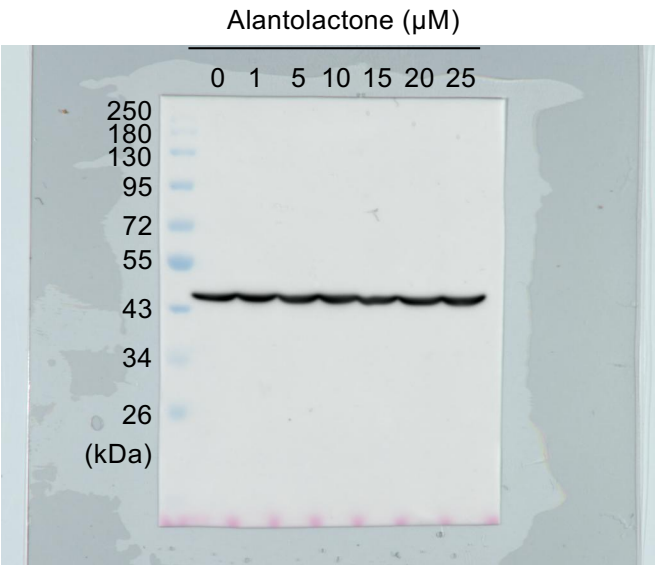

WB:  $\beta$ -Actin (reprobed)

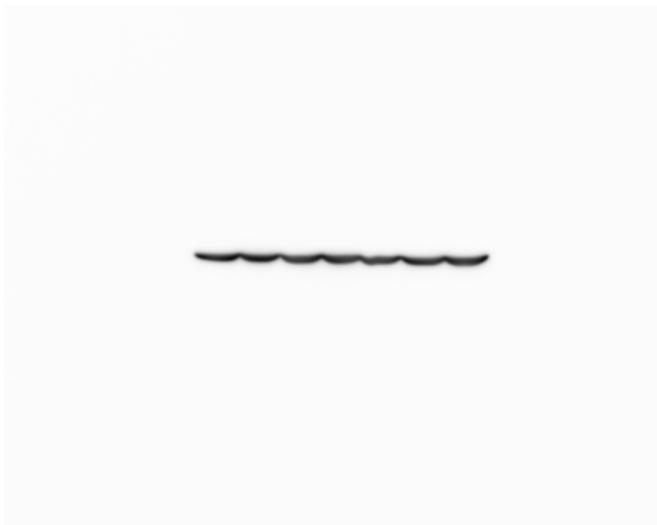

**Figure S28: Original blots (3) in Figure 5B,C**

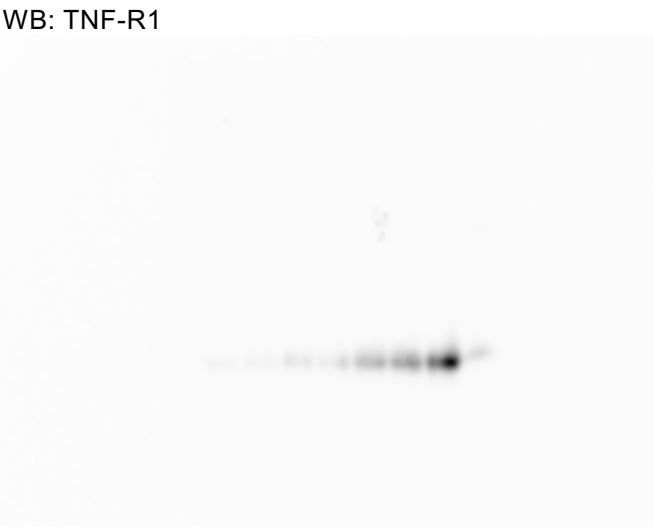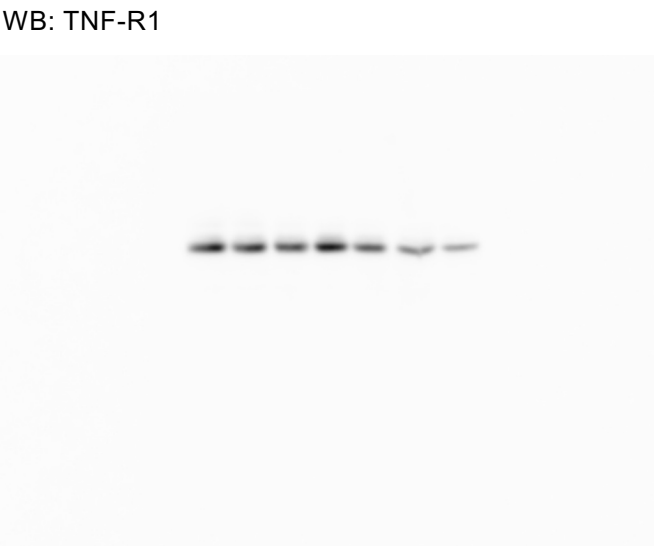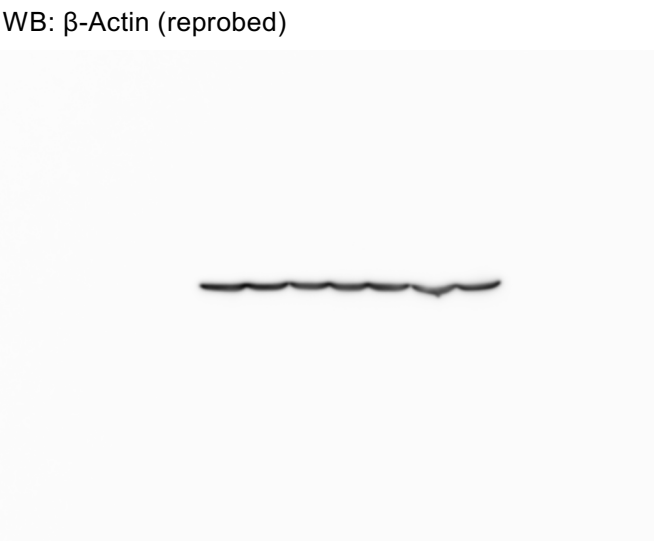



Figure S29: Original blots in Figure 6A

|               |   |   |   |   |   |   |   |   |
|---------------|---|---|---|---|---|---|---|---|
| Alantolactone | - | - | - | - | + | + | + | + |
| Glutathione   | - | + | - | - | - | + | - | - |
| NAC           | - | - | + | - | - | - | + | - |
| L-Cysteine    | - | - | - | + | - | - | - | + |

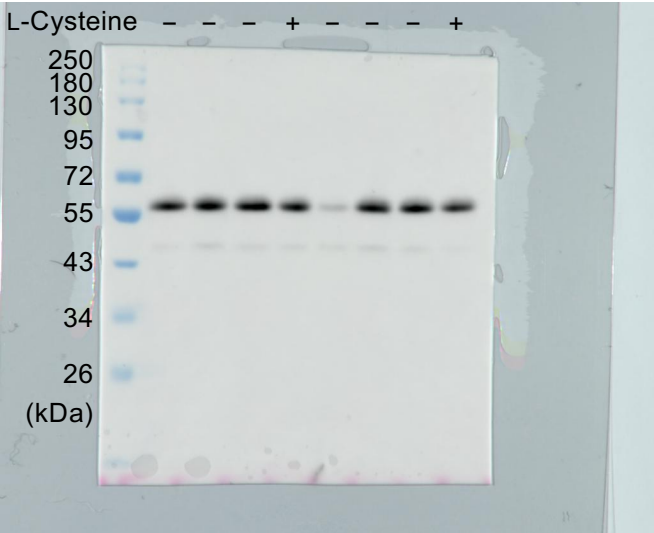

WB: TNF-R1

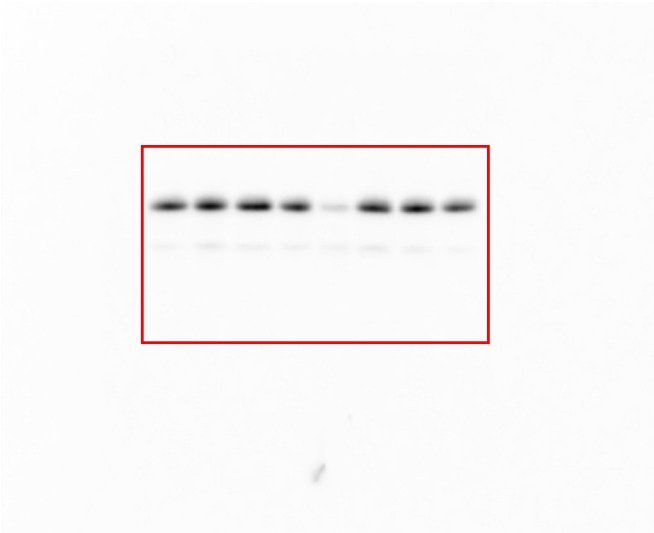

|               |   |   |   |   |   |   |   |   |
|---------------|---|---|---|---|---|---|---|---|
| Alantolactone | - | - | - | - | + | + | + | + |
| Glutathione   | - | + | - | - | - | + | - | - |
| NAC           | - | - | + | - | - | - | + | - |
| L-Cysteine    | - | - | - | + | - | - | - | + |

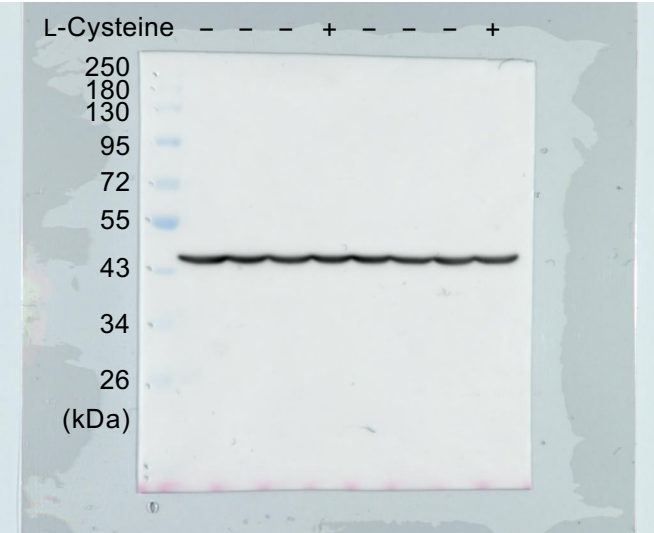

WB:  $\beta$ -Actin (reprobed)

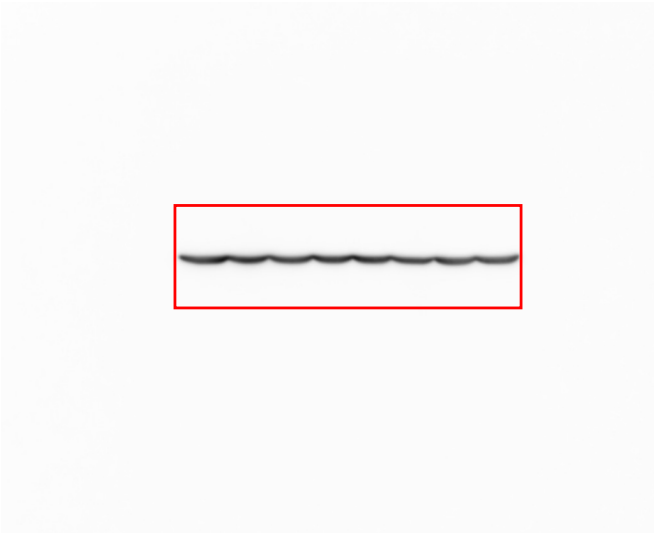

Figure S30: Original blots (1) in Figure 6B

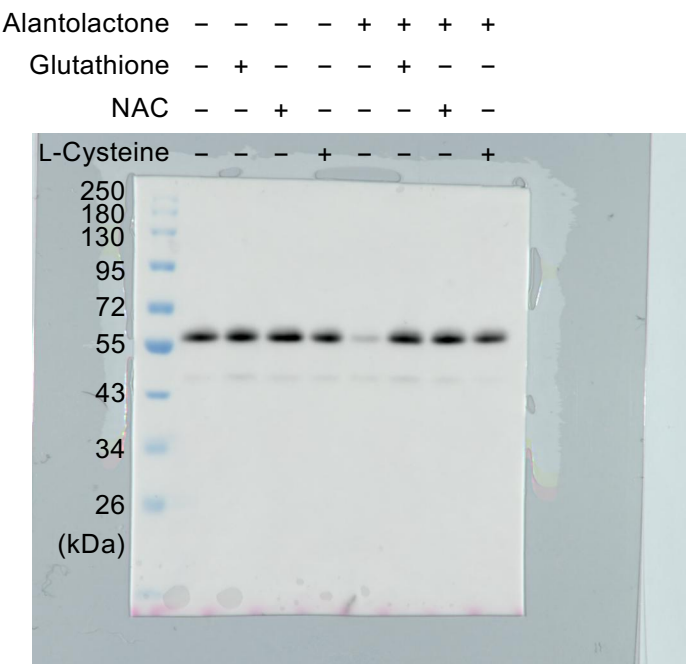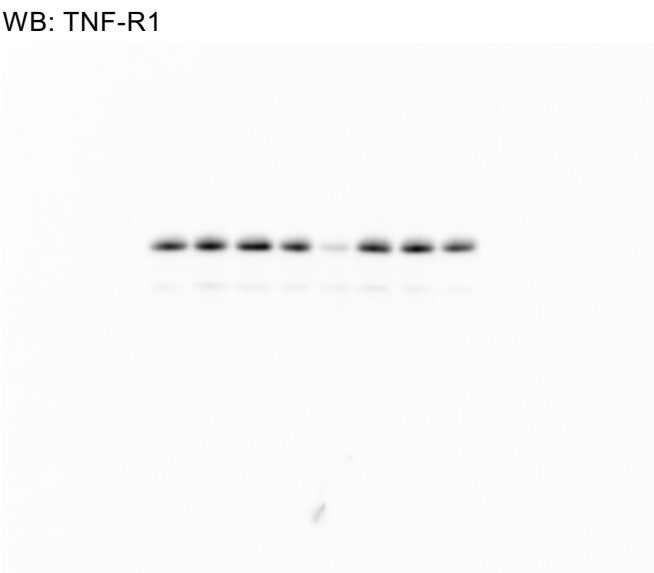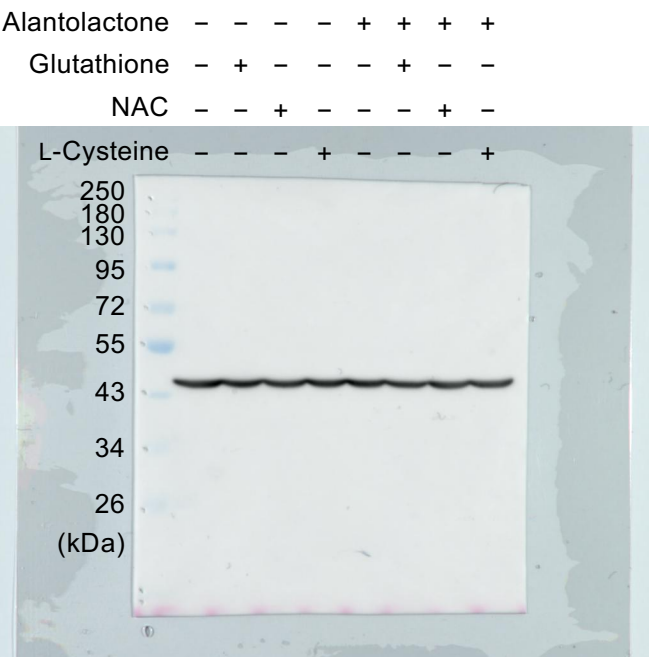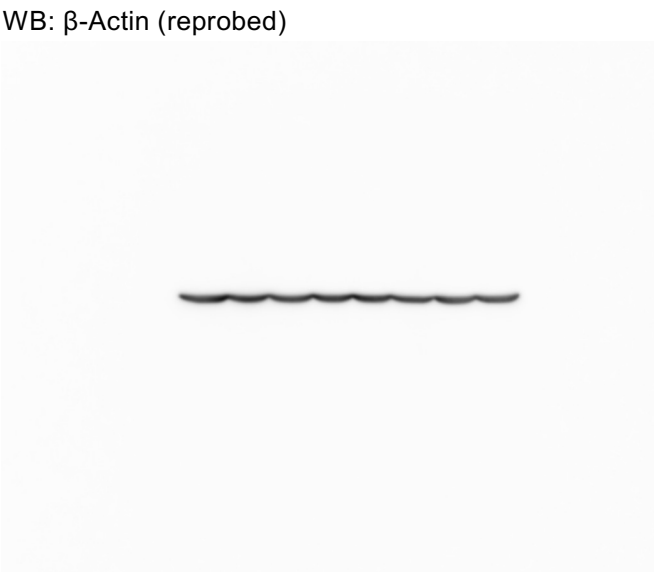

Figure S31: Original blots (2) in Figure 6B

|               |   |   |   |   |   |   |   |   |
|---------------|---|---|---|---|---|---|---|---|
| Alantolactone | - | - | - | - | + | + | + | + |
| Glutathione   | - | + | - | - | - | + | - | - |
| NAC           | - | - | + | - | - | - | + | - |
| L-Cysteine    | - | - | - | + | - | - | - | + |

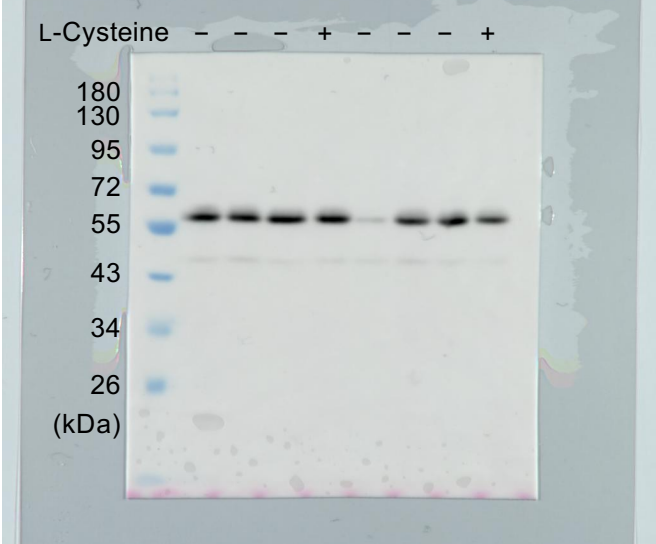

WB: TNF-R1

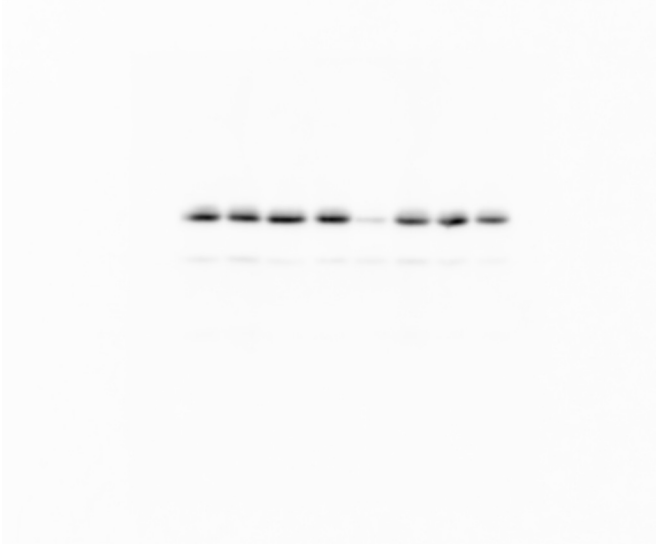

|               |   |   |   |   |   |   |   |   |
|---------------|---|---|---|---|---|---|---|---|
| Alantolactone | - | - | - | - | + | + | + | + |
| Glutathione   | - | + | - | - | - | + | - | - |
| NAC           | - | - | + | - | - | - | + | - |
| L-Cysteine    | - | - | - | + | - | - | - | + |

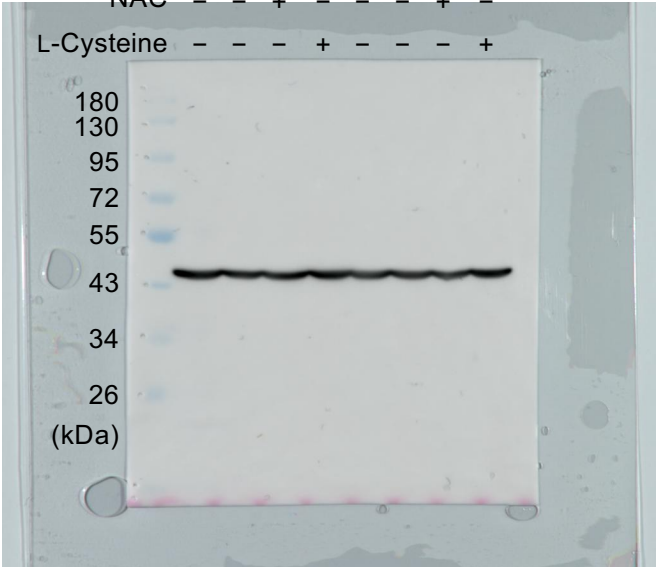

WB:  $\beta$ -Actin (reprobed)

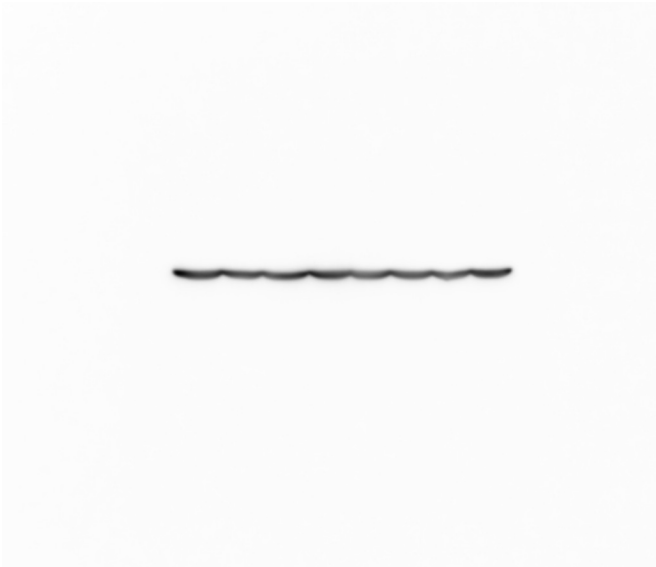

Figure S32: Original blots (3) in Figure 6B

Alantolactone - - - - + + + +  
Glutathione - + - - - + - -  
NAC - - + - - - + -

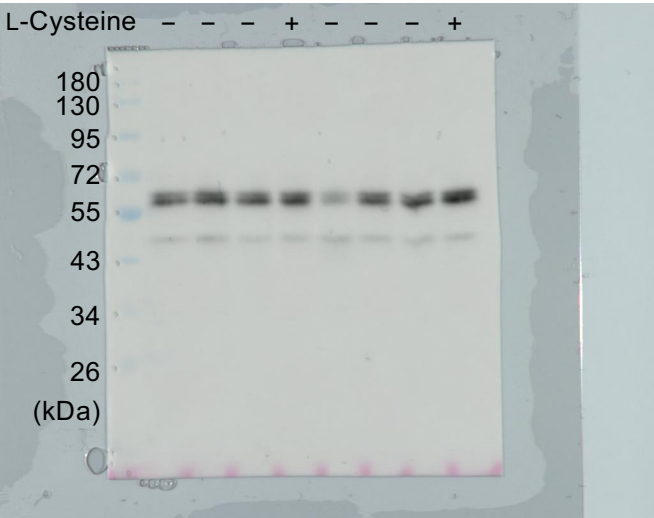

WB: TNF-R1

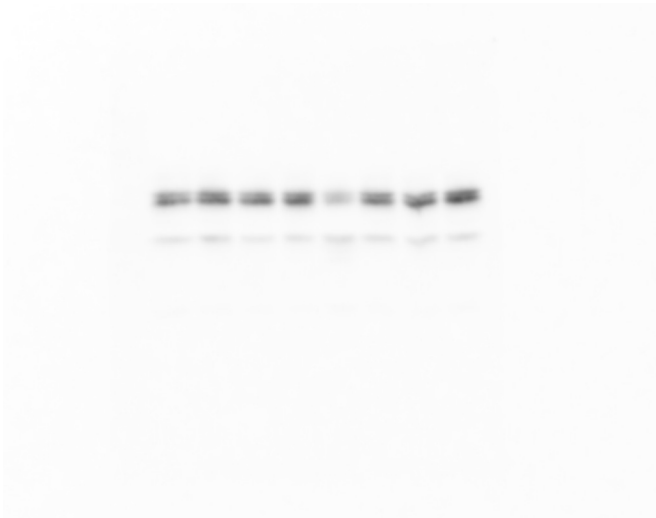

Alantolactone - - - - + + + +  
Glutathione - + - - - + - -  
NAC - - + - - - + -

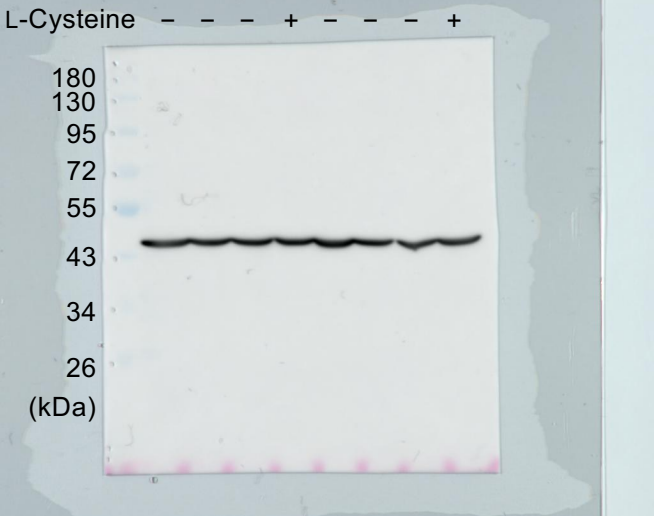

WB:  $\beta$ -Actin (reprobed)

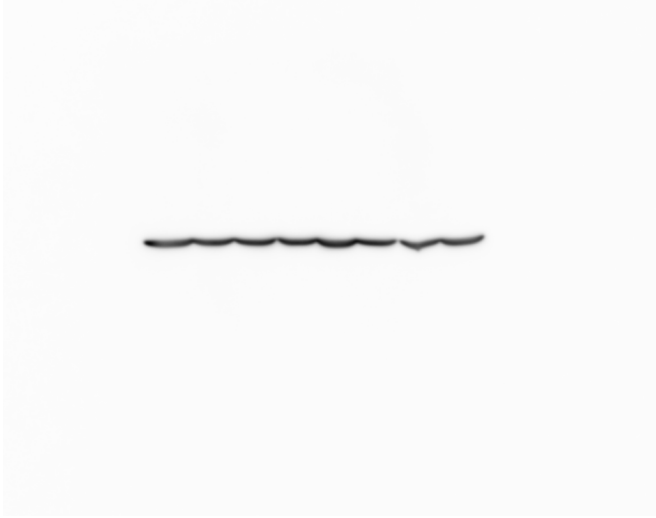

Figure S33: Original blots in Figure 8A

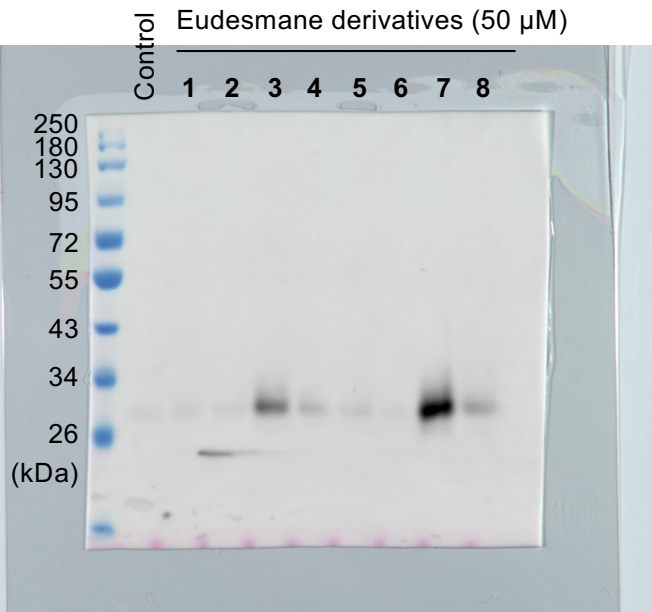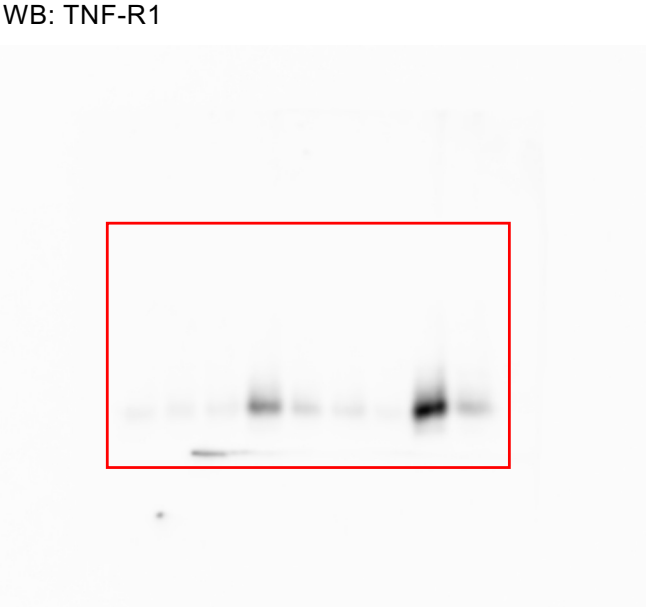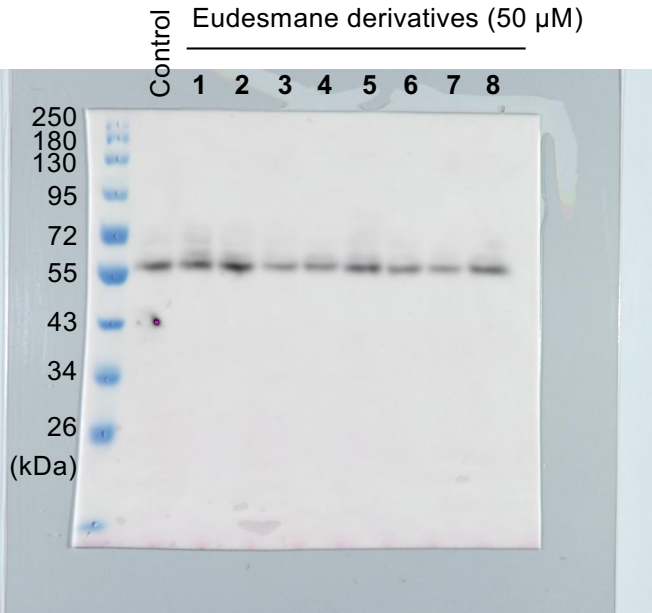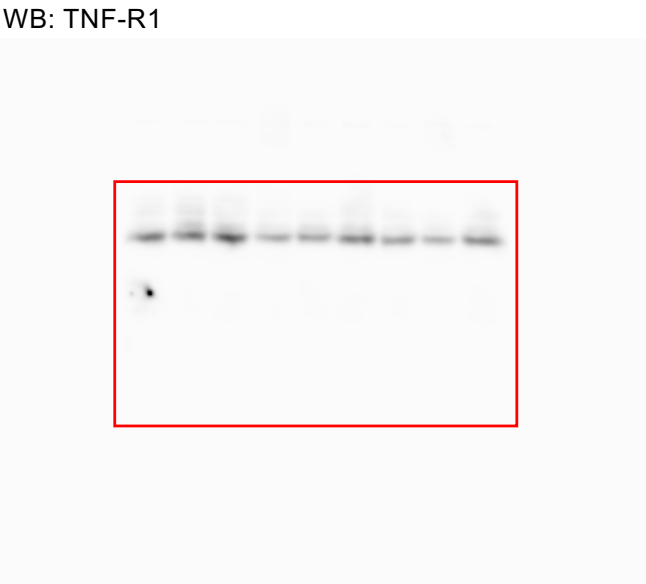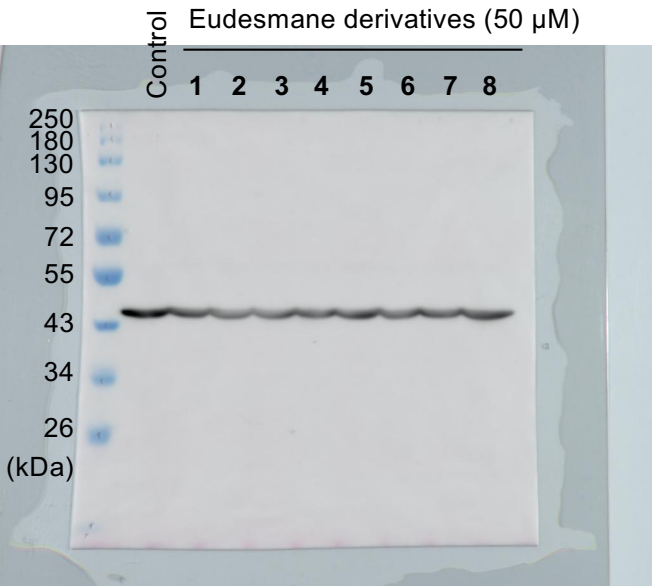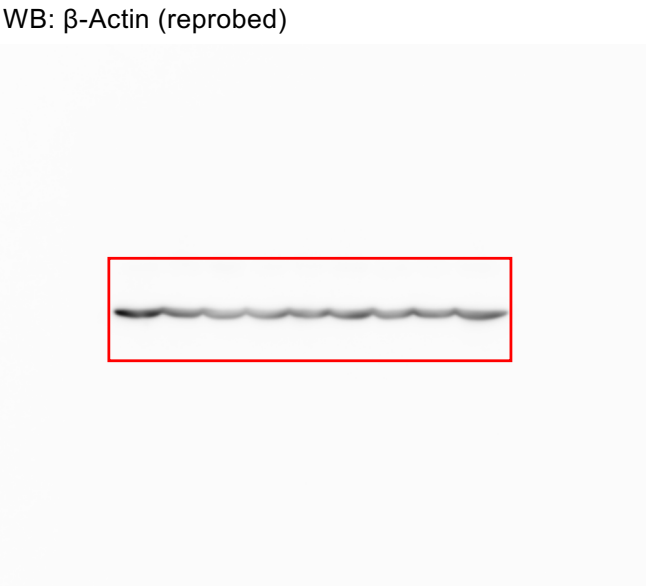

Figure S34: Original blots (1) in Figure 8B,C

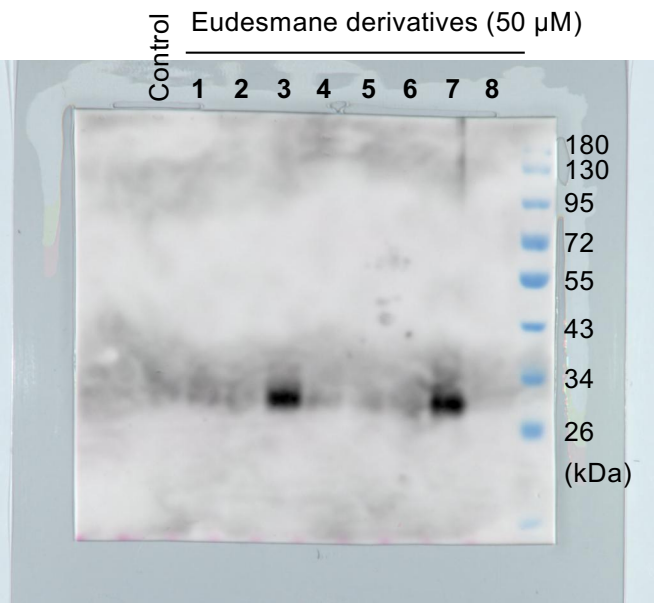

WB: TNF-R1

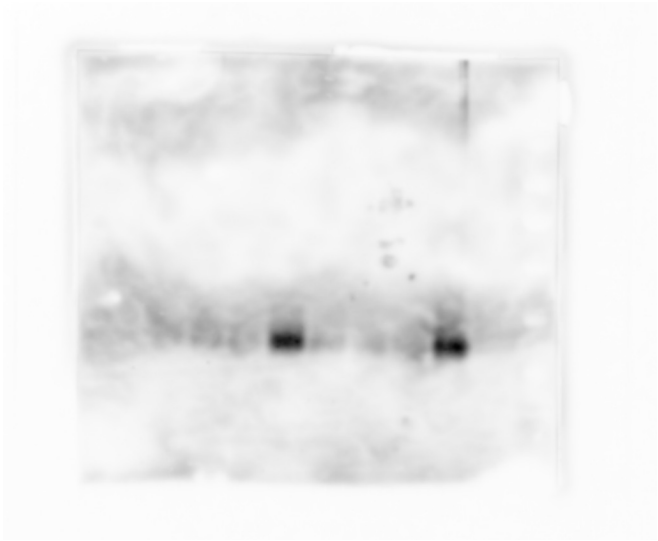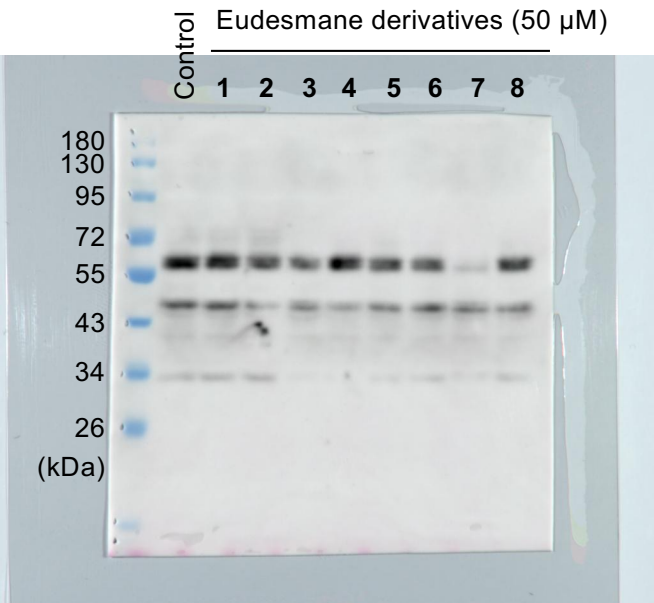

WB: TNF-R1

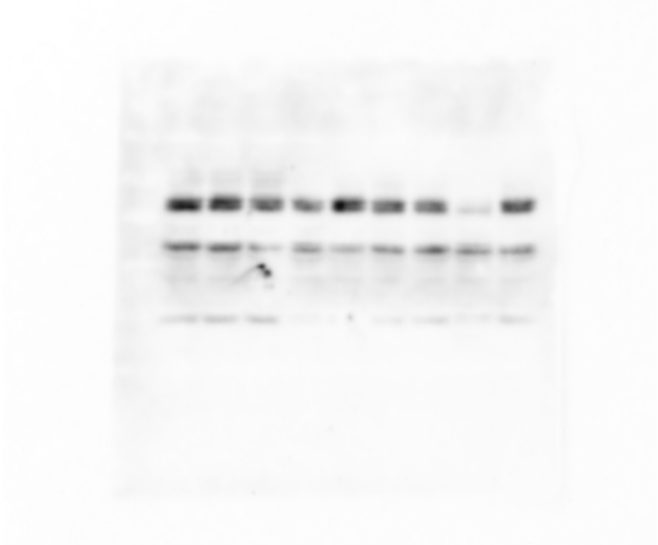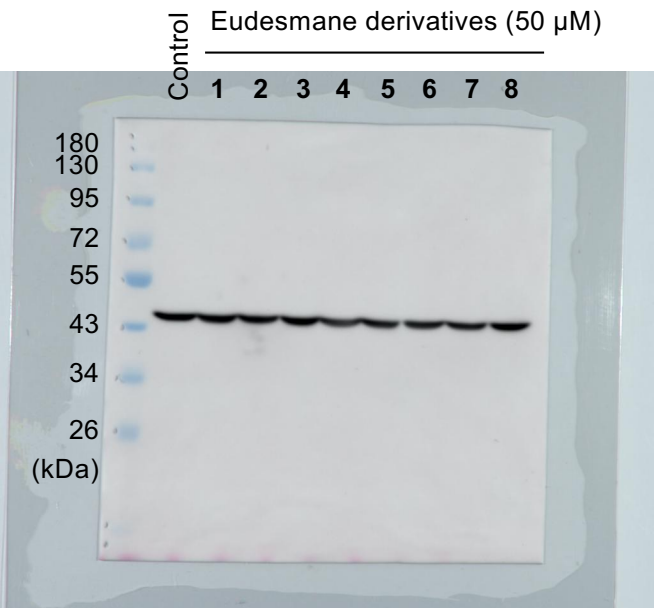

WB:  $\beta$ -Actin (reprobed)

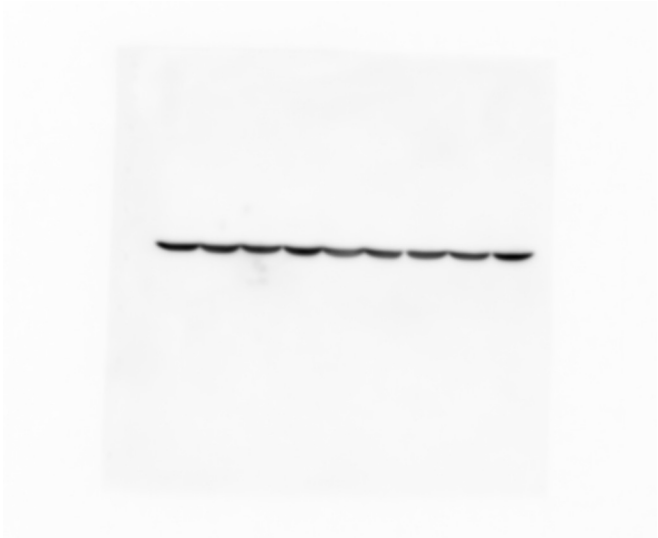

Figure S35: Original blots (2) in Figure 8B,C

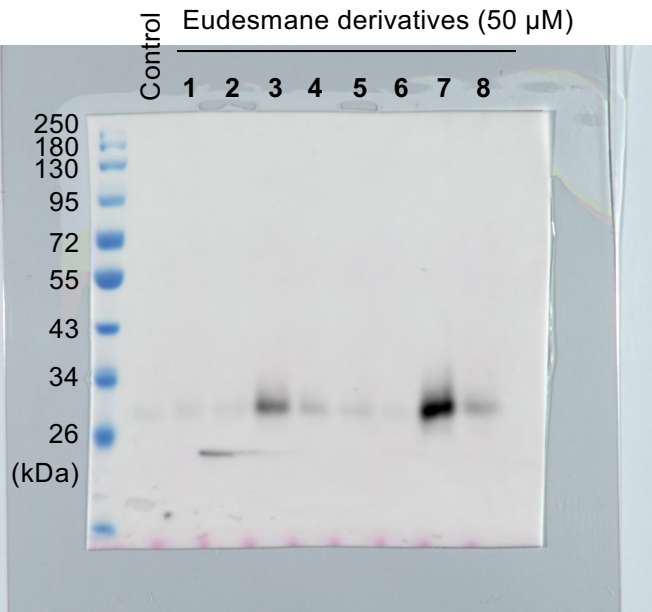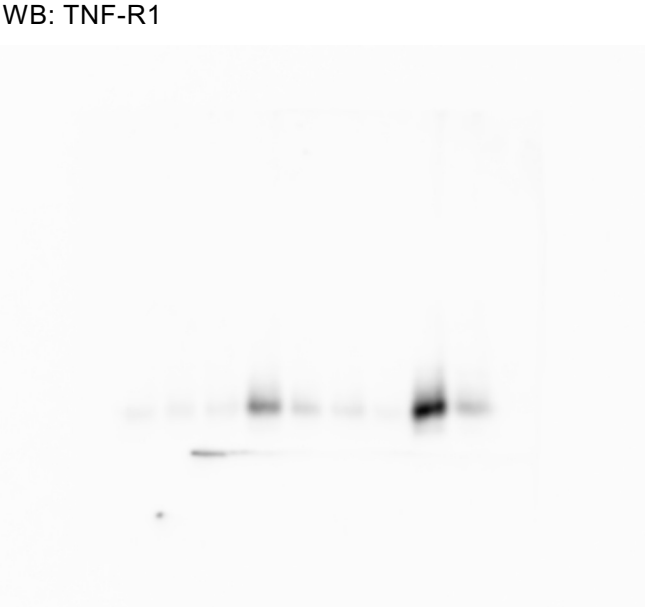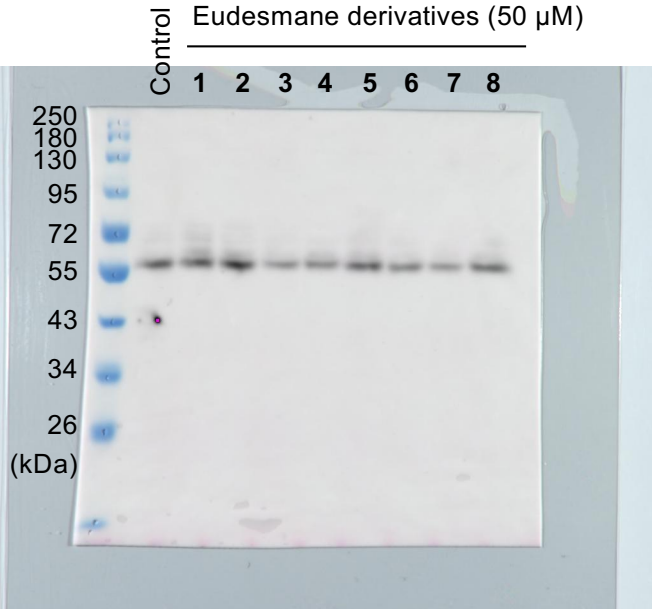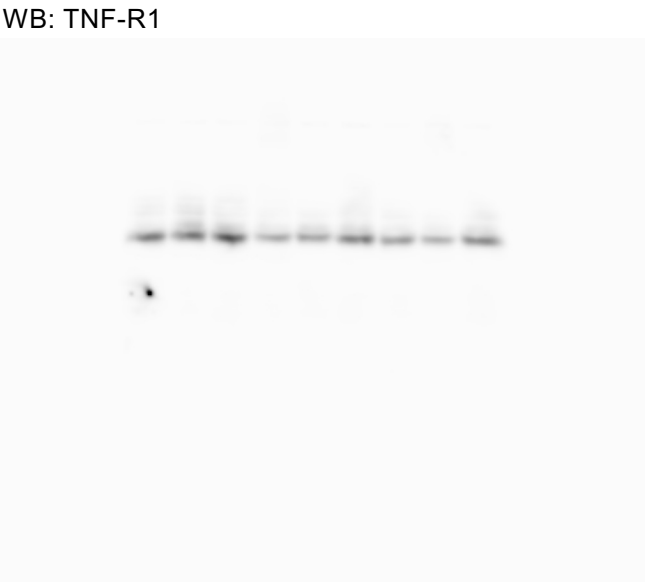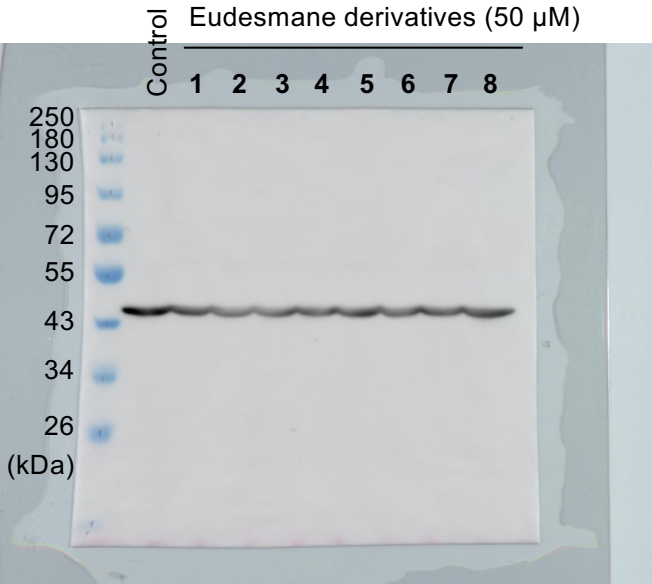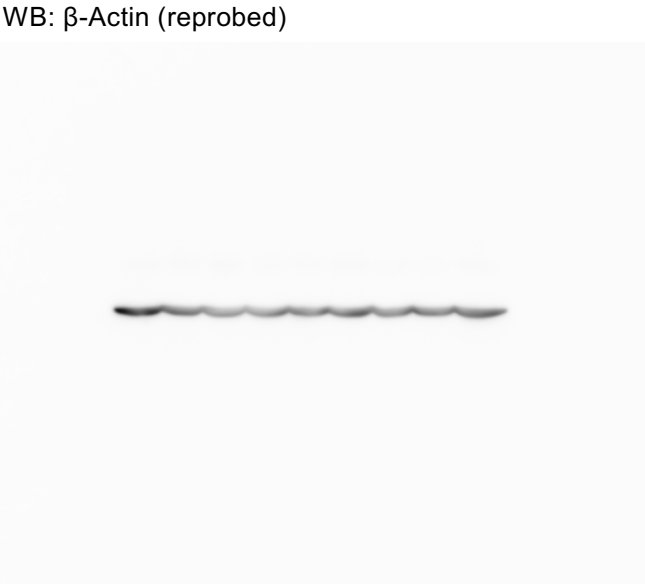

Figure S36: Original blots (3) in Figure 8B,C

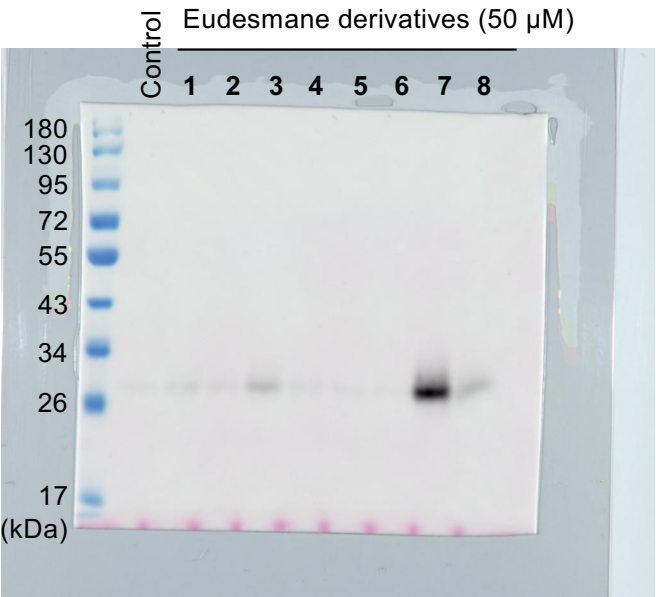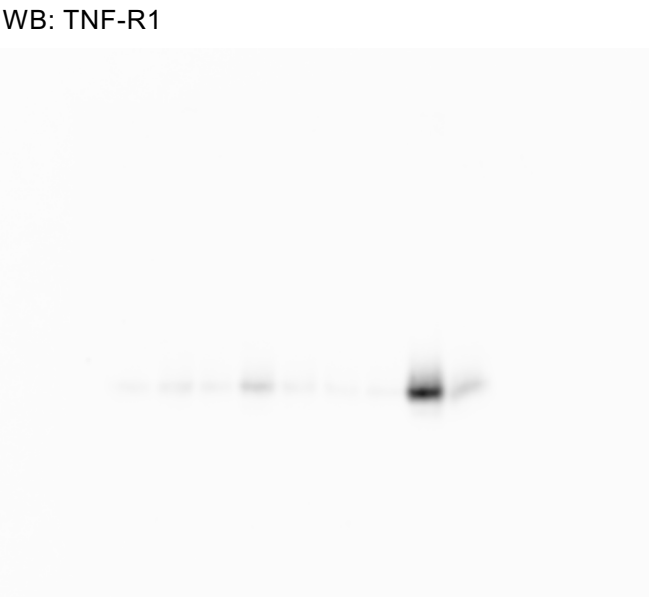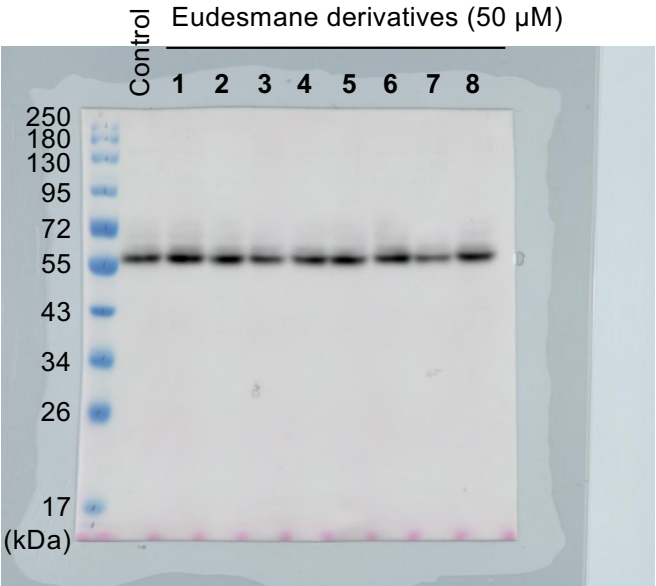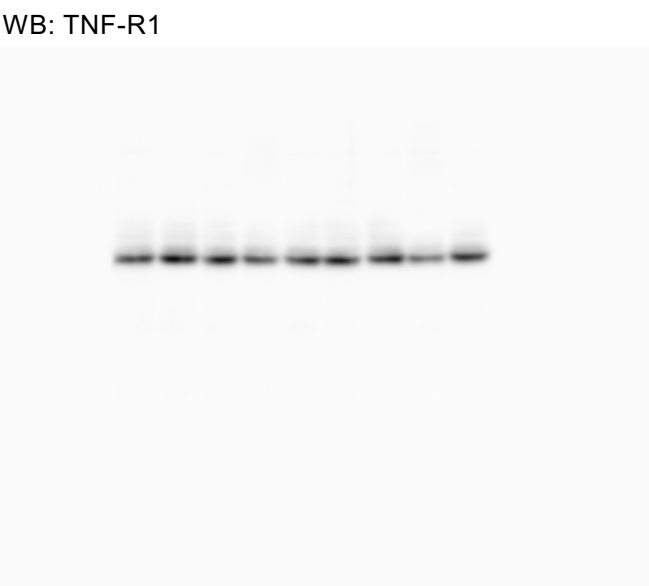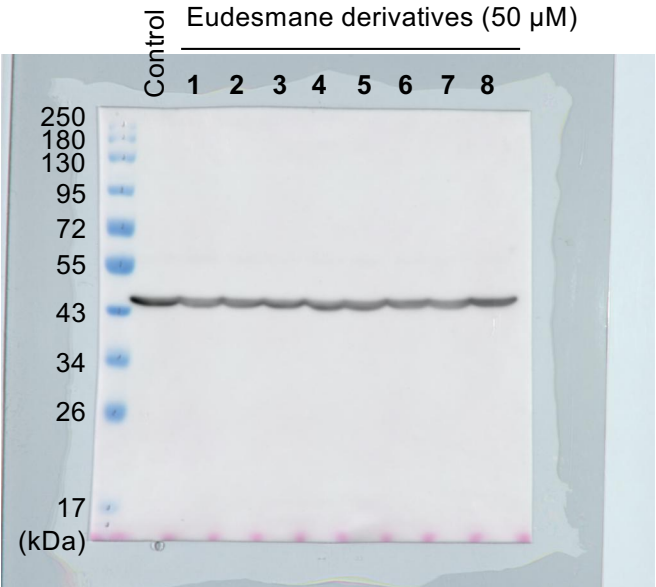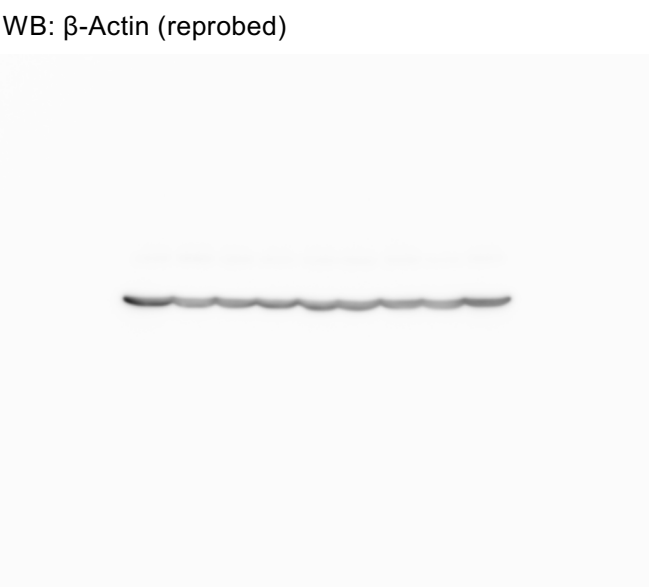



Figure S37: Original blots in Figure 8D

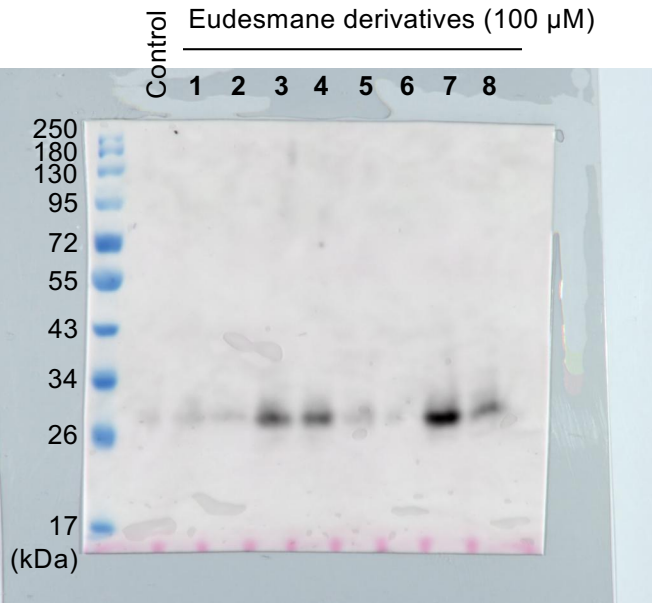

WB: TNF-R1

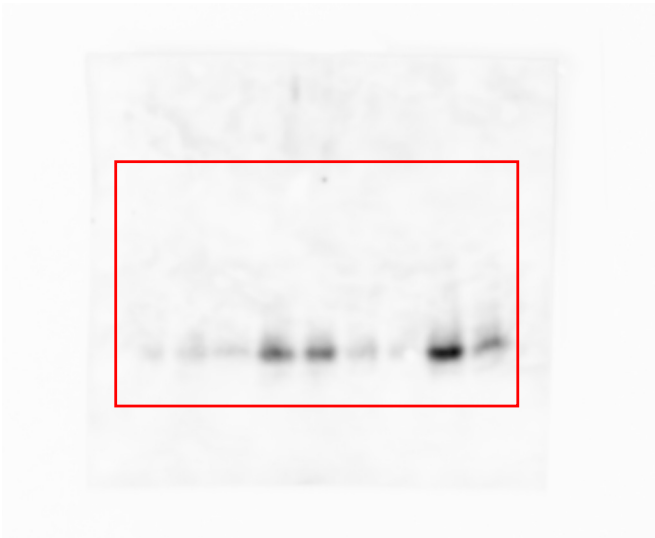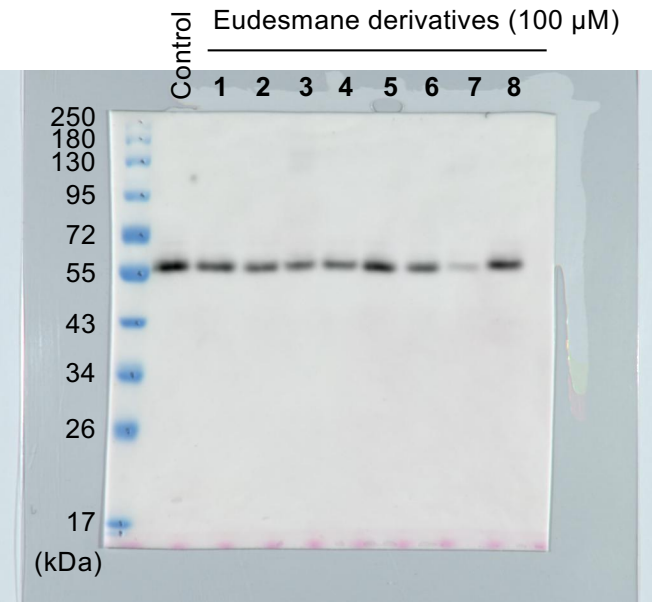

WB: TNF-R1

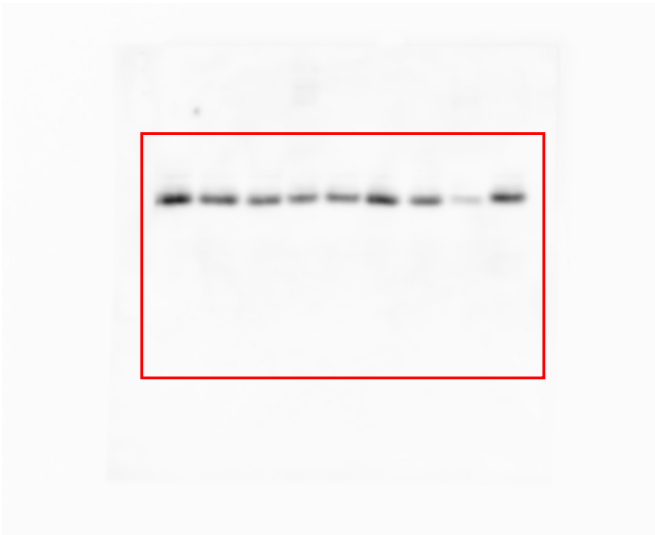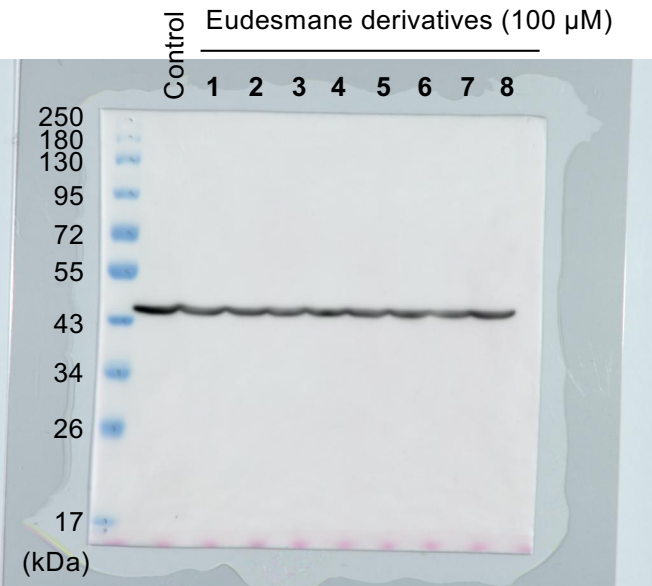

WB:  $\beta$ -Actin (reprobed)

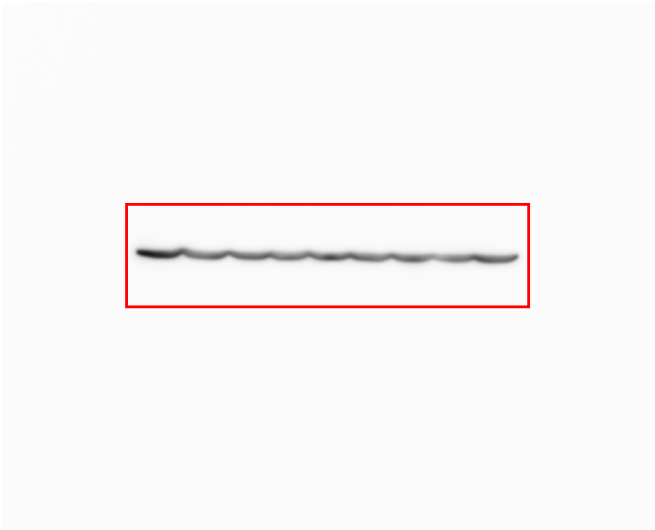

Figure S38: Original blots (1) in Figure 8E,F

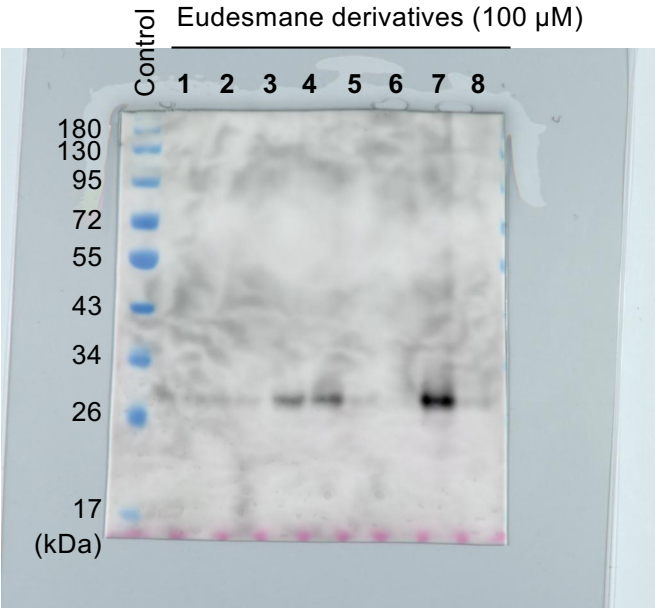

WB: TNF-R1

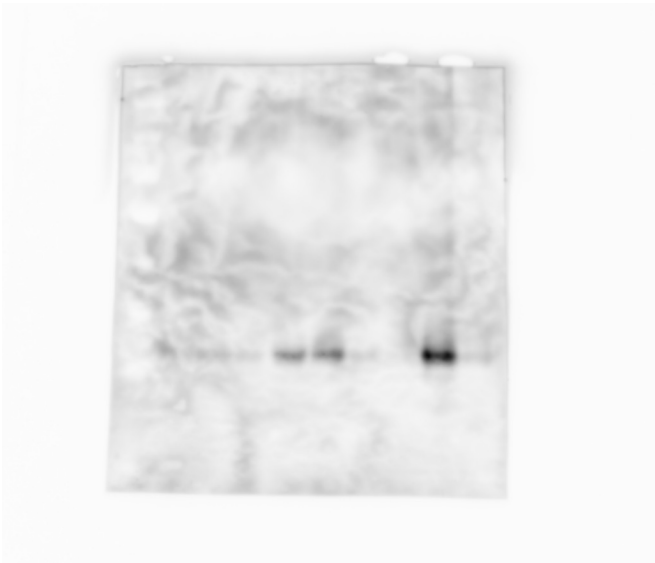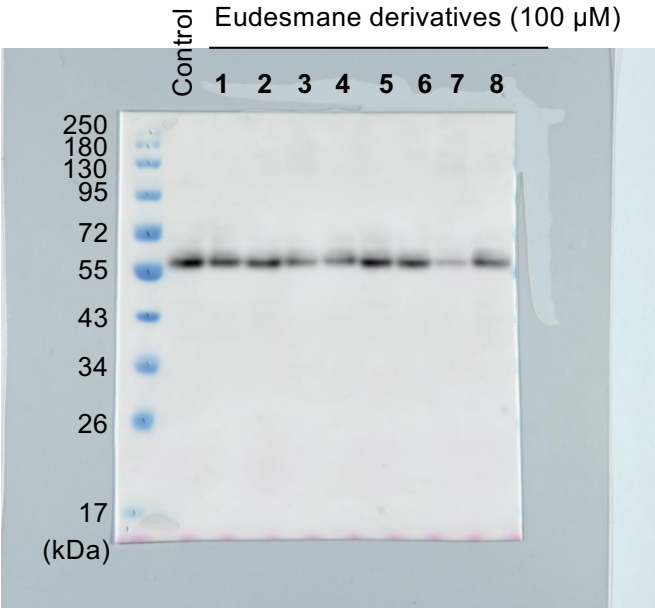

WB: TNF-R1

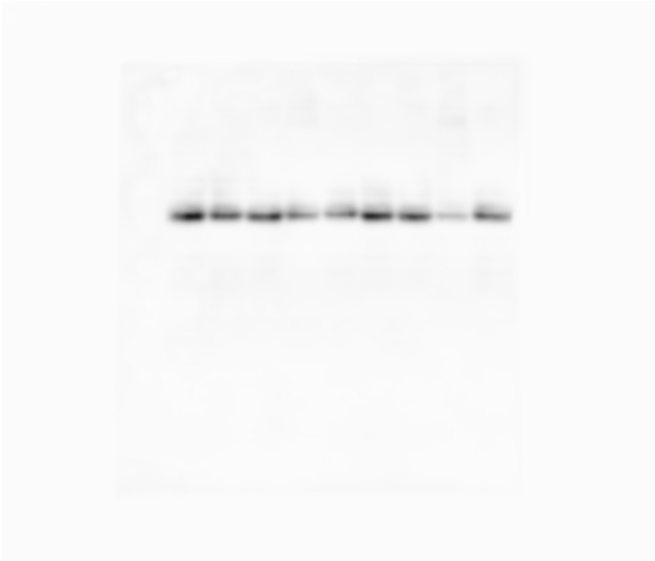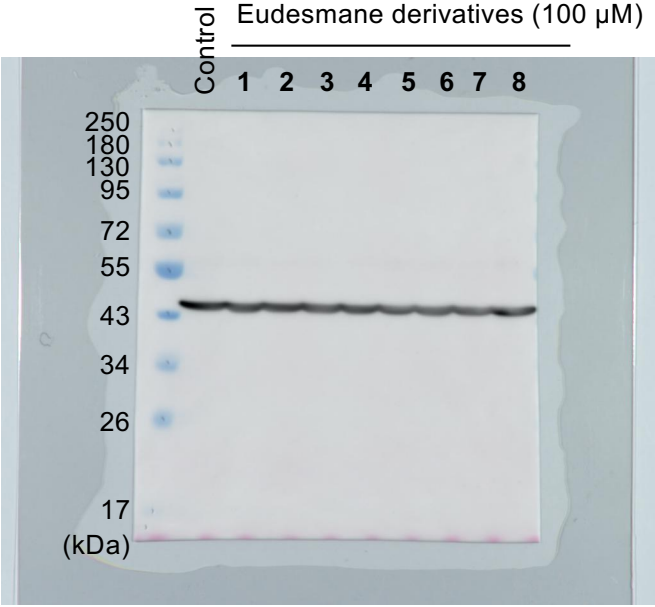

WB:  $\beta$ -Actin (reprobed)

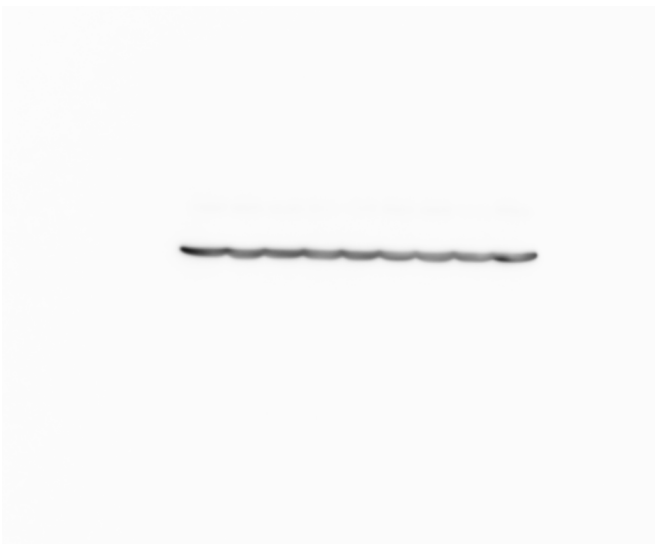

Figure S39: Original blots (2) in Figure 8E,F

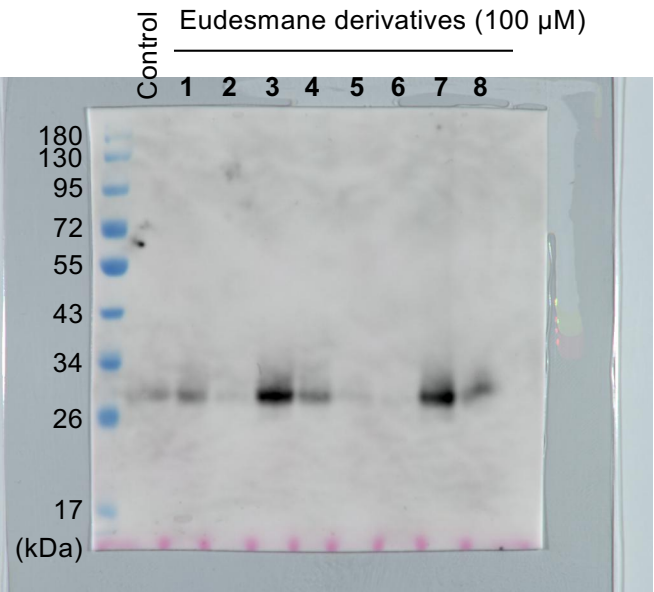

WB: TNF-R1

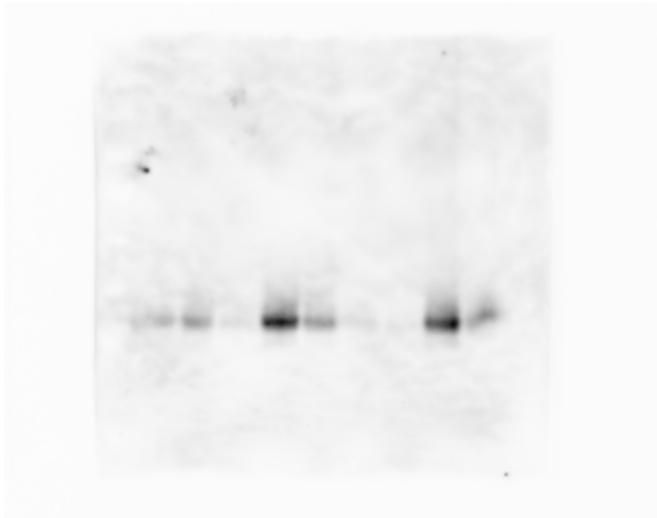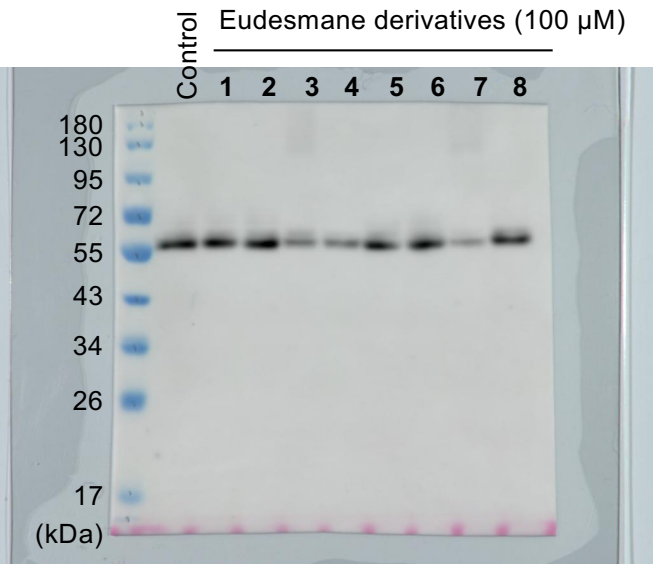

WB: TNF-R1

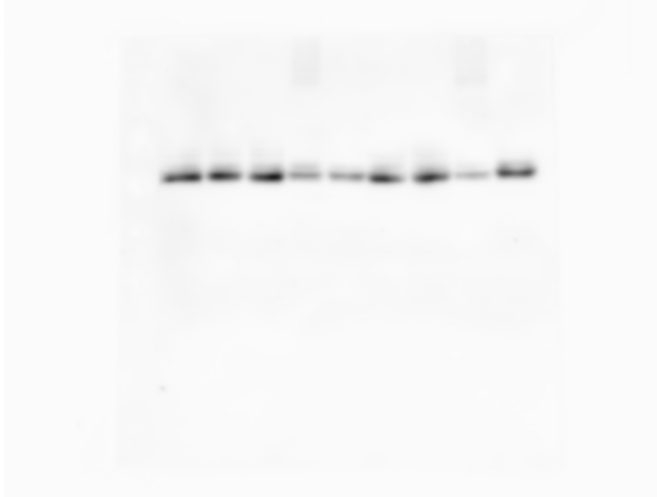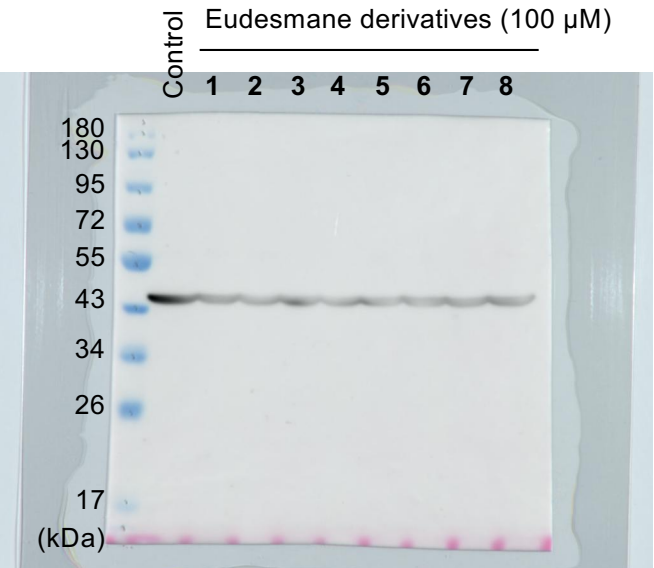

WB:  $\beta$ -Actin (reprobed)

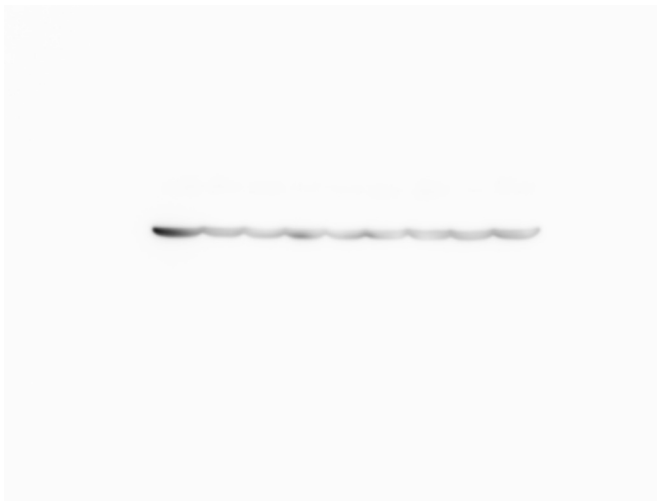

Figure S40: Original blots (3) in Figure 8E,F



WB: TNF-R1

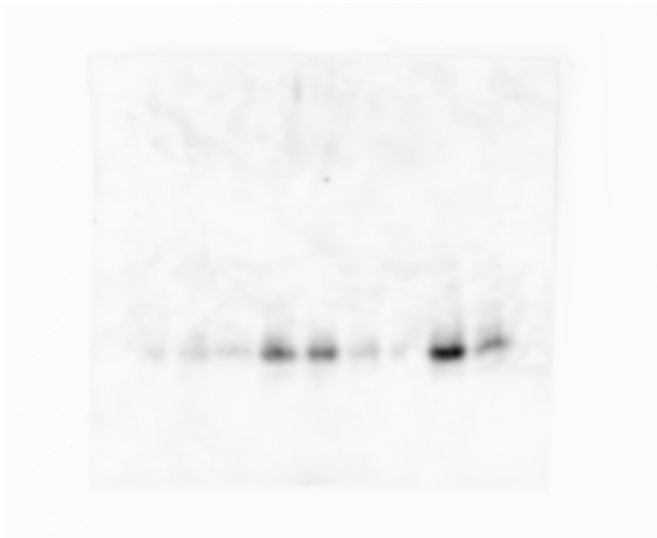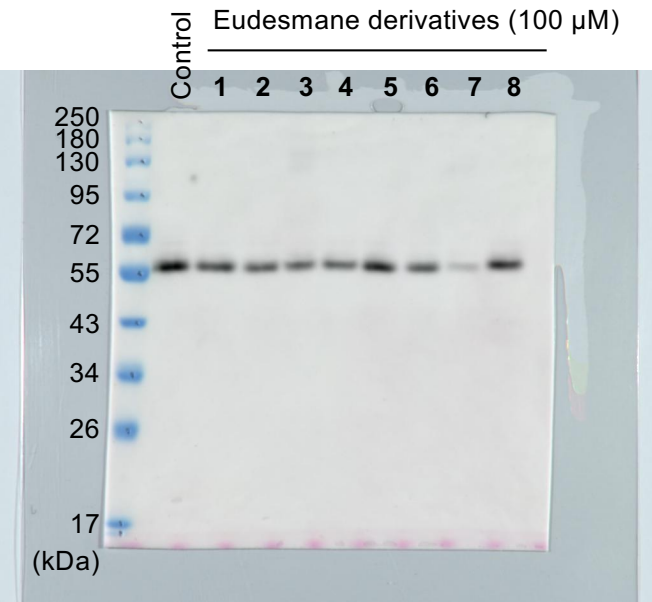

WB: TNF-R1

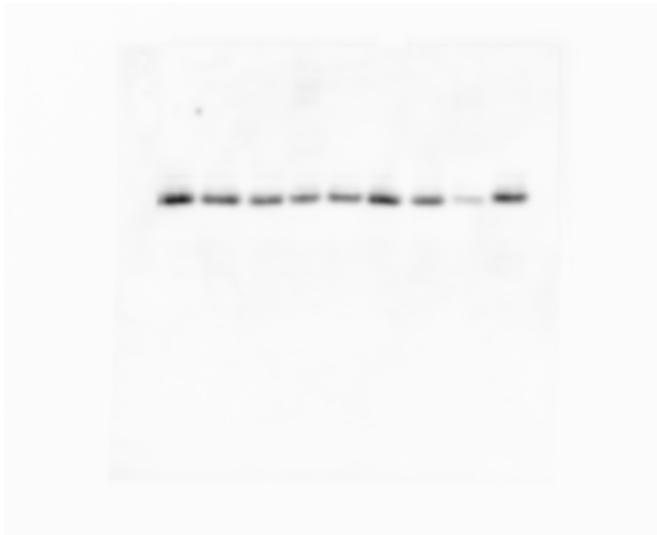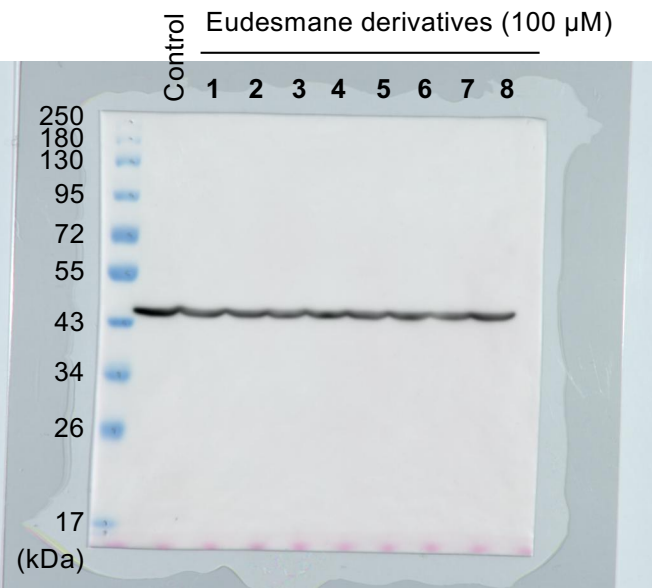

WB:  $\beta$ -Actin (reprobed)

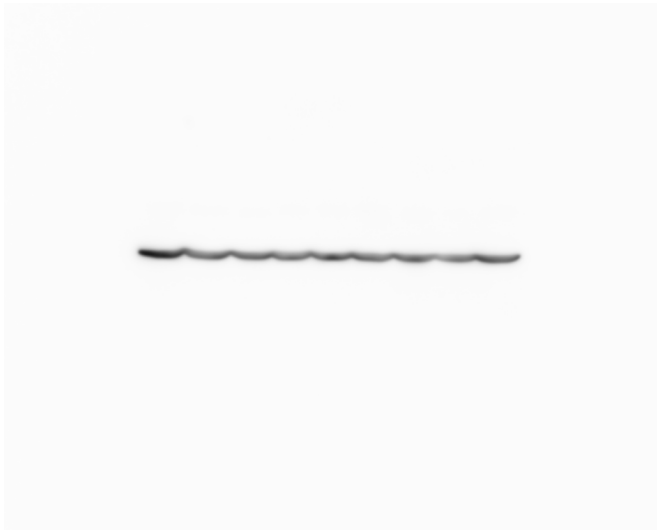

Figure S41: Original blots in Figure 9B

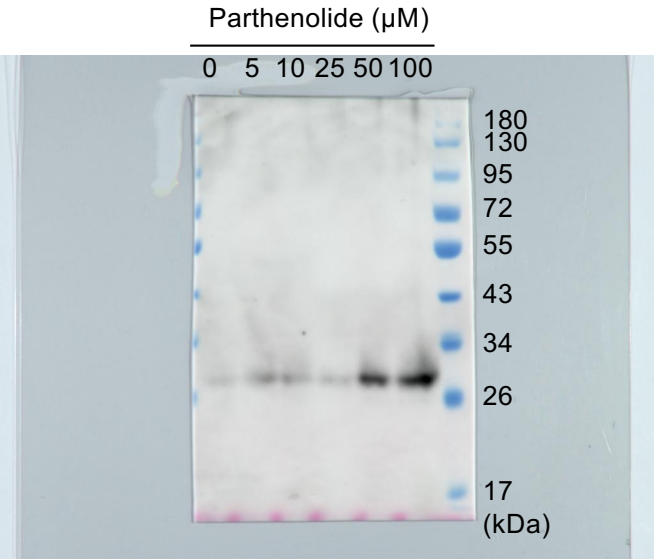

WB: TNF-R1

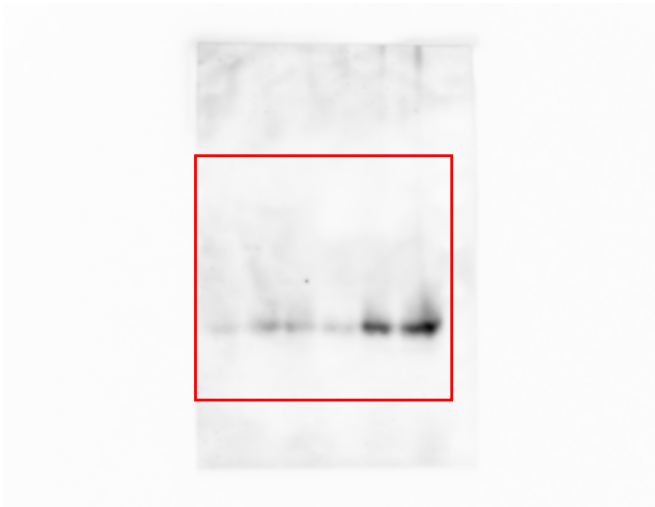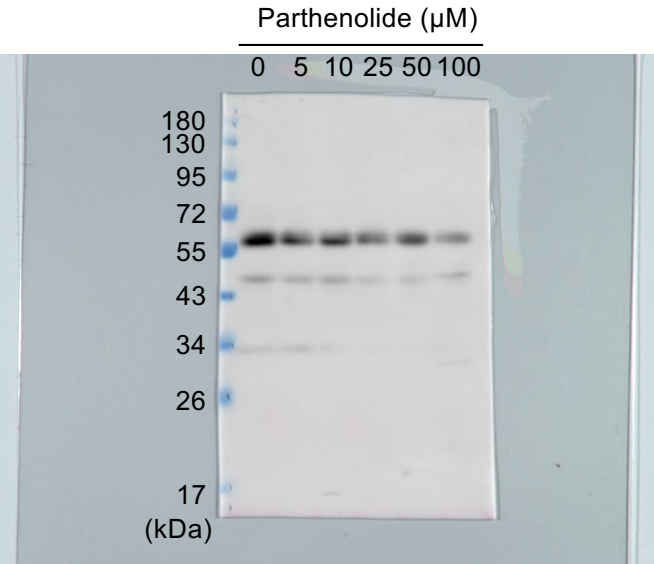

WB: TNF-R1

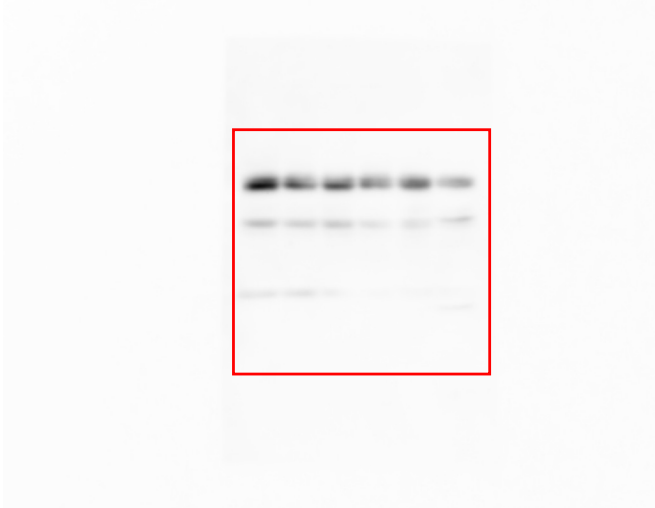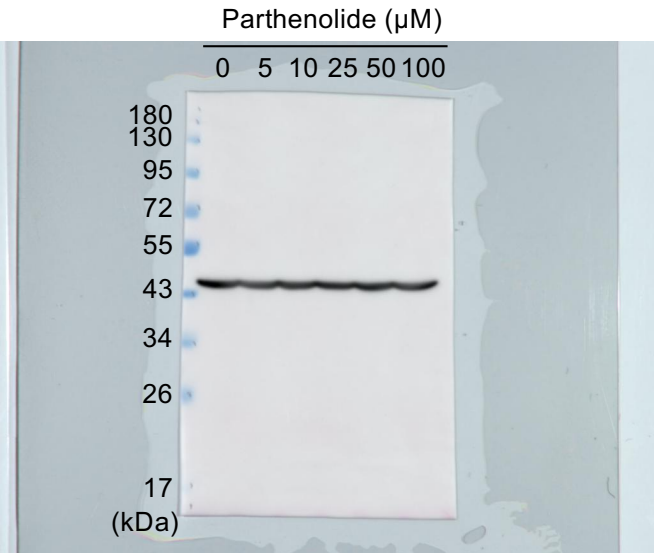

WB:  $\beta$ -Actin (reprobed)

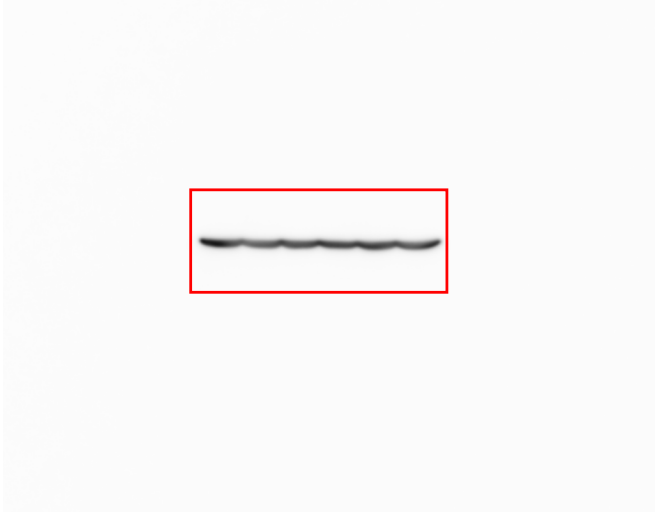

**Figure S42: Original blots (1) in Figure 9C,D**



WB: TNF-R1

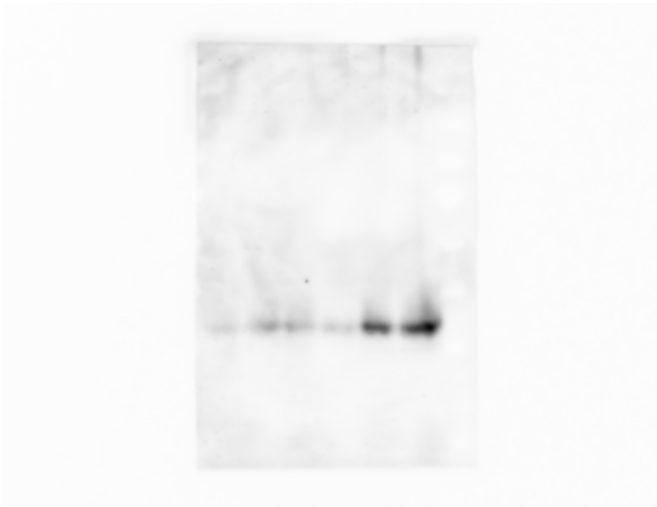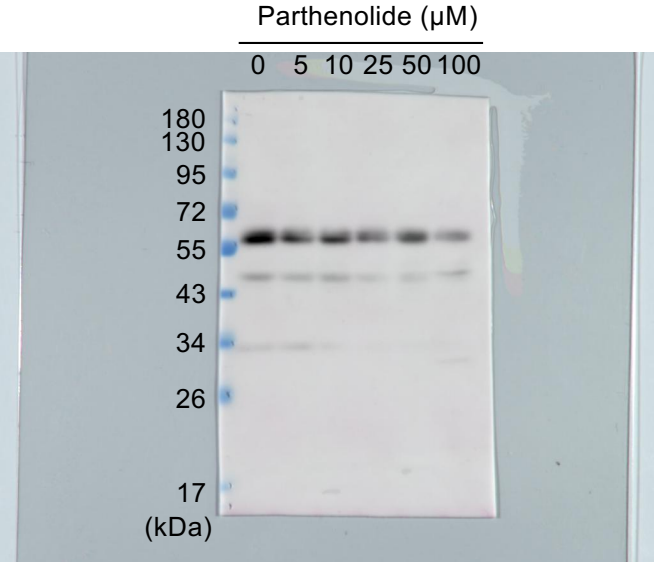

WB: TNF-R1

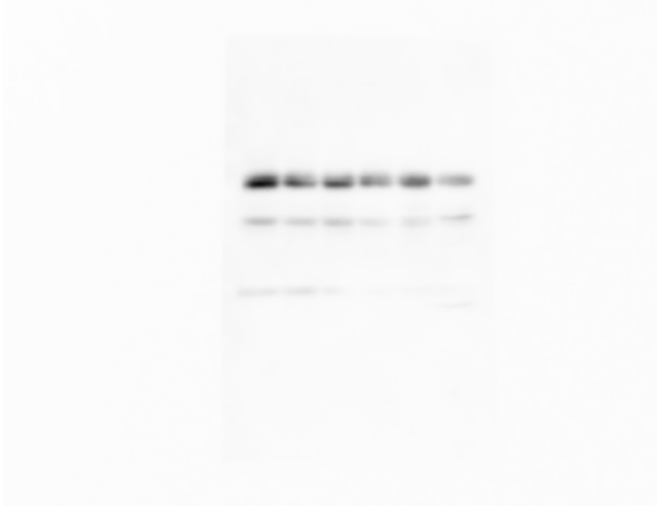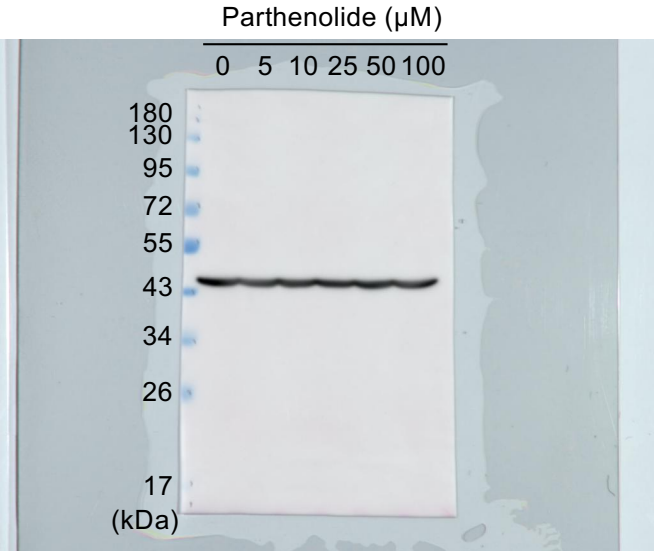

WB:  $\beta$ -Actin (reprobed)

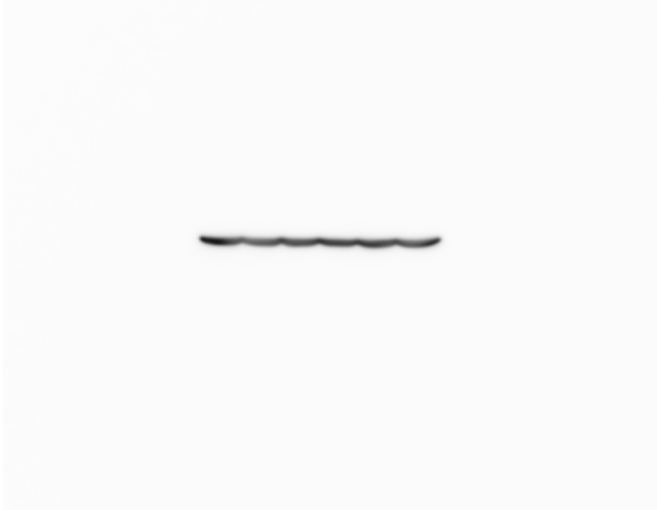



**Figure S43: Original blots (2) in Figure 9C,D**

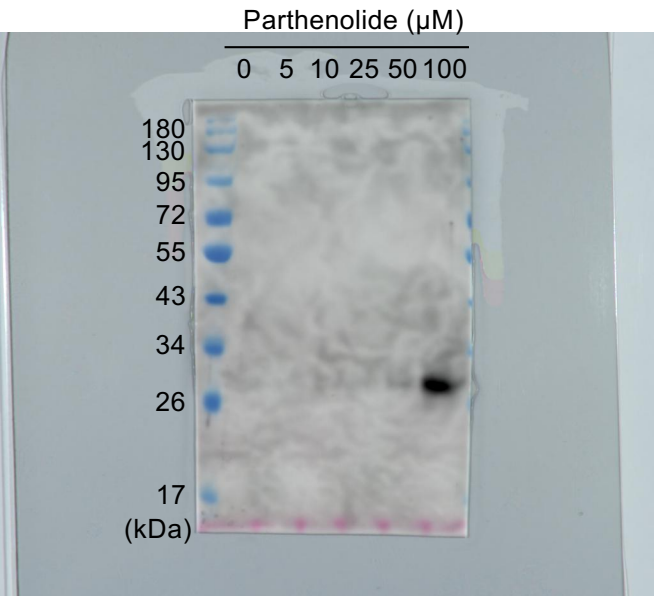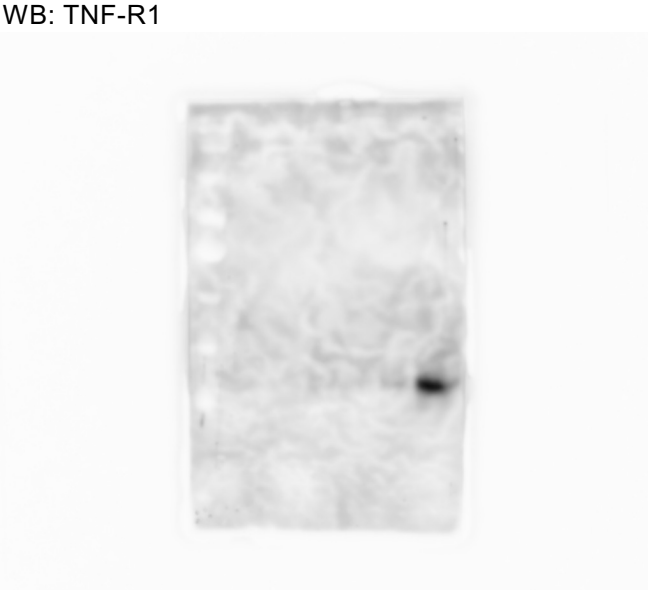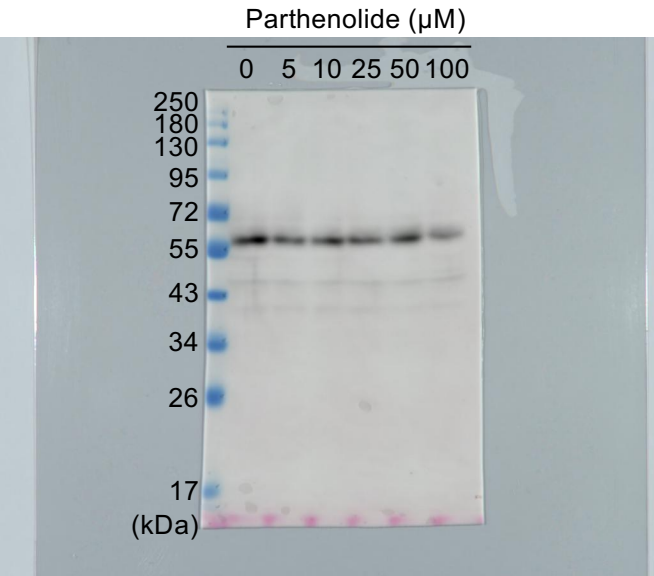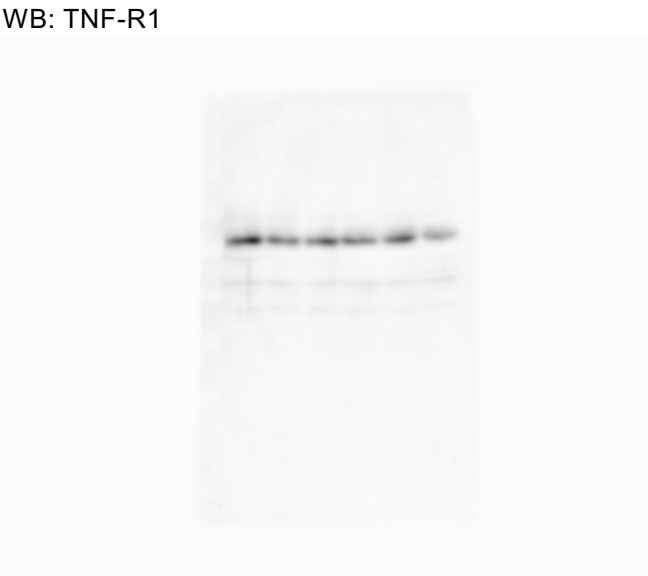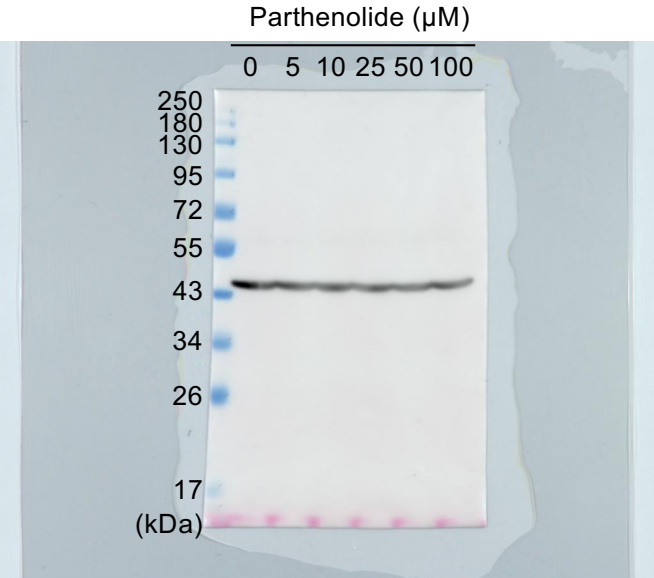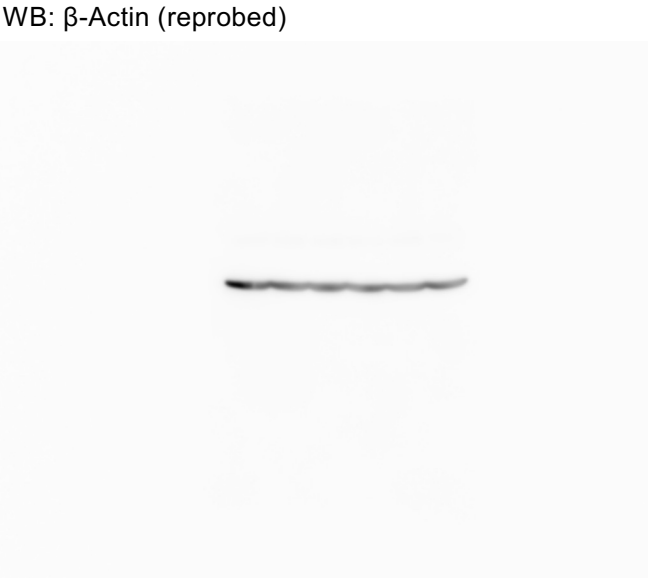

**Figure S44: Original blots (3) in Figure 9C,D**

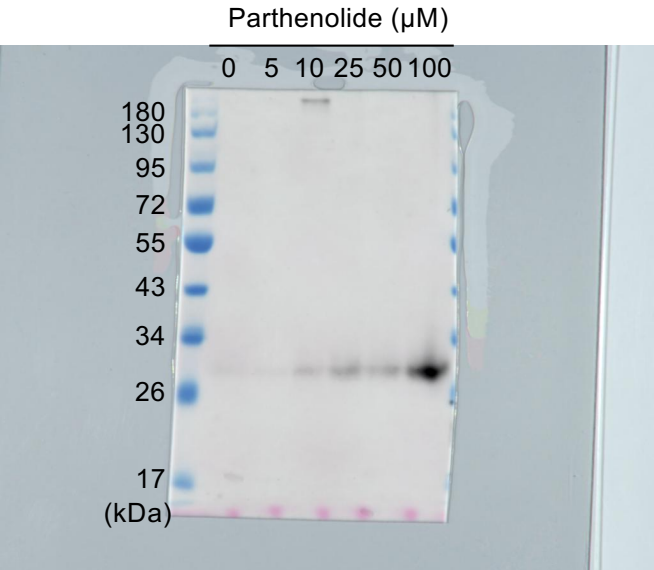

WB: TNF-R1

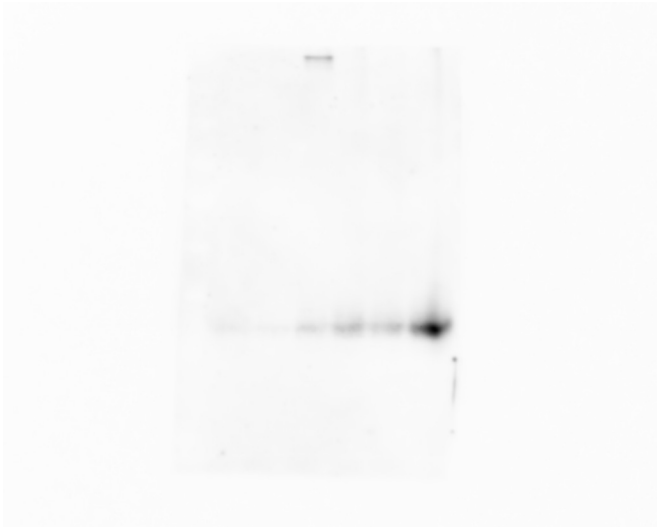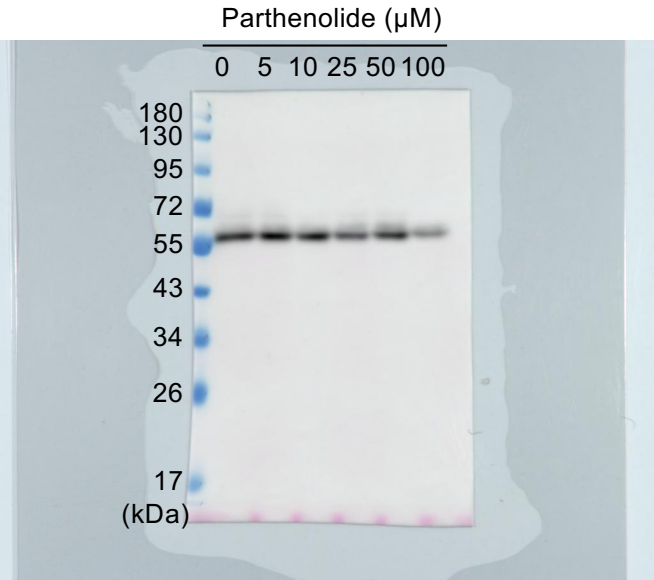

WB: TNF-R1

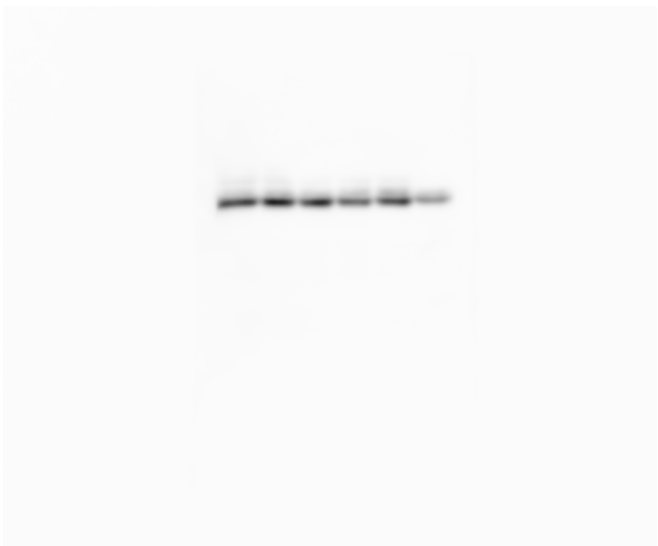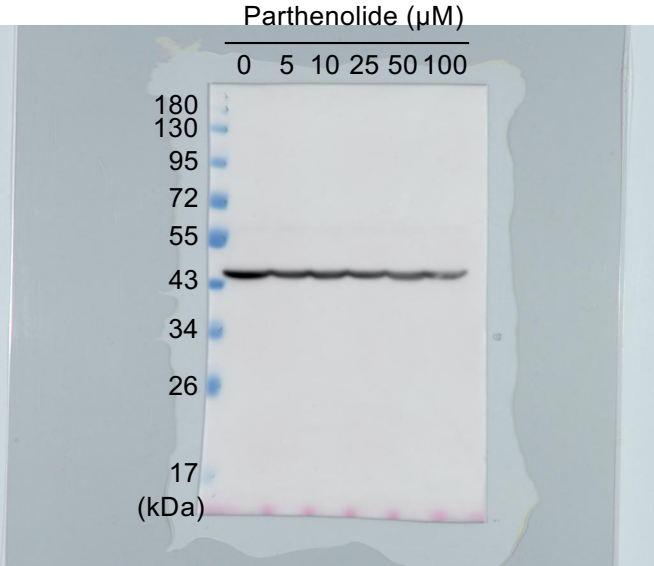

WB:  $\beta$ -Actin (reprobed)

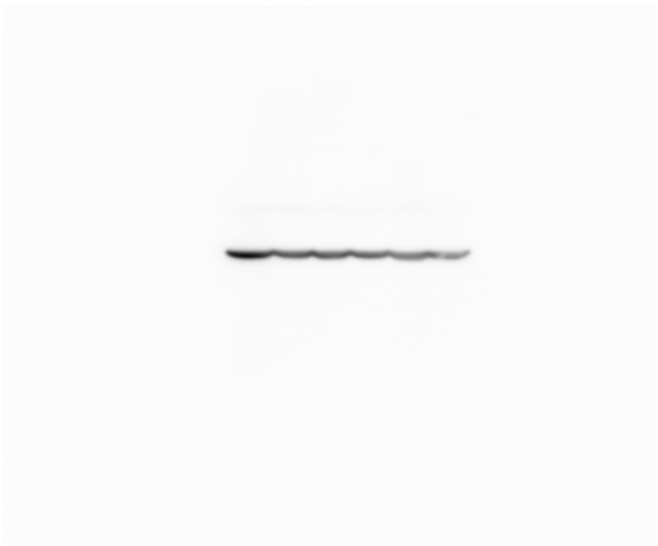



Figure S45: Original blots in Figure 9E

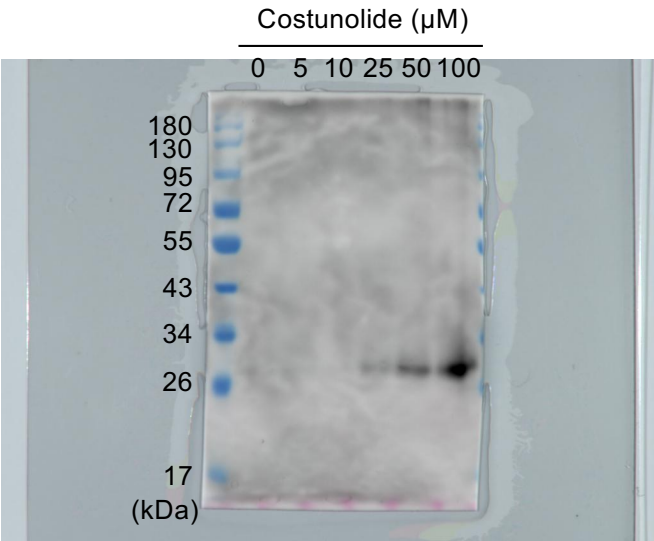

WB: TNF-R1

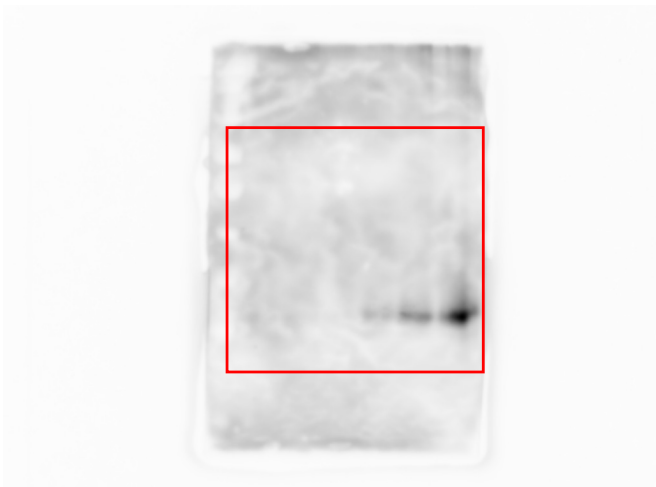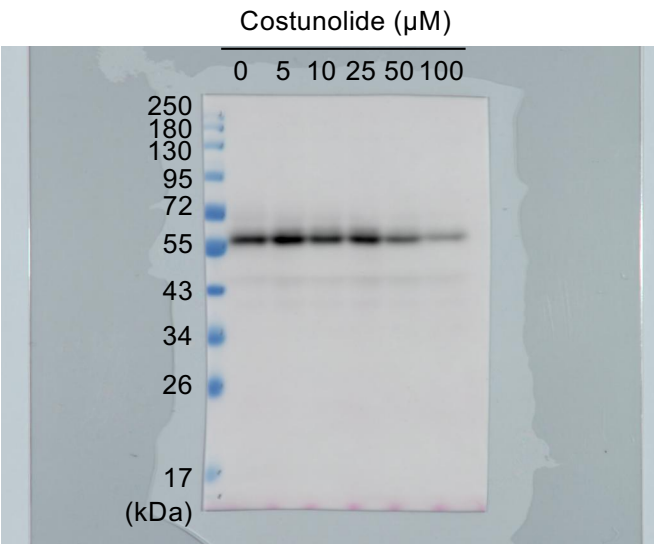

WB: TNF-R1

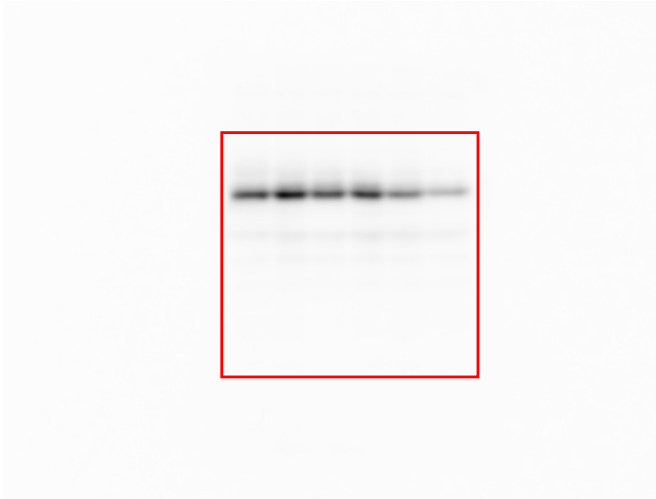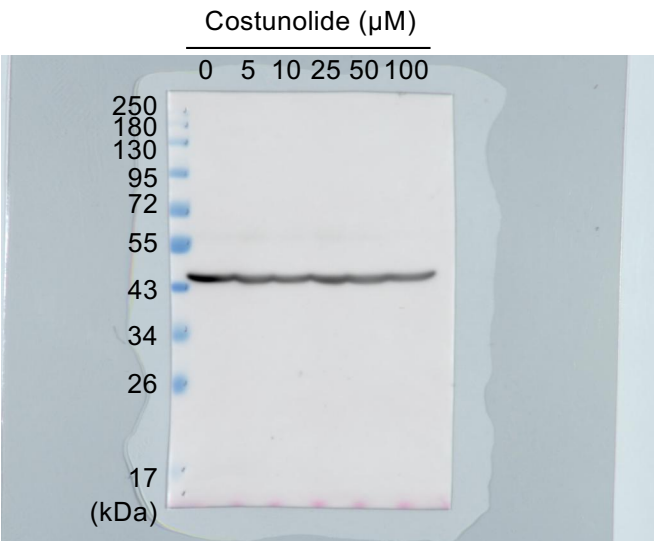

WB:  $\beta$ -Actin (reprobed)

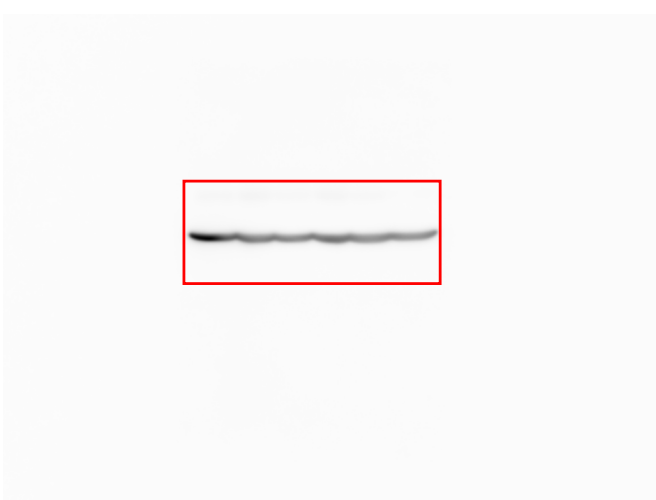

Figure S46: Original blots (1) in Figure 9F,G

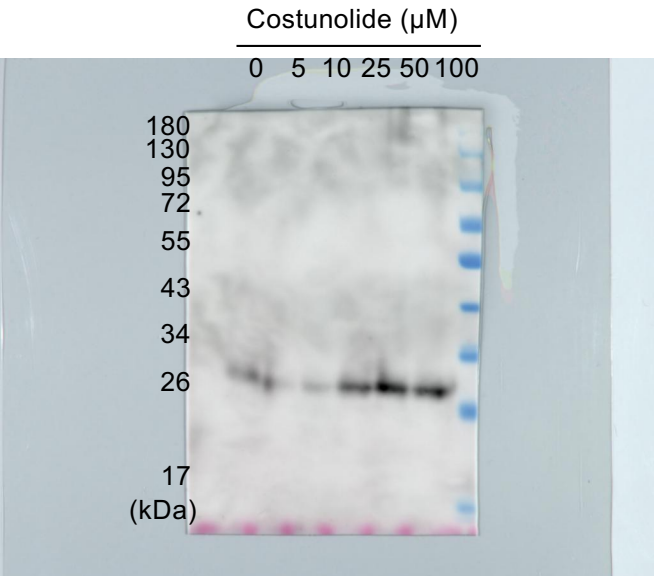

WB: TNF-R1

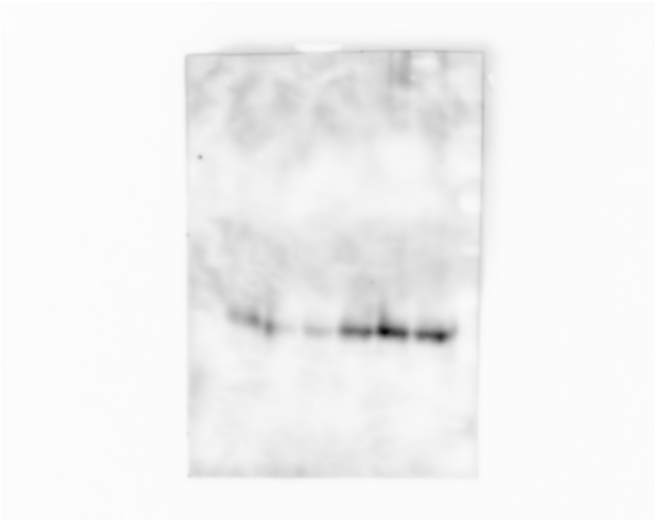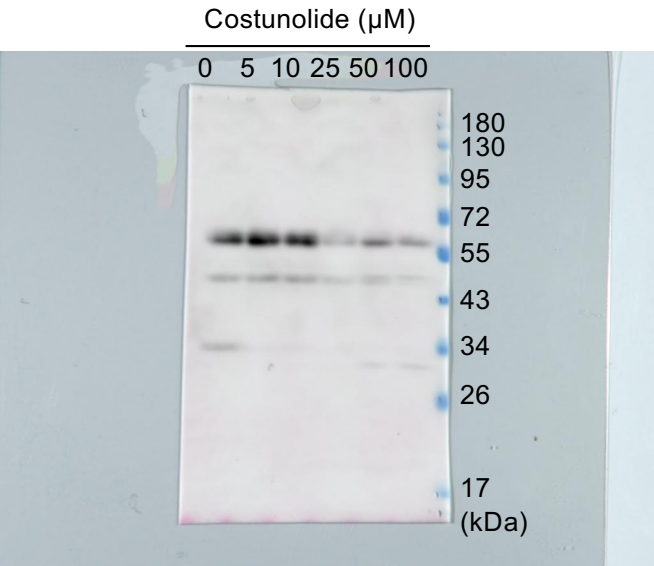

WB: TNF-R1

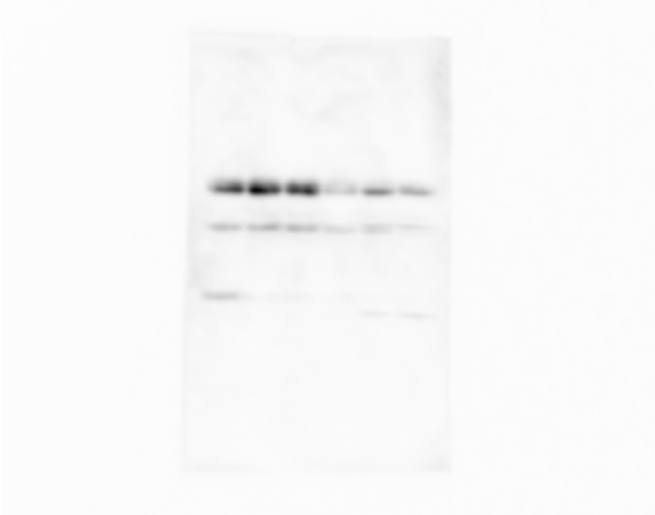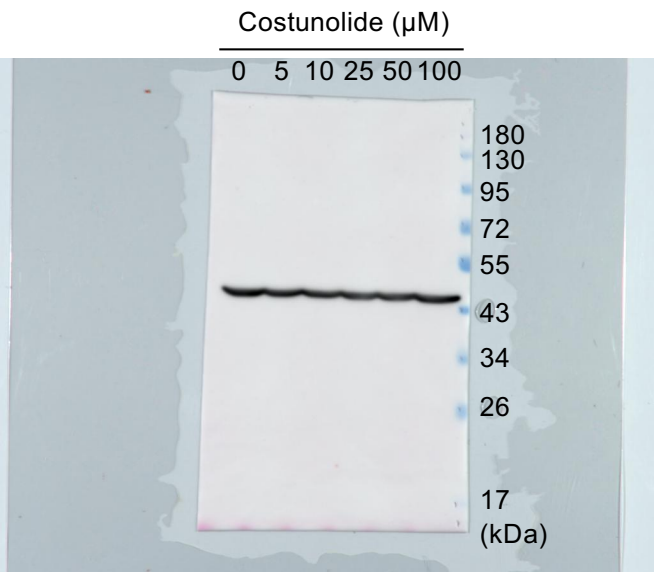

WB:  $\beta$ -Actin (reprobed)

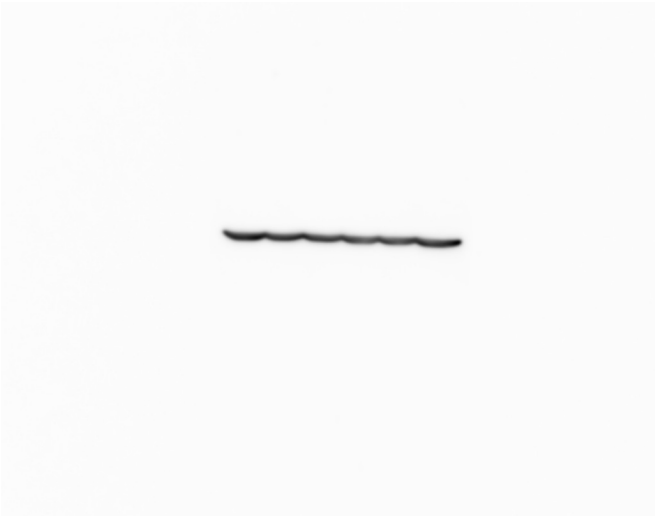

**Figure S47: Original blots (2) in Figure 9F,G**

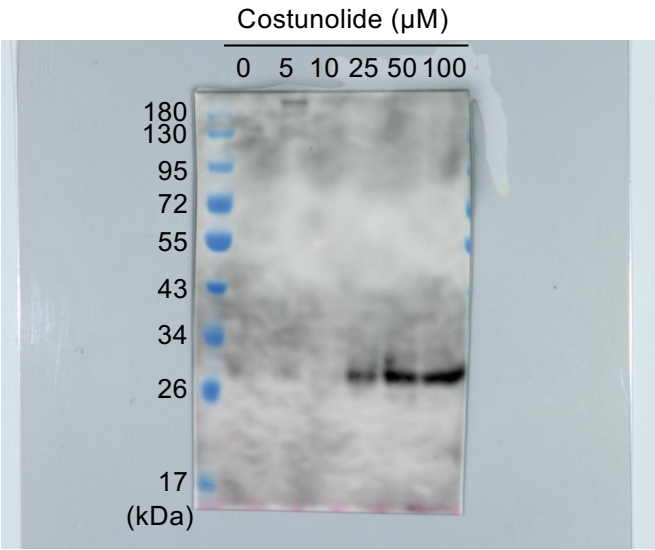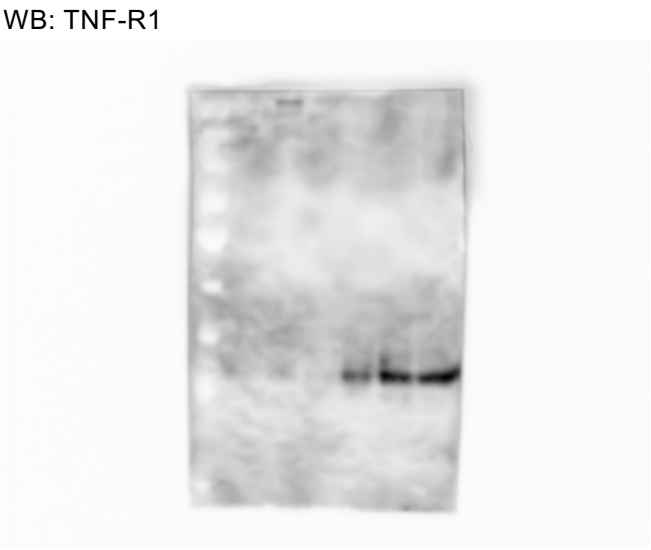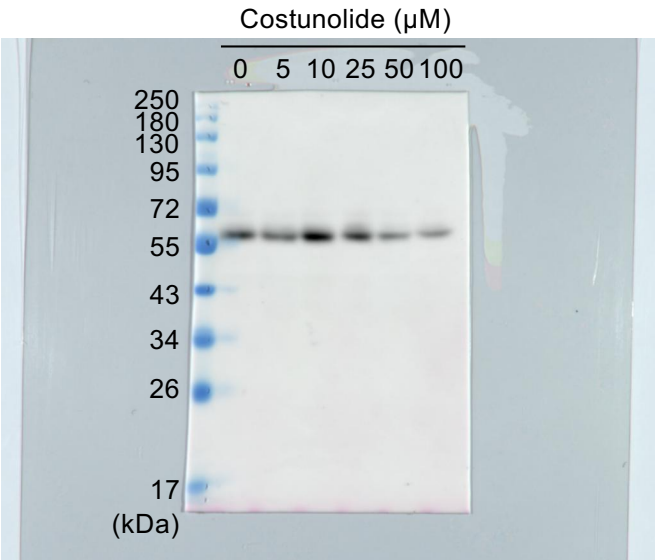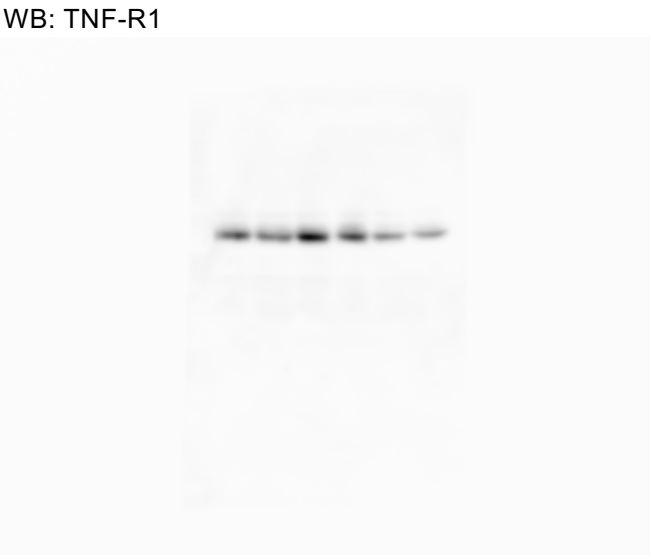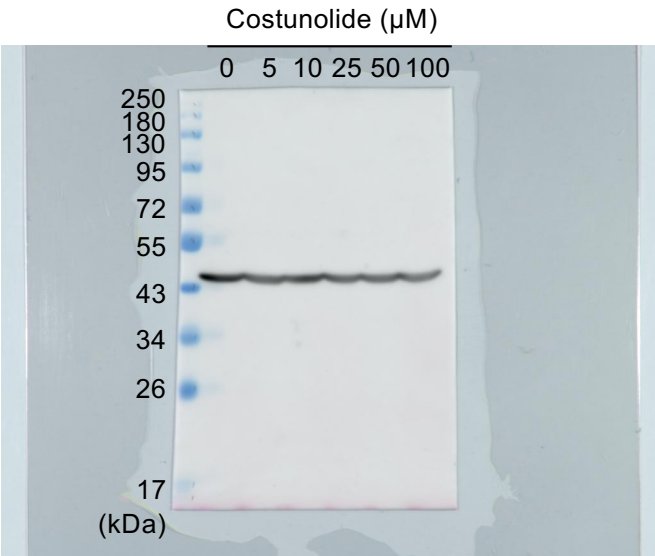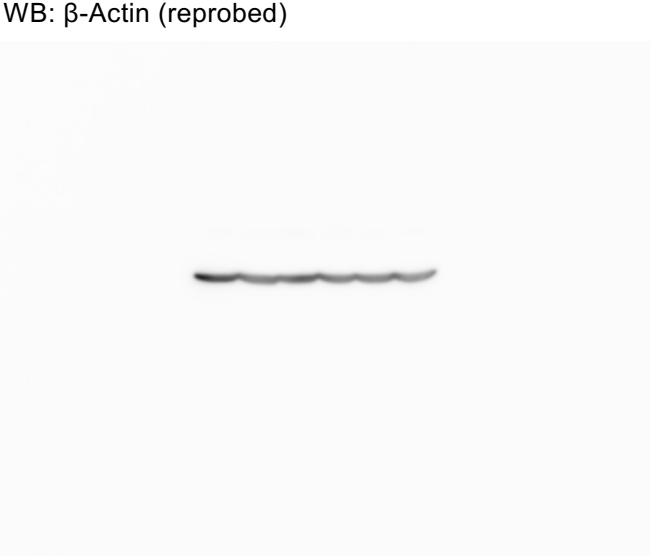

**Figure S48: Original blots (3) in Figure 9F,G**

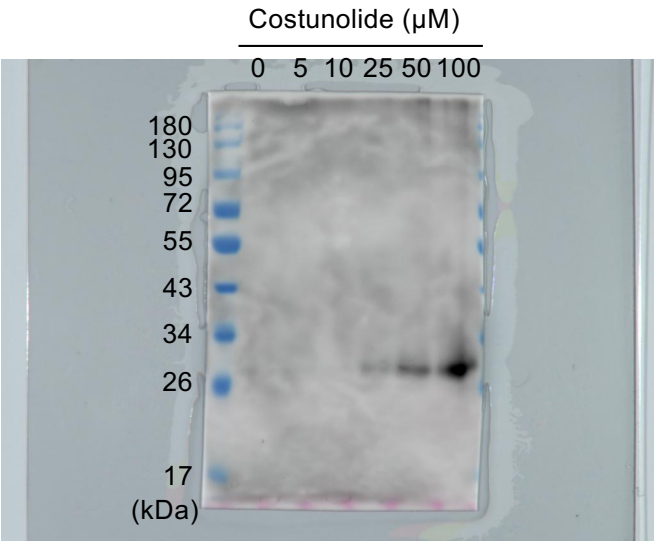

WB: TNF-R1

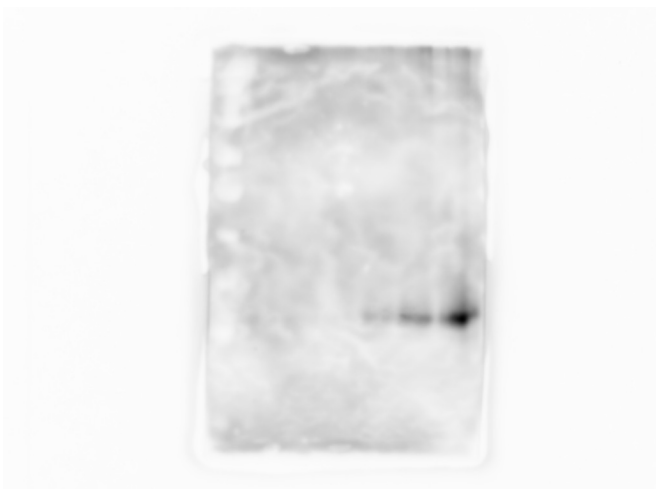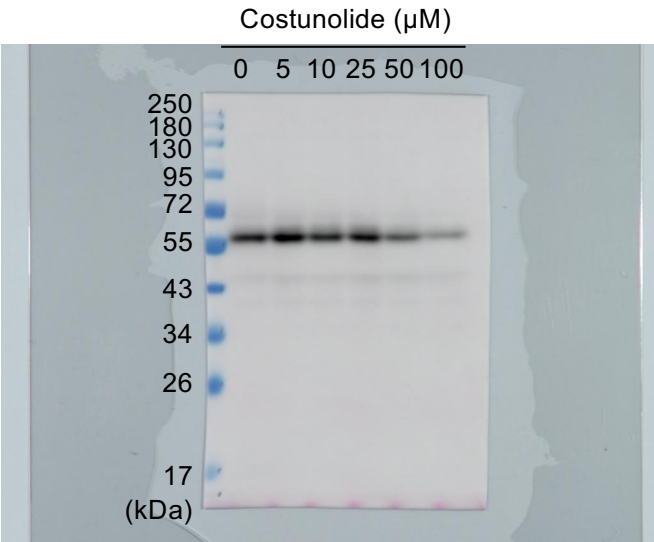

WB: TNF-R1

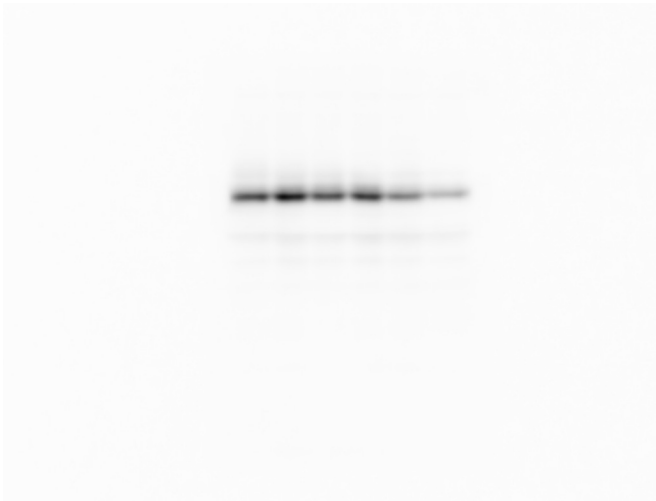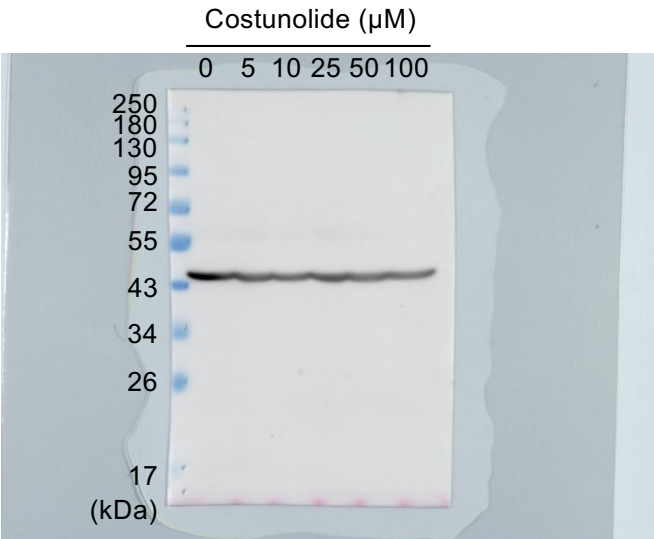

WB:  $\beta$ -Actin (reprobed)

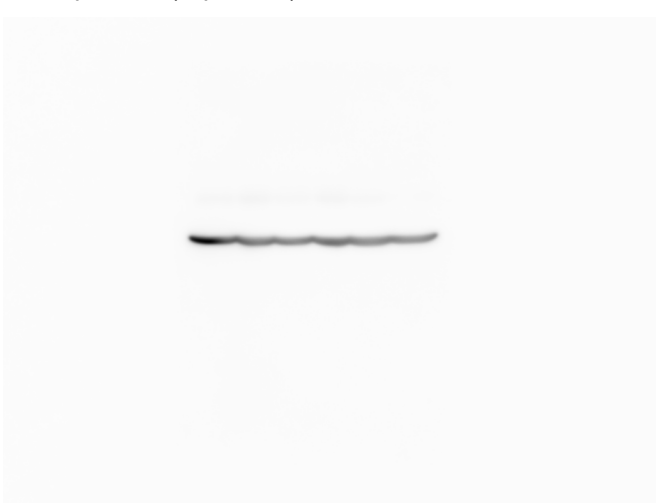

Supplement: s1 [file s1]
